# Supplementary material
Source: publisher figshare collection journal article supplement (https://gsajournals.figshare.com/ndownloader/files/16411772)
Supplement: Supplementary file 1 [file 16411772]

## Sheet: Ler_clf-2
Table S5. Genes differentially expressed between Ler and clf-2 inflorescence apices, p ≤ 0.05, FC ≥ 1.5
Array element	ID	Locus	Description	logFC	FC	AveExpr(log2)	AveExpresn	t	p-value	adj p-value
251625_at	6725	AT3G57260	PR2 (PATHOGENESIS-RELATED PROTEIN 2); glucan 1,3-beta-glucosidase/ hydrolase, hydrolyzing O-glycosyl compounds	5.44361	43.52	8.94409	492.539	69.3776	5.79872e-14	6.70796e-10
250445_at	5545	AT5G10760	aspartyl protease family protein	5.18839	36.4637	7.60167	194.236	69.2718	5.8816e-14	6.70796e-10
266746_s_at	21846	AT2G02930;AT4G02520	[AT2G02930, ATGSTF3 (GLUTATHIONE S-TRANSFERASE 16); glutathione transferase];[AT4G02520, ATGSTF2 (Arabidopsis thaliana Glutathione S-transferase (class phi) 2); glutathione transferase]	4.98768	31.7278	8.5566	376.524	48.4068	1.64392e-12	6.07423e-09
266385_at	21485	AT2G14610	PR1 (PATHOGENESIS-RELATED PROTEIN 1)	4.55194	23.4569	8.24592	303.577	55.5309	4.59311e-13	2.61922e-09
266070_at	21170	AT2G18660	expansin family protein (EXPR3)	4.50401	22.6905	8.48954	359.424	48.24	1.69746e-12	6.07423e-09
265983_at	21083	AT2G18550	ATHB21/HB-2 (homeobox-2); DNA binding / transcription factor	4.38377	20.8759	7.59123	192.835	45.2243	3.09014e-12	7.83179e-09
262832_s_at	17932	AT1G14870;AT1G14880	PCR2; membrane protein involved in zinc transport	4.10215	17.174	9.25293	610.11	65.4014	1.0039e-13	7.633e-10
248545_at	3645	AT5G50260	cysteine proteinase, putative	4.02473	16.2767	7.08057	135.352	44.4183	3.6512e-12	8.32838e-09
258327_at	13427	AT3G22640	cupin family protein	3.92958	15.2378	7.20232	147.27	36.3151	2.36104e-11	3.16795e-08
259272_at	14372	AT3G01290	band 7 family protein	3.87084	14.6298	7.31025	158.71	47.7558	1.86408e-12	6.07423e-09
256109_at	11209	AT1G16950	transmembrane protein	3.76348	13.5807	6.9668	125.088	24.2363	9.8457e-10	4.01037e-07
245329_at	429	AT4G14365	XB3 ORTHOLOG 4 IN ARABIDOPSIS THALIANA, XBAT34	3.60981	12.2084	6.80211	111.594	36.0372	2.53503e-11	3.21244e-08
252345_at	7445	AT3G48640	transmembrane protein	3.60227	12.1448	7.16629	143.637	38.8723	1.25724e-11	2.20597e-08
259925_at	15025	AT1G75040	PR5 (PATHOGENESIS-RELATED PROTEIN 5)	3.56646	11.8471	8.97112	501.854	41.4579	6.92194e-12	1.359e-08
262119_s_at	17219	AT1G02930;AT1G02920	[AT1G02930, ATGSTF6 (EARLY RESPONSIVE TO DEHYDRATION 11); glutathione transferase];[AT1G02920, ATGSTF7 (GLUTATHIONE S-TRANSFERASE 11); glutathione transferase]	3.45251	10.9473	9.15501	570.076	29.6883	1.52025e-10	1.31879e-07
263475_at	18575	AT2G31945	similar to unknown protein [Arabidopsis thaliana] (TAIR:AT1G05575.1); similar to hypothetical protein [Oryza sativa (japonica cultivar-group)] (GB:BAD38225.1); similar to Os06g0207200 [Oryza sativa (japonica cultivar-group)] (GB:NP_001057099.1); similar to Os02g0774200 [Oryza sativa (japonica cultivar-group)] (GB:NP_001048273.1)	3.41976	10.7016	6.80413	111.75	37.7235	1.65996e-11	2.52424e-08
260568_at	15668	AT2G43570	chitinase, putative	3.38071	10.4158	6.87921	117.719	41.3135	7.14951e-12	1.359e-08
260116_at	15216	AT1G33960	AIG1 (AVRRPT2-INDUCED GENE 1); GTP binding	3.21989	9.31717	6.08957	68.0995	46.1255	2.57316e-12	7.33672e-09
264433_at	19533	AT1G61810	BGLU45; hydrolase, hydrolyzing O-glycosyl compounds	3.21019	9.25474	7.96756	250.307	23.285	1.42186e-09	5.49706e-07
264346_at	19446	AT1G12010	1-aminocyclopropane-1-carboxylate oxidase, putative / ACC oxidase, putative	3.1593	8.93396	7.39128	167.879	14.8881	8.27866e-08	8.06639e-06
248322_at	3422	AT5G52760	heavy-metal-associated domain-containing protein	3.14529	8.8476	5.9587	62.1937	35.8116	2.68676e-11	3.22553e-08
264998_at	20098	AT1G67330	similar to unknown protein [Arabidopsis thaliana] (TAIR:AT1G27930.1); similar to hypothetical protein MA4_111B14.64 [Musa acuminata] (GB:ABF72010.1); contains InterPro domain Protein of unknown function DUF579, plant; (InterPro:IPR006514)	3.09925	8.56971	6.48153	89.358	34.8573	3.44967e-11	3.79604e-08
250476_at	5576	AT5G10140	FLC (FLOWERING LOCUS C); transcription factor	3.02327	8.13008	6.64268	99.9182	32.9985	5.72636e-11	5.44243e-08
249454_at	4554	AT5G39520	similar to unknown protein [Arabidopsis thaliana] (TAIR:AT5G39530.1); similar to hypothetical protein MtrDRAFT_AC119412g1v1 [Medicago truncatula] (GB:ABE86761.1)	2.94634	7.70791	7.28417	155.867	15.7593	4.96446e-08	5.49797e-06
265993_at	21093	AT2G24160	transposable element gene	2.94619	7.70714	5.98557	63.3629	34.7148	3.58289e-11	3.79604e-08
264635_at	19735	AT1G65500	similar to unknown protein [Arabidopsis thaliana] (TAIR:AT1G65490.1)	2.94519	7.70178	6.48823	89.7742	18.4255	1.20624e-08	2.27392e-06
258063_at	13163	AT3G14620	CYP72A8 (cytochrome P450, family 72, subfamily A, polypeptide 8); oxygen binding	2.93998	7.67402	8.03021	261.418	15.9282	4.50973e-08	5.1692e-06
258809_at	13909	AT3G04070	ANAC047 (Arabidopsis NAC domain containing protein 47); transcription factor	2.9144	7.53914	7.67018	203.683	26.189	4.82894e-10	2.56158e-07
262128_at	17228	AT1G52690	late embryogenesis abundant protein, putative / LEA protein, putative	2.83874	7.15394	9.13414	561.889	19.2712	8.01876e-09	1.69359e-06
256497_at	11597	AT1G31580	ECS1; cell wall protein	2.78988	6.91571	8.33034	321.871	36.6697	2.1579e-11	3.07635e-08
256300_at	11400	AT1G69490	NAP (NAC-LIKE, ACTIVATED BY AP3/PI); transcription factor	2.78353	6.88537	9.06491	535.561	29.1777	1.78411e-10	1.45341e-07
246279_at	1379	AT4G36740	ATHB40 (ARABIDOPSIS THALIANA HOMEOBOX PROTEIN 40); DNA binding / transcription factor	2.74145	6.68743	7.11296	138.425	21.2572	3.27573e-09	9.4e-07
251428_at	6528	AT3G60140	DIN2 (DARK INDUCIBLE 2); hydrolase, hydrolyzing O-glycosyl compounds	2.74039	6.68251	5.93442	61.1561	14.3095	1.18091e-07	1.00886e-05
256337_at	11437	AT1G72070;AT1G72060	[AT1G72070, DNAJ heat shock N-terminal domain-containing protein];[AT1G72060, serine-type endopeptidase inhibitor]	2.6098	6.1042	6.26589	76.9521	17.7306	1.71023e-08	2.84747e-06
265817_at	20917	AT2G18050	HIS1-3 (HISTONE H1-3); DNA binding	2.59848	6.05649	7.64802	200.578	27.4666	3.11451e-10	1.92005e-07
263584_at	18684	AT2G17040	ANAC036 (Arabidopsis NAC domain containing protein 36); transcription factor	2.57099	5.94218	5.70749	52.2548	27.9825	2.62373e-10	1.87023e-07
256787_at	11887	AT3G13790	ATBFRUCT1/ATCWINV1 (ARABIDOPSIS THALIANA CELL WALL INVERTASE 1); beta-fructofuranosidase/ hydrolase, hydrolyzing O-glycosyl compounds	2.45181	5.47102	7.33588	161.555	28.2125	2.43305e-10	1.84993e-07
264580_at	19680	AT1G05340	similar to unknown protein [Arabidopsis thaliana] (TAIR:AT2G32210.1); similar to conserved hypothetical protein [Medicago truncatula] (GB:ABD32591.1)	2.45056	5.46627	7.78915	221.191	26.7839	3.92696e-10	2.18473e-07
264514_at	19614	AT1G09500	cinnamyl-alcohol dehydrogenase family / CAD family	2.44644	5.4507	6.08855	68.0511	25.2275	6.81215e-10	3.17113e-07
261339_at	16439	AT1G35710	leucine-rich repeat transmembrane protein kinase, putative	2.43671	5.41407	5.75857	54.1381	19.3971	7.55684e-09	1.64163e-06
265615_at	20715	AT2G25450	GS-OH; 2-oxoglutarate-dependent dioxygenase, putative	2.41038	5.31613	6.70602	104.403	18.9254	9.45573e-09	1.94311e-06
245317_at	417	AT4G15610	integral membrane family protein	2.40976	5.31386	7.10428	137.594	14.6927	9.31997e-08	8.7485e-06
259841_at	14941	AT1G52200	similar to unknown protein [Arabidopsis thaliana] (TAIR:AT3G18470.1); similar to Uncharacterized Cys-rich domain [Medicago truncatula] (GB:ABD32291.1); contains InterPro domain Protein of unknown function Cys-rich; (InterPro:IPR006461)	2.40833	5.3086	6.15217	71.1192	16.4135	3.43982e-08	4.4329e-06
264960_at	20060	AT1G76930	ATEXT4 (EXTENSIN 4)	2.38362	5.21845	5.23336	37.6182	8.98121	6.87388e-06	0.000186881
262928_at	18028	AT1G65760	F-box family protein	2.37094	5.17277	6.07841	67.5747	26.3115	4.62605e-10	2.51239e-07
260869_at	15969	AT1G43800	acyl-(acyl-carrier-protein) desaturase, putative / stearoyl-ACP desaturase, putative	2.36375	5.14708	8.47113	354.867	16.3459	3.5704e-08	4.49949e-06
259620_s_at	14720	AT1G42705;AT4G12260	transposable element gene	2.36125	5.13816	6.83547	114.204	10.9773	1.22884e-06	5.41959e-05
257623_at	12723	AT3G26210	CYP71B23 (cytochrome P450, family 71, subfamily B, polypeptide 23); oxygen binding	2.34301	5.07359	5.90939	60.1042	15.4671	5.87572e-08	6.14726e-06
265837_at	20937	AT2G14560	similar to unknown protein [Arabidopsis thaliana] (TAIR:AT1G33840.1); similar to Protein of unknown function DUF567 [Medicago truncatula] (GB:ABE88873.1); contains InterPro domain Protein of unknown function DUF567; (InterPro:IPR007612)	2.34162	5.06872	8.54089	372.447	33.4418	5.06177e-11	5.01996e-08
249495_at	4595	AT5G39100	GLP6 (GERMIN-LIKE PROTEIN 6); manganese ion binding / metal ion binding / nutrient reservoir	2.34015	5.06355	7.55213	187.679	28.855	1.97687e-10	1.55491e-07
261567_at	16667	AT1G33055	unknown protein	2.3321	5.03537	7.32555	160.402	29.6032	1.56104e-10	1.31879e-07
255479_at	10579	AT4G02380	SAG21 (SENESCENCE-ASSOCIATED GENE 21)	2.3087	4.95436	8.70205	416.465	20.7969	4.00144e-09	1.0474e-06
249754_at	4854	AT5G24530	oxidoreductase, 2OG-Fe(II) oxygenase family protein	2.27916	4.85394	7.83513	228.354	25.873	5.39966e-10	2.68239e-07
249346_at	4446	AT5G40780	LHT1 (LYSINE HISTIDINE TRANSPORTER 1); amino acid permease/ amino acid transporter	2.27719	4.84734	8.71657	420.679	28.0166	2.59442e-10	1.87023e-07
259561_at	14661	AT1G21250	WAK1 (CELL WALL-ASSOCIATED KINASE); kinase	2.27687	4.84626	8.93172	488.331	16.8587	2.70052e-08	3.88637e-06
251400_at	6500	AT3G60420	similar to unknown protein [Arabidopsis thaliana] (TAIR:AT3G60450.1); similar to pRIB5 protein [Ribes nigrum] (GB:CAA07566.1); contains InterPro domain Phosphoglycerate mutase; (InterPro:IPR013078); contains InterPro domain PRIB5; (InterPro:IPR012398)	2.27418	4.83723	7.81541	225.254	22.6519	1.83073e-09	6.23267e-07
266294_at	21394	AT2G29500	17.6 kDa class I small heat shock protein (HSP17.6B-CI)	2.23107	4.69482	5.57848	47.7848	15.2772	6.56604e-08	6.6565e-06
248062_at	3162	AT5G55450	protease inhibitor/seed storage/lipid transfer protein (LTP) family protein	2.22375	4.67107	10.4438	1392.8	34.6337	3.66124e-11	3.79604e-08
260567_at	15667	AT2G43820	GT/UGT74F2 (UDP-GLUCOSYLTRANSFERASE 74F2); UDP-glucosyltransferase/ UDP-glycosyltransferase/ transferase, transferring glycosyl groups / transferase, transferring hexosyl groups	2.20129	4.5989	7.87373	234.547	20.0661	5.54716e-09	1.31803e-06
247718_at	2818	AT5G59310	LTP4 (LIPID TRANSFER PROTEIN 4); lipid binding	2.1536	4.44937	7.50603	181.777	21.2236	3.32337e-09	9.4e-07
256252_at	11352	AT3G11340	UDP-glucoronosyl/UDP-glucosyl transferase family protein	2.14466	4.42189	6.58147	95.7678	19.5265	7.11268e-09	1.57515e-06
263096_at	18196	AT2G16060	AHB1 (ARABIDOPSIS HEMOGLOBIN 1)	2.13075	4.37946	7.04375	131.941	18.728	1.04027e-08	2.09987e-06
255895_at	10995	AT1G18020;AT1G17990	[AT1G18020, 12-oxophytodienoate reductase, putative];[AT1G17990, 12-oxophytodienoate reductase, putative]	2.12386	4.35858	8.56493	378.706	23.4848	1.31467e-09	5.26098e-07
264638_at	19738	AT1G65480	FT (FLOWERING LOCUS T)	2.09338	4.26745	7.59533	193.385	13.669	1.77745e-07	1.31078e-05
264434_at	19534	AT1G10340	ankyrin repeat family protein	2.086	4.2457	6.4351	86.5283	22.6787	1.81102e-09	6.23267e-07
263852_at	18952	AT2G04450	ATNUDT6 (Arabidopsis thaliana Nudix hydrolase homolog 6); ADP-ribose diphosphatase/ NAD binding / hydrolase	2.06896	4.19585	7.07376	134.714	12.9306	2.91235e-07	1.8309e-05
251065_at	6165	AT5G01870	lipid transfer protein, putative	2.05329	4.15053	9.86444	932.167	27.4979	3.08194e-10	1.92005e-07
248327_at	3427	AT5G52750	heavy-metal-associated domain-containing protein	2.01336	4.0372	6.06938	67.153	24.382	9.31847e-10	3.86463e-07
262229_at	17329	AT1G68620	similar to unknown protein [Arabidopsis thaliana] (TAIR:AT5G16080.1); similar to CXE carboxylesterase [Actinidia deliciosa] (GB:ABB89015.1); contains InterPro domain Esterase/lipase/thioesterase; (InterPro:IPR000379); contains InterPro domain Alpha/beta hydrolase fold-3; (InterPro:IPR013094)	1.99918	3.99774	7.25487	152.733	14.3007	1.18742e-07	1.01063e-05
264636_at	19736	AT1G65490	similar to unknown protein [Arabidopsis thaliana] (TAIR:AT1G65500.1)	1.98202	3.95047	9.59168	771.582	27.626	2.95276e-10	1.92005e-07
253046_at	8146	AT4G37370	CYP81D8 (cytochrome P450, family 81, subfamily D, polypeptide 8); oxygen binding	1.96089	3.89301	6.5011	90.5787	14.4255	1.09857e-07	9.63783e-06
267083_at	22183	AT2G41100	TCH3 (TOUCH 3); calmodulin protein	1.95805	3.88536	10.6206	1574.42	30.6032	1.1488e-10	1.04816e-07
264824_at	19924	AT1G03410;AT1G03420	[AT1G03410, 2A6]	1.9567	3.88174	7.81657	225.435	20.3072	4.97436e-09	1.20708e-06
260551_at	15651	AT2G43510	ATTI1 (ARABIDOPSIS THALIANA TRYPSIN INHIBITOR PROTEIN 1)	1.94303	3.84512	8.70898	418.471	25.4069	6.38249e-10	3.03301e-07
256818_at	11918	AT3G21420	oxidoreductase, 2OG-Fe(II) oxygenase family protein	1.93505	3.82391	8.19316	292.676	25.9229	5.30489e-10	2.68239e-07
252234_at	7334	AT3G49780	ATPSK4 (PHYTOSULFOKINE 4 PRECURSOR); growth factor	1.92794	3.80512	6.43879	86.7497	18.2829	1.29454e-08	2.36228e-06
267357_at	22457	AT2G40000	similar to unknown protein [Arabidopsis thaliana] (TAIR:AT3G55840.1); similar to putative Hs1pro-1-like receptor [Glycine max] (GB:AAG44839.1); contains InterPro domain Hs1pro-1, C-terminal; (InterPro:IPR009743); contains InterPro domain Hs1pro-1, N-terminal; (InterPro:IPR009869)	1.91935	3.78251	9.16892	575.599	22.1333	2.26352e-09	7.27197e-07
259550_at	14650	AT1G35230	AGP5 (ARABINOGALACTAN-PROTEIN 5)	1.90821	3.75342	6.33635	80.8037	14.6258	9.70934e-08	8.81346e-06
249983_at	5083	AT5G18470	curculin-like (mannose-binding) lectin family protein	1.90236	3.73823	5.74321	53.5646	20.4862	4.59123e-09	1.15084e-06
263539_at	18639	AT2G24850	TAT3 (TYROSINE AMINOTRANSFERASE 3); transaminase	1.87836	3.67657	5.73536	53.2741	12.9852	2.80541e-07	1.7984e-05
249377_at	4477	AT5G40690	similar to unknown protein [Arabidopsis thaliana] (TAIR:AT2G41730.1)	1.87584	3.67015	6.87459	117.343	27.177	3.43393e-10	2.00841e-07
253152_at	8252	AT4G35690	similar to unknown protein [Arabidopsis thaliana] (TAIR:AT4G35710.1); similar to hypothetical protein [Glycine max] (GB:AAK01735.1); contains InterPro domain Protein of unknown function DUF241, plant; (InterPro:IPR004320)	1.86985	3.65493	5.63893	49.8294	16.6692	2.99133e-08	4.08576e-06
263478_at	18578	AT2G31880	leucine-rich repeat transmembrane protein kinase, putative	1.86635	3.64608	9.59367	772.651	25.0771	7.1971e-10	3.28332e-07
245038_at	138	AT2G26560	PLP2 (PHOSPHOLIPASE A 2A); nutrient reservoir	1.85529	3.61826	6.15471	71.2448	16.0587	4.18989e-08	4.958e-06
253161_at	8261	AT4G35770	SEN1 (DARK INDUCIBLE 1)	1.85455	3.6164	11.7617	3472.46	22.7721	1.74407e-09	6.12033e-07
267300_at	22400	AT2G30140	UDP-glucoronosyl/UDP-glucosyl transferase family protein	1.83662	3.57172	7.02285	130.044	17.9132	1.55841e-08	2.66682e-06
246889_at	1989	AT5G25470	AP2/B3-like transcription factor	1.8336	3.56425	6.36309	82.3152	21.2797	3.24419e-09	9.4e-07
263295_at	18395	AT2G14210	ANR1; MADS box DNA binding / transcription factor	1.82934	3.55374	5.60386	48.633	17.9087	1.56193e-08	2.66682e-06
265111_at	20211	AT1G62510	protease inhibitor/seed storage/lipid transfer protein (LTP) family protein	1.82323	3.53872	6.98228	126.437	16.0778	4.14519e-08	4.95445e-06
257763_s_at	12863	AT3G23120;AT3G23110	[AT3G23120, leucine-rich repeat family protein];[AT3G23110, disease resistance family protein]	1.82288	3.53788	5.97847	63.0518	12.235	4.74921e-07	2.64218e-05
253666_at	8766	AT4G30270	MERI5B (MERISTEM-5); hydrolase, acting on glycosyl bonds	1.78659	3.44999	11.4128	2726.37	19.6341	6.76502e-09	1.52782e-06
259546_at	14646	AT1G35350	similar to SHB1 (SHORT HYPOCOTYL UNDER BLUE1) [Arabidopsis thaliana] (TAIR:AT4G25350.1); similar to EXS family protein / ERD1/XPR1/SYG1 family protein [Arabidopsis thaliana] (TAIR:AT1G26730.1); similar to unknown protein [Arabidopsis thaliana] (TAIR:AT1G14040.1); similar to SPX, N-terminal; EXS, C-terminal [Medicago truncatula] (GB:ABD32751.1); contains InterPro domain SPX, N-terminal; (InterPro:…	1.76714	3.40378	6.31379	79.5502	13.7579	1.67769e-07	1.25882e-05
260287_at	15387	AT1G80440	kelch repeat-containing F-box family protein	1.7664	3.40203	10.2703	1235.04	23.1934	1.47423e-09	5.60452e-07
256766_at	11866	AT3G22231	PCC1 (PATHOGEN AND CIRCADIAN CONTROLLED 1)	1.75948	3.38575	6.89885	119.333	16.7148	2.91826e-08	4.03427e-06
260772_at	15872	AT1G49050	aspartyl protease family protein	1.74093	3.34251	8.43438	345.94	21.4336	3.03717e-09	8.99712e-07
254573_at	9673	AT4G19420	pectinacetylesterase family protein	1.72654	3.30932	9.21084	592.568	16.7166	2.91551e-08	4.03427e-06
247604_at	2704	AT5G60950	phytochelatin synthetase-related	1.72466	3.30502	6.62122	98.4429	16.2081	3.85389e-08	4.80368e-06
263741_at	18841	AT2G20620	similar to unknown protein [Arabidopsis thaliana] (TAIR:AT4G29550.1); contains InterPro domain Protein of unknown function DUF626, Arabidopsis thaliana; (InterPro:IPR006462)	1.72322	3.30173	5.98473	63.3263	15.3273	6.37565e-08	6.50677e-06
249125_at	4225	AT5G43450	2-oxoglutarate-dependent dioxygenase, putative	1.72127	3.29725	7.83016	227.57	17.2694	2.17186e-08	3.37008e-06
260744_at	15844	AT1G15010	similar to unknown protein [Arabidopsis thaliana] (TAIR:AT2G01300.1); similar to Os01g0121500 [Oryza sativa (japonica cultivar-group)] (GB:NP_001041876.1); similar to Os01g0121600 [Oryza sativa (japonica cultivar-group)] (GB:NP_001041877.1)	1.71891	3.29188	6.11068	69.1031	27.6468	2.93234e-10	1.92005e-07
245460_at	560	AT4G16990	disease resistance protein (TIR-NBS class), putative	1.71791	3.28959	5.94784	61.7273	18.5192	1.15189e-08	2.22666e-06
253414_at	8514	AT4G33050	EDA39 (embryo sac development arrest 39); calmodulin binding	1.7177	3.28912	7.77821	219.521	19.7725	6.34529e-09	1.46198e-06
249384_at	4484	AT5G39890	similar to unknown protein [Arabidopsis thaliana] (TAIR:AT5G15120.1); similar to unknown protein [Oryza sativa (japonica cultivar-group)] (GB:BAB03364.1); similar to Os01g0185500 [Oryza sativa (japonica cultivar-group)] (GB:NP_001042241.1); contains InterPro domain Protein of unknown function DUF1637; (InterPro:IPR012864); contains InterPro domain Cupin, RmlC-type; (InterPro:IPR011051)	1.70075	3.25071	7.53282	185.185	12.3904	4.24864e-07	2.45346e-05
249467_at	4567	AT5G39610	ANAC092/ATNAC2/ATNAC6 (Arabidopsis NAC domain containing protein 92); protein heterodimerization/ protein homodimerization/ transcription factor	1.68866	3.22357	7.19085	146.103	11.4768	8.33193e-07	4.06962e-05
260101_at	15201	AT1G73260	trypsin and protease inhibitor family protein / Kunitz family protein	1.68753	3.22104	6.24189	75.6825	21.8727	2.52274e-09	7.77618e-07
253874_at	8974	AT4G27450	similar to unknown protein [Arabidopsis thaliana] (TAIR:AT3G15450.1); similar to unknown [Glycine max] (GB:AAG00940.1); contains domain no description (G3D.3.60.20.10); contains domain N-terminal nucleophile aminohydrolases (Ntn hydrolases) (SSF56235)	1.68642	3.21857	11.1457	2265.69	27.4684	3.11262e-10	1.92005e-07
258791_at	13891	AT3G04720	PR4 (PATHOGENESIS-RELATED 4)	1.68536	3.21621	7.3391	161.916	15.1022	7.28246e-08	7.28565e-06
262085_at	17185	AT1G56060	similar to unknown protein [Arabidopsis thaliana] (TAIR:AT2G32190.1); similar to conserved hypothetical protein [Medicago truncatula] (GB:ABD32591.1)	1.68363	3.21234	6.69092	103.316	14.0452	1.3951e-07	1.10879e-05
255952_at	11052	AT1G22130	AGL104; MADS-box transcription factor family protein	1.66721	3.176	5.55658	47.0649	19.0301	8.99294e-09	1.86481e-06
254101_at	9201	AT4G25000	AMY1 (ALPHA-AMYLASE-LIKE); alpha-amylase	1.66052	3.16131	7.7919	221.613	14.9965	7.7567e-08	7.62631e-06
256366_at	11466	AT1G66880	serine/threonine protein kinase family protein	1.6503	3.13898	7.07999	135.297	18.2637	1.30697e-08	2.36603e-06
262482_at	17582	AT1G17020	SRG1 (SENESCENCE-RELATED GENE 1); oxidoreductase, acting on paired donors, with incorporation or reduction of molecular oxygen, 2-oxoglutarate as one donor, and incorporation of one atom each of oxygen into both donors	1.63942	3.11541	6.06942	67.1549	20.1908	5.24214e-09	1.25867e-06
254869_at	9969	AT4G11890	protein kinase family protein	1.63861	3.11366	5.10789	34.4849	8.21628	1.44703e-05	0.000317678
261892_at	16992	AT1G80840	WRKY40 (WRKY DNA-binding protein 40); transcription factor	1.63011	3.09538	6.25327	76.282	24.8166	7.92202e-10	3.47503e-07
245760_s_at	860	AT1G66920;AT1G66910	[AT1G66920, serine/threonine protein kinase, putative];[AT1G66910, protein kinase, putative]	1.62295	3.08004	6.14726	70.8778	22.8167	1.71306e-09	6.12033e-07
249417_at	4517	AT5G39670	calcium-binding EF hand family protein	1.62157	3.07709	5.53154	46.2551	18.0984	1.41944e-08	2.50989e-06
259629_at	14729	AT1G56510	disease resistance protein (TIR-NBS-LRR class), putative	1.61977	3.07327	6.06473	66.9371	12.2546	4.68241e-07	2.61139e-05
253061_at	8161	AT4G37610	BT5 (BTB and TAZ domain protein 5); protein binding / transcription regulator	1.61931	3.07229	9.87097	936.393	27.0643	3.56788e-10	2.03459e-07
247072_at	2172	AT5G66490	similar to unknown protein [Arabidopsis thaliana] (TAIR:AT3G50900.1); similar to hypothetical protein [Thellun (GB:ABB45855.1)	1.61363	3.0602	7.90013	238.878	22.795	1.72805e-09	6.12033e-07
259502_at	14602	AT1G15670	kelch repeat-containing F-box family protein	1.61331	3.05952	10.2571	1223.78	24.7041	8.25975e-10	3.55481e-07
245136_at	236	AT2G45210	SAUR36; auxin-responsive protein-related	1.61263	3.05808	6.29624	78.5882	17.6771	1.75775e-08	2.88448e-06
262118_at	17218	AT1G02850	glycosyl hydrolase family 1 protein	1.61258	3.05798	9.09681	547.536	18.6577	1.07643e-08	2.13507e-06
252037_at	7137	AT3G51920	CAM9 (CALMODULIN 9); calcium ion binding	1.60633	3.04476	8.82211	452.606	20.7746	4.04082e-09	1.0474e-06
246099_at	1199	AT5G20230	ATBCB (ARABIDOPSIS BLUE-COPPER-BINDING PROTEIN); copper ion binding	1.60522	3.04243	10.1673	1149.89	19.8526	6.11579e-09	1.42348e-06
252131_at	7231	AT3G50930	AAA-type ATPase family protein	1.60408	3.04002	5.75996	54.1902	15.8235	4.78609e-08	5.40449e-06
267168_at	22268	AT2G37770	aldo/keto reductase family protein	1.60159	3.03479	8.06441	267.689	15.3688	6.22243e-08	6.45152e-06
254657_s_at	9757	AT4G18220;AT4G18210	[AT4G18220, purine permease family protein];[AT4G18210, ATPUP10 (Arabidopsis thaliana purine permease 10); purine transporter]	1.60037	3.03222	7.14931	141.957	18.3106	1.27681e-08	2.36228e-06
247869_at	2969	AT5G57520	ZFP2 (ZINC FINGER PROTEIN 2); nucleic acid binding / transcription factor/ zinc ion binding	1.59187	3.0144	5.93619	61.2308	14.0255	1.41268e-07	1.11874e-05
257382_at	12482	AT2G40750	WRKY54 (WRKY DNA-binding protein 54); transcription factor	1.58964	3.00975	7.46653	176.868	22.3797	2.04521e-09	6.86047e-07
262082_s_at	17182	AT1G56140;AT1G56130;AT1G56120	[AT1G56140, leucine-rich repeat family protein / protein kinase family protein];[AT1G56130, leucine-rich repeat family protein / protein kinase family protein];[AT1G56120, leucine-rich repeat family protein / protein kinase family protein]	1.58712	3.00449	8.62812	395.66	22.1987	2.20315e-09	7.17913e-07
250798_at	5898	AT5G05340	peroxidase, putative	1.58017	2.99005	5.85896	58.0392	16.7593	2.8489e-08	4.01752e-06
252367_at	7467	AT3G48360	BT2 (BTB and TAZ domain protein 2); protein binding / transcription regulator	1.57934	2.98834	9.69189	827.083	18.7952	1.00688e-08	2.05062e-06
266292_at	21392	AT2G29350	SAG13 (Senescence-associated gene 13); oxidoreductase	1.57291	2.97505	6.98444	126.627	13.2596	2.33006e-07	1.57691e-05
264299_s_at	19399	AT1G78850;AT1G78860	[AT1G78850, curculin-like (mannose-binding) lectin family protein];[AT1G78860, curculin-like (mannose-binding) lectin family protein]	1.5711	2.97131	7.56813	189.772	18.2366	1.32472e-08	2.37928e-06
257264_at	12364	AT3G22060	receptor protein kinase-related	1.57036	2.96978	7.58914	192.557	17.0564	2.43015e-08	3.64533e-06
254197_at	9297	AT4G24040	ATTRE1 (TREHALASE 1); trehalase	1.56866	2.96629	10.1389	1127.46	25.4955	6.18136e-10	2.99993e-07
246302_at	1402	AT3G51860	CAX3 (cation exchanger 3); cation:cation antiporter	1.56747	2.96384	10.4545	1403.16	25.8679	5.40946e-10	2.68239e-07
266327_at	21427	AT2G46680	ATHB-7 (ARABIDOPSIS THALIANA HOMEOBOX 7); transcription factor	1.56221	2.95306	7.91394	241.175	20.5326	4.49739e-09	1.1418e-06
256933_at	12033	AT3G22600	protease inhibitor/seed storage/lipid transfer protein (LTP) family protein	1.55898	2.94646	7.13952	140.996	25.0026	7.39662e-10	3.30817e-07
261986_s_at	17086	AT1G33730;AT1G33720	[AT1G33730, CYP76C5 (cytochrome P450, family 76, subfamily C, polypeptide 5); oxygen binding];[AT1G33720, CYP76C6 (cytochrome P450, family 76, subfamily C, polypeptide 6); oxygen binding]	1.54969	2.92755	5.59282	48.2622	14.2145	1.25337e-07	1.04723e-05
248606_at	3706	AT5G49450	bZIP1; bZIP family transcription factor	1.54393	2.91587	9.02341	520.375	21.9173	2.4762e-09	7.73727e-07
260556_at	15656	AT2G43620	chitinase, putative	1.52683	2.88151	7.38723	167.409	17.6229	1.80744e-08	2.90354e-06
247866_at	2966	AT5G57550	XTR3 (XYLOGLUCAN ENDOTRANSGLYCOSYLASE 3); hydrolase, acting on glycosyl bonds	1.52287	2.87362	6.07162	67.2572	14.6723	9.43672e-08	8.78578e-06
256569_at	11669	AT3G19550	similar to expressed protein [Oryza sativa (japonica cultivar-group)] (GB:ABA98694.1); similar to Os12g0507700 [Oryza sativa (japonica cultivar-group)] (GB:NP_001066848.1)	1.52157	2.87104	8.35016	326.323	20.4493	4.6674e-09	1.15721e-06
259428_at	14528	AT1G01560	ATMPK11 (Arabidopsis thaliana MAP kinase 11); MAP kinase/ kinase	1.51374	2.8555	5.85447	57.8592	14.1757	1.28442e-07	1.06124e-05
245528_at	628	AT4G15530	PPDK (PYRUVATE ORTHOPHOSPHATE DIKINASE); kinase/ pyruvate, phosphate dikinase	1.50393	2.83615	8.42878	344.601	17.9097	1.56114e-08	2.66682e-06
252993_at	8093	AT4G38540	monooxygenase, putative (MO2)	1.50188	2.83212	7.00819	128.729	13.8798	1.5507e-07	1.19903e-05
265511_at	20611	AT2G05540	glycine-rich protein	1.50146	2.8313	11.4188	2737.79	12.8175	3.14808e-07	1.9498e-05
248551_at	3651	AT5G50200	WR3 (WOUND-RESPONSIVE 3); nitrate transporter	1.50006	2.82855	7.22448	149.55	11.9085	6.02637e-07	3.11704e-05
259385_at	14485	AT1G13470	similar to unknown protein [Arabidopsis thaliana] (TAIR:AT1G13520.1); similar to hypothetical protein [Oryza sativa (japonica cultivar-group)] (GB:BAC99699.1); contains InterPro domain Protein of unknown function DUF1262; (InterPro:IPR010683)	1.4896	2.80812	4.98511	31.6715	14.281	1.20213e-07	1.01183e-05
248622_at	3722	AT5G49360	BXL1 (BETA-XYLOSIDASE 1); hydrolase, hydrolyzing O-glycosyl compounds	1.4838	2.79684	11.1694	2303.16	13.437	2.07018e-07	1.45543e-05
262047_at	17147	AT1G80160	lactoylglutathione lyase family protein / glyoxalase I family protein	1.47707	2.78382	9.03412	524.253	11.2075	1.0254e-06	4.72351e-05
245148_at	248	AT2G45220	pectinesterase family protein	1.47154	2.77317	6.1255	69.8167	8.67202	9.22828e-06	0.000228229
253099_s_at	8199	AT4G37530;AT4G37520	[AT4G37530, peroxidase, putative];[AT4G37520, peroxidase 50 (PER50) (P50) (PRXR2)]	1.46853	2.7674	8.03792	262.819	21.5774	2.85702e-09	8.57481e-07
245264_at	364	AT4G17245	RING-U box zinc finger (C3HC4-type RING finger) family protein	1.46782	2.76604	8.72912	424.353	7.60849	2.72003e-05	0.000513608
262177_at	17277	AT1G74710	ICS1 (ISOCHORISMATE SYNTHASEI); isochorismate synthase	1.46584	2.76224	7.31691	159.445	16.6048	3.09789e-08	4.13233e-06
267546_at	22646	AT2G32680	disease resistance family protein	1.46431	2.75932	6.07464	67.3982	12.9975	2.78209e-07	1.79264e-05
249777_at	4877	AT5G24210	lipase class 3 family protein	1.46376	2.75827	6.98518	126.692	20.3361	4.91019e-09	1.20432e-06
267115_s_at	22215	AT2G32540;AT2G32530	[AT2G32540, ATCSLB04 (Cellulose synthase-like B4); transferase/ transferase, transferring glycosyl groups];[AT2G32530, ATCSLB03 (Cellulose synthase-like B3); transferase/ transferase, transferring glycosyl groups]	1.46153	2.754	8.54702	374.033	22.8244	1.70775e-09	6.12033e-07
247024_at	2124	AT5G66985	unknown protein	1.45291	2.73759	5.35673	40.9767	11.9508	5.84144e-07	3.04895e-05
255807_at	10907	AT4G10270	wound-responsive family protein	1.45247	2.73676	8.99063	508.687	10.9491	1.25666e-06	5.46508e-05
250279_at	5379	AT5G13200	GRAM domain-containing protein / ABA-responsive protein-related	1.44532	2.72324	6.80718	111.987	19.4114	7.50621e-09	1.64163e-06
255116_at	10216	AT4G08850	leucine-rich repeat family protein / protein kinase family protein	1.44432	2.72134	7.95932	248.883	17.6228	1.80755e-08	2.90354e-06
263783_at	18883	AT2G46400	WRKY46 (WRKY DNA-binding protein 46); transcription factor	1.44258	2.71807	6.51884	91.6993	17.2552	2.18806e-08	3.37227e-06
251293_at	6393	AT3G61930	unknown protein	1.43783	2.70914	6.98122	126.345	13.1888	2.44351e-07	1.63931e-05
247327_at	2427	AT5G64120	peroxidase, putative	1.43464	2.70315	6.34342	81.2005	18.6777	1.066e-08	2.13293e-06
249719_at	4819	AT5G35735	auxin-responsive family protein	1.4345	2.70289	7.71155	209.608	14.553	1.01534e-07	9.08234e-06
251084_at	6184	AT5G01520	AIRP2; zinc finger (C3HC4-type RING finger) family protein	1.42217	2.67988	7.27629	155.018	20.5287	4.50513e-09	1.1418e-06
263776_s_at	18876	AT2G46430;AT2G46440	[AT2G46430, ATCNGC3 (CYCLIC NUCLEOTIDE GATED CHANNEL 3); calmodulin binding / cyclic nucleotide binding / ion channel];[AT2G46440, ATCNGC11 (cyclic nucleotide gated channel 11); calmodulin binding / cyclic nucleotide binding / ion channel]	1.411	2.65922	6.33648	80.8108	11.8586	6.25311e-07	3.19806e-05
256431_s_at	11531	AT3G11010;AT5G27060	[AT3G11010, disease resistance family protein / LRR family protein];[AT5G27060, disease resistance family protein]	1.41004	2.65745	5.33979	40.4982	14.8449	8.49743e-08	8.13537e-06
259560_at	14660	AT1G21270	WAK2 (wall-associated kinase 2); protein serine/threonine kinase	1.40406	2.64644	6.25482	76.3638	12.21	4.83542e-07	2.67709e-05
250435_at	5535	AT5G10380	ATL55; zinc finger (C3HC4-type RING finger) family protein	1.40269	2.64395	9.09544	547.018	21.1263	3.46601e-09	9.41187e-07
258983_at	14083	AT3G08860	alanine--glyoxylate aminotransferase, putative / beta-alanine-pyruvate aminotransferase, putative / AGT, putative	1.40175	2.64222	5.7833	55.074	10.0062	2.73835e-06	9.68399e-05
247925_at	3025	AT5G57560	TCH4 (TOUCH 4); hydrolase, acting on glycosyl bonds	1.39896	2.63711	9.12323	557.657	17.2275	2.22009e-08	3.37602e-06
262381_at	17481	AT1G72900	disease resistance protein (TIR-NBS class), putative	1.39661	2.63282	5.38284	41.7249	16.3845	3.49522e-08	4.47898e-06
253182_at	8282	AT4G35190	similar to unknown protein [Arabidopsis thaliana] (TAIR:AT2G37210.1); similar to Conserved hypothetical protein 730 [Medicago truncatula] (GB:ABD32794.1); contains InterPro domain Conserved hypothetical protein 730; (InterPro:IPR005269)	1.37981	2.60235	7.97495	251.593	13.5913	1.87011e-07	1.34991e-05
251705_at	6805	AT3G56400	WRKY70 (WRKY DNA-binding protein 70); transcription factor	1.3766	2.59657	9.12759	559.344	18.4828	1.17272e-08	2.22914e-06
253048_at	8148	AT4G37560	formamidase, putative / formamide amidohydrolase, putative	1.3757	2.59494	7.90415	239.545	21.8377	2.56008e-09	7.78605e-07
267262_at	22362	AT2G22990	SNG1 (SINAPOYLGLUCOSE 1); serine carboxypeptidase	1.36872	2.58242	10.4982	1446.3	21.1956	3.36378e-09	9.4e-07
246293_at	1393	AT3G56710	SIB1 (SIGMA FACTOR BINDING PROTEIN 1); binding	1.36362	2.57331	6.44975	87.4113	11.7396	6.83209e-07	3.4326e-05
247819_at	2919	AT5G58350	WNK4 (Arabidopsis WNK kinase 4); kinase	1.36284	2.57191	7.72564	211.666	15.8256	4.78034e-08	5.40449e-06
265136_at	20236	AT1G51270	structural molecule	1.36155	2.56961	4.96714	31.2793	15.9876	4.36102e-08	5.02398e-06
265597_at	20697	AT2G20142;AT2G20145	[AT2G20142, unknown protein];[AT2G20145, Toll-Interleukin-Resistance (TIR) domain-containing protein]	1.35397	2.55615	5.32014	39.9503	12.9778	2.81964e-07	1.80157e-05
254385_s_at	9485	AT4G21830;AT4G21840	[AT4G21830, methionine sulfoxide reductase domain-containing protein / SeIR domain-containing protein];[AT4G21840, methionine sulfoxide reductase domain-containing protein / SelR domain-containing protein]	1.35225	2.55309	5.47192	44.3824	16.6226	3.06796e-08	4.13233e-06
248932_at	4032	AT5G46050	ATPTR3/PTR3 (PEPTIDE TRANSPORTER PROTEIN 3); transporter	1.35008	2.54926	7.2372	150.874	15.1625	7.02655e-08	7.0606e-06
264524_at	19624	AT1G10070	ATBCAT-2; branched-chain-amino-acid transaminase/ catalytic	1.34846	2.54641	7.09757	136.956	22.2846	2.1266e-09	7.03011e-07
246943_at	2043	AT5G25440	protein kinase family protein	1.34843	2.54635	6.21946	74.515	21.1569	3.42043e-09	9.4e-07
258395_at	13495	AT3G15500	ATNAC3 (ARABIDOPSIS NAC DOMAIN CONTAINING PROTEIN 55); transcription factor	1.3477	2.54505	8.19723	293.503	15.5307	5.66283e-08	6.03594e-06
247954_at	3054	AT5G56870	beta-galactosidase, putative / lactase, putative	1.34394	2.53843	10.8371	1829.31	14.6804	9.3902e-08	8.7783e-06
256425_at	11525	AT1G33560	ADR1 (ACTIVATED DISEASE RESISTANCE 1)	1.33513	2.52298	7.17352	144.36	16.7625	2.84411e-08	4.01752e-06
264624_at	19724	AT1G08930	ERD6 (EARLY RESPONSE TO DEHYDRATION 6); carbohydrate transporter/ sugar porter	1.32932	2.51284	8.60712	389.944	19.5982	6.87875e-09	1.53828e-06
264280_at	19380	AT1G61820	BGLU46; hydrolase, hydrolyzing O-glycosyl compounds	1.32791	2.51039	7.21232	148.294	16.029	4.26027e-08	4.958e-06
254231_at	9331	AT4G23810	WRKY53 (WRKY DNA-binding protein 53); transcription factor	1.32546	2.50612	7.00925	128.823	11.973	5.74679e-07	3.03436e-05
266071_at	21171	AT2G18680	similar to unknown protein [Arabidopsis thaliana] (TAIR:AT2G18690.1); similar to Os08g0107100 [Oryza sativa (japonica cultivar-group)] (GB:NP_001060795.1); similar to conserved hypothetical protein [Medicago truncatula] (GB:ABE90086.1)	1.32187	2.49991	4.97033	31.3486	16.3016	3.65902e-08	4.58584e-06
260046_at	15146	AT1G73800	calmodulin-binding protein	1.31249	2.4837	5.53097	46.2367	12.1608	5.01077e-07	2.76077e-05
262603_at	17703	AT1G15380	lactoylglutathione lyase family protein / glyoxalase I family protein	1.31234	2.48344	8.70327	416.816	11.2841	9.66197e-07	4.53662e-05
246831_at	1931	AT5G26340	MSS1 (SUGAR TRANSPORT PROTEIN 13); carbohydrate transporter/ hexose:hydrogen symporter/ high-affinity hydrogen:glucose transporter/ sugar porter	1.29659	2.45647	8.56505	378.736	15.5458	5.6132e-08	6.01114e-06
251272_at	6372	AT3G61890	ATHB-12 (ARABIDOPSIS THALIANA HOMEOBOX PROTEIN 1); transcription factor	1.2956	2.4548	7.35989	164.266	16.8529	2.70904e-08	3.88637e-06
252462_at	7562	AT3G47250	similar to unknown protein [Arabidopsis thaliana] (TAIR:AT3G47200.2); similar to hypothetical protein LOC_Os12g29620 [Oryza sativa (japonica cultivar-group)] (GB:ABA98257.1); similar to Os11g0543300 [Oryza sativa (japonica cultivar-group)] (GB:NP_001068043.1); similar to Os04g0505400 [Oryza sativa (japonica cultivar-group)] (GB:NP_001053253.1); contains InterPro domain Protein of unknown function…	1.29034	2.44586	8.58158	383.1	15.4659	5.87997e-08	6.14726e-06
262080_at	17180	AT1G59650	CW14	1.28979	2.44493	7.75583	216.141	21.1581	3.41865e-09	9.4e-07
250942_at	6042	AT5G03350	legume lectin family protein	1.28733	2.44075	9.98369	1012.49	16.4205	3.4265e-08	4.4329e-06
250099_at	5199	AT5G17300	RVE1; MYB family transcription factor	1.28506	2.43693	9.23437	602.313	16.1085	4.07449e-08	4.94357e-06
253506_at	8606	AT4G31980	similar to unknown protein [Arabidopsis thaliana] (TAIR:AT5G11290.1); similar to Plant protein of unknown function [Medicago truncatula] (GB:ABE78528.1); contains InterPro domain Protein of unknown function DUF862, eukaryotic; (InterPro:IPR008580); contains InterPro domain Protein of unknown function DUF247, plant; (InterPro:IPR004158)	1.28335	2.43403	6.49177	89.9947	14.6553	9.53528e-08	8.81346e-06
259133_at	14233	AT3G05400	sugar transporter, putative	1.28236	2.43236	8.16873	287.761	14.1234	1.3275e-07	1.08489e-05
253829_at	8929	AT4G28040	nodulin MtN21 family protein	1.28012	2.42859	6.99319	127.398	9.40314	4.65911e-06	0.000142459
257493_at	12593	AT1G48180	similar to unknown protein [Arabidopsis thaliana] (TAIR:AT1G51670.1); contains domain Cysteine proteinases (SSF54001)	1.27988	2.42818	5.97623	62.9541	8.29362	1.33886e-05	0.000299993
245277_at	377	AT4G15550	IAGLU (INDOLE-3-ACETATE BETA-D-GLUCOSYLTRANSFERASE); UDP-glycosyltransferase/ transferase, transferring glycosyl groups	1.27983	2.4281	7.44464	174.204	11.1271	1.09188e-06	4.9712e-05
246781_at	1881	AT5G27350	SFP1; carbohydrate transporter/ sugar porter	1.27888	2.42651	8.37672	332.386	13.0728	2.6429e-07	1.72241e-05
251054_at	6154	AT5G01540	lectin protein kinase, putative	1.27826	2.42546	6.20735	73.892	15.7328	5.04033e-08	5.5541e-06
254243_at	9343	AT4G23210	protein kinase family protein	1.27249	2.41579	5.36398	41.1832	13.6097	1.84772e-07	1.34653e-05
262916_at	18016	AT1G59700	ATGSTU16 (Arabidopsis thaliana Glutathione S-transferase (class tau) 16); glutathione transferase	1.27189	2.41478	7.43688	173.27	17.9028	1.56666e-08	2.66682e-06
247793_at	2893	AT5G58650	similar to unknown protein [Arabidopsis thaliana] (TAIR:AT3G47295.1)	1.2689	2.40978	8.51407	365.588	16.6767	2.97913e-08	4.08576e-06
265547_at	20647	AT2G28305	similar to unknown protein [Arabidopsis thaliana] (TAIR:AT2G37210.1); similar to Conserved hypothetical protein 730 [Medicago truncatula] (GB:ABE89044.1); contains InterPro domain Conserved hypothetical protein 730; (InterPro:IPR005269)	1.2655	2.4041	8.4547	350.847	19.3052	7.89114e-09	1.69359e-06
266583_at	21683	AT2G46220	similar to unknown protein [Arabidopsis thaliana] (TAIR:AT1G16320.1); similar to hypothetical protein Npun02005080 [Nostoc punctiforme PCC 73102] (GB:ZP_00108317.1); similar to Os05g0215600 [Oryza sativa (japonica cultivar-group)] (GB:NP_001054933.1); similar to Os04g0613300 [Oryza sativa (japonica cultivar-group)] (GB:NP_001053853.1); contains domain NTF2-like (SSF54427)	1.26547	2.40406	10.5432	1492.13	16.4898	3.29861e-08	4.34921e-06
258362_at	13462	AT3G14280	similar to hypothetical protein MtrDRAFT_AC157534g12v1 [Medicago truncatula] (GB:ABE86457.1)	1.26043	2.39567	5.77108	54.6094	10.7635	1.45802e-06	6.21634e-05
253993_at	9093	AT4G26070	MEK1 (mitogen-activated protein kinase kinase 1); MAP kinase kinase/ kinase	1.25974	2.39452	7.62905	197.957	13.7359	1.70175e-07	1.26439e-05
255381_at	10481	AT4G03510	RMA1 (Ring finger protein with Membrane Anchor 1); protein binding / ubiquitin-protein ligase/ zinc ion binding	1.25416	2.38528	8.90431	479.143	12.0218	5.54448e-07	2.96802e-05
253908_at	9008	AT4G27260	GH3.5/WES1; indole-3-acetic acid amido synthetase	1.25002	2.37845	10.5121	1460.4	14.6241	9.71914e-08	8.81346e-06
260475_at	15575	AT1G11080	SCPL31 (serine carboxypeptidase-like 31); serine carboxypeptidase	1.2465	2.37265	7.60416	194.572	12.3809	4.27731e-07	2.46377e-05
267592_at	22692	AT2G39710	aspartyl protease family protein	1.24489	2.37001	6.9361	122.455	14.3722	1.13561e-07	9.84914e-06
254948_at	10048	AT4G11000	ankyrin repeat family protein	1.24469	2.36968	7.23553	150.699	11.2937	9.59085e-07	4.51999e-05
260415_at	15515	AT1G69790	protein kinase, putative	1.23925	2.36076	6.43644	86.6089	13.0772	2.63514e-07	1.72228e-05
264774_at	19874	AT1G22890	similar to unknown protein [Arabidopsis thaliana] (TAIR:AT5G44568.1); contains domain FAMILY NOT NAMED (PTHR12953); contains domain SUBFAMILY NOT NAMED (PTHR12953:SF10)	1.22898	2.34401	9.85549	926.398	16.1461	3.98963e-08	4.8665e-06
256922_at	12022	AT3G19010	oxidoreductase, 2OG-Fe(II) oxygenase family protein	1.22437	2.33654	8.96255	498.881	14.0202	1.41744e-07	1.11874e-05
250287_at	5387	AT5G13330	RAP2.6L (related to AP2 6L); DNA binding / transcription factor	1.22065	2.33051	7.60612	194.836	16.6048	3.09773e-08	4.13233e-06
247554_at	2654	AT5G61010	ATEXO70E2 (EXOCYST SUBUNIT EXO70 FAMILY PROTEIN E2); protein binding	1.22013	2.32967	6.09236	68.2312	13.079	2.63191e-07	1.72228e-05
256603_at	11703	AT3G28270	AFL1; AT14A-LIKE1	1.21483	2.32114	9.16322	573.329	18.1913	1.35496e-08	2.41457e-06
267169_at	22269	AT2G37540	short-chain dehydrogenase/reductase (SDR) family protein	1.21432	2.32031	7.14403	141.439	12.3196	4.46909e-07	2.53688e-05
267230_at	22330	AT2G44080	ARL (ARGOS-LIKE)	1.21266	2.31765	7.62052	196.792	12.399	4.2225e-07	2.44455e-05
261873_at	16973	AT1G11350	S-locus lectin protein kinase family protein	1.21242	2.31726	7.04594	132.141	17.1527	2.30942e-08	3.4886e-06
251621_at	6721	AT3G57700	protein kinase, putative	1.21173	2.31615	5.46137	44.0593	13.9965	1.43904e-07	1.12799e-05
258923_at	14023	AT3G10450	SCPL7; serine carboxypeptidase	1.21101	2.315	7.06031	133.464	14.1703	1.28875e-07	1.06124e-05
263680_at	18780	AT1G26930	kelch repeat-containing F-box family protein	1.20853	2.31102	7.27566	154.95	12.9845	2.8068e-07	1.7984e-05
246523_at	1623	AT5G15850	COL1 (CONSTANS-LIKE 1); transcription factor/ zinc ion binding	1.20029	2.29786	9.73323	851.127	18.5	1.16285e-08	2.22895e-06
259752_at	14852	AT1G71040	multi-copper oxidase type I family protein	1.1966	2.292	9.00146	512.517	15.6924	5.15832e-08	5.62972e-06
259479_at	14579	AT1G19020	similar to unknown protein [Arabidopsis thaliana] (TAIR:AT3G48180.1); similar to conserved hypothetical protein [Medicago truncatula] (GB:ABE82379.1)	1.19384	2.28761	6.33709	80.8449	15.094	7.31813e-08	7.28936e-06
250478_at	5578	AT5G10250	phototropic-responsive protein, putative	1.18627	2.27564	5.4363	43.3001	13.8657	1.56486e-07	1.2059e-05
261177_at	16277	AT1G04770	male sterility MS5 family protein	1.18599	2.27519	8.16748	287.513	8.30322	1.32606e-05	0.000298297
249775_at	4875	AT5G24160	squalene monooxygenase 1,2 / squalene epoxidase 1,2 (SQP1,2)	1.18563	2.27463	8.95092	494.876	16.0351	4.24579e-08	4.958e-06
250286_at	5386	AT5G13320	PBS3 (AVRPPHB SUSCEPTIBLE 3)	1.18258	2.26983	7.20903	147.956	15.9916	4.35099e-08	5.02398e-06
264830_at	19930	AT1G03710	similar to unknown protein [Arabidopsis thaliana] (TAIR:AT4G03565.1); contains InterPro domain Arabidopsis thaliana cystatin-related protein; (InterPro:IPR006525)	1.17933	2.26471	9.02578	521.231	13.8042	1.62816e-07	1.23646e-05
246909_at	2009	AT5G25770	similar to Os06g0163200 [Oryza sativa (japonica cultivar-group)] (GB:NP_001056894.1); similar to unknown protein [Oryza sativa (japonica cultivar-group)] (GB:BAD67646.1); contains InterPro domain Esterase/lipase/thioesterase; (InterPro:IPR000379)	1.17669	2.26058	9.10797	551.789	18.5658	1.1259e-08	2.19502e-06
254343_at	9443	AT4G21990	APR3 (APS REDUCTASE 3)	1.17637	2.26008	9.656	806.765	12.5064	3.91271e-07	2.31815e-05
248050_at	3150	AT5G56100	glycine-rich protein / oleosin	1.17431	2.25685	8.4201	342.533	17.8078	1.64418e-08	2.75762e-06
249053_at	4153	AT5G44440	FAD-binding domain-containing protein	1.17374	2.25596	5.92867	60.9126	8.66302	9.30888e-06	0.000229552
260770_at	15870	AT1G49200	zinc finger (C3HC4-type RING finger) family protein	1.17357	2.25569	7.34507	162.588	6.86499	6.20913e-05	0.000952457
254975_at	10075	AT4G10500	oxidoreductase, 2OG-Fe(II) oxygenase family protein	1.17113	2.25187	5.93056	60.9925	11.2332	1.00516e-06	4.66012e-05
258930_at	14030	AT3G10040	HRA1 (HYPOXIA RESPONSE ATTENUATOR1); transcription factor	1.16919	2.24885	6.67134	101.923	8.79058	8.23457e-06	0.000210337
256789_at	11889	AT3G13672	seven in absentia (SINA) family protein	1.16811	2.24717	5.2809	38.8786	8.80029	8.15856e-06	0.000208796
262635_at	17735	AT1G06570	PDS1 (PHYTOENE DESATURATION 1)	1.16405	2.24085	9.3362	646.365	17.7091	1.72917e-08	2.85814e-06
249918_at	5018	AT5G19240	Identical to Putative GPI-anchored protein At5g19240 precursor [Arabidopsis Thaliana] (GB:Q84VZ5;GB:Q8H7A4); similar to unknown protein [Arabidopsis thaliana] (TAIR:AT5G19230.1); similar to Os07g0645000 [Oryza sativa (japonica cultivar-group)] (GB:NP_001060451.1); similar to unknown protein [Oryza sativa (japonica cultivar-group)] (GB:BAC07018.1); contains domain PR-1-like (SSF55797)	1.16144	2.2368	8.70333	416.834	15.2289	6.75576e-08	6.81854e-06
253806_at	8906	AT4G28270	zinc finger (C3HC4-type RING finger) family protein	1.16111	2.23629	8.36196	329.004	13.8207	1.61093e-07	1.23646e-05
259977_at	15077	AT1G76590	PLATZ transcription factor family protein	1.16044	2.23525	6.70604	104.405	11.8148	6.45957e-07	3.26844e-05
251196_at	6296	AT3G62950	glutaredoxin family protein	1.15467	2.22634	7.2477	151.976	9.11915	6.0434e-06	0.000170197
265670_s_at	20770	AT2G32190;AT2G32210	[AT2G32190, similar to unknown protein [Arabidopsis thaliana] (TAIR:AT2G32210.1); similar to conserved hypothetical protein [Medicago truncatula] (GB:ABD32591.1)];[AT2G32210, similar to unknown protein [Arabidopsis thaliana] (TAIR:AT2G32190.1); similar to conserved hypothetical protein [Medicago truncatula] (GB:ABD32591.1)]	1.15127	2.22109	6.19689	73.3583	7.8411	2.12696e-05	0.000421877
266761_at	21861	AT2G47130	short-chain dehydrogenase/reductase (SDR) family protein	1.14399	2.20992	6.23131	75.1295	12.5656	3.75283e-07	2.25863e-05
250293_s_at	5393	AT5G13370;AT5G13360	[AT5G13370, auxin-responsive GH3 family protein];[AT5G13360, auxin-responsive GH3 family protein]	1.14279	2.20808	5.55919	47.1501	8.89415	7.462e-06	0.000197555
247488_at	2588	AT5G61820	similar to hypothetical protein [Trifolium pratense] (GB:BAE71234.1); contains InterPro domain Stress up-regulated Nod 19; (InterPro:IPR011692)	1.13874	2.20188	10.7465	1718.03	13.4881	2.00151e-07	1.43567e-05
263482_at	18582	AT2G03980	GDSL-motif lipase/hydrolase family protein	1.13741	2.19986	8.15191	284.425	16.9348	2.59278e-08	3.79112e-06
267380_at	22480	AT2G26170	CYP711A1 (MORE AXILLARY BRANCHES 1); oxygen binding	1.13734	2.19974	8.34954	326.184	16.7471	2.86773e-08	4.01752e-06
264729_at	19829	AT1G22990	heavy-metal-associated domain-containing protein / copper chaperone (CCH)-related	1.13706	2.19933	7.18278	145.289	11.8973	6.07619e-07	3.1357e-05
266993_at	22093	AT2G39210	nodulin family protein	1.13697	2.19919	6.99042	127.153	10.6515	1.59655e-06	6.5854e-05
246854_at	1954	AT5G26200	mitochondrial substrate carrier family protein	1.13524	2.19655	6.29048	78.2751	6.37906	0.000110261	0.00146737
249890_at	4990	AT5G22570	WRKY38 (WRKY DNA-binding protein 38); transcription factor	1.13277	2.1928	5.08625	33.9715	12.9	2.97406e-07	1.85858e-05
256024_at	11124	AT1G58340	ZF14; transporter	1.13245	2.19231	6.38608	83.6374	7.54734	2.90442e-05	0.00054195
267028_at	22128	AT2G38470	WRKY33 (WRKY DNA-binding protein 33); transcription factor	1.13036	2.18914	6.83394	114.083	16.3506	3.56116e-08	4.49949e-06
252053_at	7153	AT3G52400	SYP122 (syntaxin 122); t-SNARE	1.12928	2.1875	6.28034	77.727	8.1055	1.61899e-05	0.000344489
257153_at	12253	AT3G27220	kelch repeat-containing protein	1.12711	2.18421	7.07158	134.511	9.3075	5.08196e-06	0.000151134
253632_at	8732	AT4G30430	TET9 (TETRASPANIN9)	1.12606	2.18262	5.44802	43.6532	12.7845	3.22086e-07	1.97494e-05
260637_at	15737	AT1G62380	ACO2 (ACC OXIDASE 2)	1.12362	2.17893	11.2625	2456.77	16.0881	4.12126e-08	4.95445e-06
257823_at	12923	AT3G25190	nodulin, putative	1.11838	2.17103	6.7475	107.448	9.20038	5.60625e-06	0.00016135
264590_at	19690	AT2G17710	similar to Os04g0560700 [Oryza sativa (japonica cultivar-group)] (GB:NP_001053549.1)	1.1159	2.16731	9.50381	725.99	14.4861	1.05809e-07	9.35468e-06
262733_s_at	17833	AT1G28660;AT1G28670	[AT1G28660, lipase, putative];[AT1G28670, ARAB-1 (Arabidopsis lipase); carboxylic ester hydrolase]	1.11353	2.16374	7.26444	153.75	13.1606	2.49046e-07	1.66504e-05
246018_at	1118	AT5G10695	similar to unknown protein [Arabidopsis thaliana] (TAIR:AT5G57123.1); similar to conserved hypothetical protein [Medicago truncatula] (GB:ABD28467.1); contains domain Glucocorticoid receptor-like (DNA-binding domain) (SSF57716)	1.11298	2.16292	7.64871	200.674	14.8397	8.52412e-08	8.13537e-06
247717_at	2817	AT5G59320	LTP3 (LIPID TRANSFER PROTEIN 3); lipid binding	1.11286	2.16275	8.28266	311.408	14.0593	1.38262e-07	1.10879e-05
264365_s_at	19465	AT1G03220;AT1G03230	[AT1G03220, extracellular dermal glycoprotein, putative / EDGP, putative];[AT1G03230, extracellular dermal glycoprotein, putative / EDGP, putative]	1.11119	2.16023	10.2273	1198.74	9.25157	5.34868e-06	0.000156817
267477_at	22577	AT2G02710	PAC motif-containing protein	1.11106	2.16005	10.3834	1335.76	17.0448	2.44514e-08	3.64533e-06
252117_at	7217	AT3G51430	YLS2 (yellow-leaf-specific gene 2); strictosidine synthase	1.11033	2.15896	8.69486	414.396	15.759	4.96528e-08	5.49797e-06
245392_at	492	AT4G15680	glutaredoxin family protein	1.10784	2.15523	8.97004	501.477	14.1072	1.34124e-07	1.08875e-05
258815_at	13915	AT3G04000	short-chain dehydrogenase/reductase (SDR) family protein	1.10357	2.14886	6.57701	95.4723	10.3919	1.97662e-06	7.6678e-05
263866_at	18966	AT2G36950	heavy-metal-associated domain-containing protein	1.09992	2.14343	9.07213	538.247	18.3389	1.25901e-08	2.35394e-06
254592_at	9692	AT4G18880	AT-HSFA4A (Arabidopsis thaliana heat shock transcription factor A4A); DNA binding / transcription factor	1.09751	2.13986	6.72783	105.994	13.0519	2.68077e-07	1.73717e-05
245859_at	959	AT5G28290	protein kinase, putative	1.09732	2.13957	7.65446	201.476	13.2213	2.39071e-07	1.60862e-05
267567_at	22667	AT2G30770	CYP71A13 (cytochrome P450, family 71, subfamily A, polypeptide 13); oxygen binding	1.09711	2.13926	5.86449	58.2624	6.19163	0.000138685	0.00176431
253779_at	8879	AT4G28490	HAESA (RECEPTOR-LIKE PROTEIN KINASE 5); ATP binding / kinase/ protein serine/threonine kinase	1.09136	2.13075	7.29319	156.844	13.2895	2.28385e-07	1.55506e-05
249004_at	4104	AT5G44570	unknown protein	1.09103	2.13026	5.02534	32.5669	11.3137	9.44349e-07	4.49699e-05
256050_at	11150	AT1G07000	ATEXO70B2 (exocyst subunit EXO70 family protein B2); protein binding	1.09092	2.1301	6.83689	114.317	15.4626	5.89108e-08	6.14726e-06
253872_at	8972	AT4G27410	RD26 (RESPONSIVE TO DESSICATION 26); transcription factor	1.09081	2.12993	8.06347	267.514	14.358	1.14565e-07	9.86121e-06
252976_s_at	8076	AT4G38550	similar to unknown protein [Arabidopsis thaliana] (TAIR:AT2G20950.3); similar to pEARLI 4 gene product (GB:AAC37472.1); contains InterPro domain Arabidopsis phospholipase-like; (InterPro:IPR007942)	1.08924	2.12763	8.24519	303.424	9.21489	5.53189e-06	0.000160334
267076_at	22176	AT2G41090	calmodulin-like calcium-binding protein, 22 kDa (CaBP-22)	1.08426	2.12029	10.8704	1872.01	13.8014	1.63113e-07	1.23646e-05
246821_at	1921	AT5G26920	calmodulin binding	1.08301	2.11845	5.56341	47.2883	6.99569	5.34633e-05	0.000851237
246260_at	1360	AT1G31820	amino acid permease family protein	1.08299	2.11842	5.70911	52.3136	7.44778	3.23451e-05	0.000585549
265387_at	20487	AT2G20670	similar to unknown protein [Arabidopsis thaliana] (TAIR:AT4G32480.1); similar to Protein of unknown function DUF506, plant [Medicago truncatula] (GB:ABD32359.1); contains InterPro domain Protein of unknown function DUF506, plant; (InterPro:IPR006502)	1.08214	2.11717	11.0762	2159.1	18.0094	1.48445e-08	2.60464e-06
266140_at	21240	AT2G28120	nodulin family protein	1.08189	2.1168	8.20849	295.802	15.4594	5.90202e-08	6.14726e-06
255666_at	10766	AT4G00390	DNA-binding storekeeper protein-related transcriptional regulator	1.07992	2.11391	6.35836	82.0461	13.6607	1.78717e-07	1.31078e-05
263800_at	18900	AT2G24600	ankyrin repeat family protein	1.07935	2.11309	5.73972	53.4353	9.2281	5.46513e-06	0.000159288
261265_at	16365	AT1G26800	zinc finger (C3HC4-type RING finger) family protein	1.0791	2.11271	7.99947	255.907	11.9606	5.79938e-07	3.04895e-05
263963_at	19063	AT2G36080	B3 DNA-binding domain transcription factor	1.07729	2.11008	8.52253	367.737	13.4332	2.07541e-07	1.45543e-05
264843_at	19943	AT1G03400	2-oxoglutarate-dependent dioxygenase, putative	1.07585	2.10797	8.20557	295.203	13.3581	2.18154e-07	1.50972e-05
255941_at	11041	AT1G20350	ATTIM17-1 (Arabidopsis thaliana translocase inner membrane subunit 17-1); protein translocase	1.07436	2.10578	6.38822	83.7619	10.9759	1.23022e-06	5.41959e-05
247358_at	2458	AT5G63580	flavonol synthase, putative	1.07177	2.10201	6.35092	81.6239	14.2445	1.22994e-07	1.03143e-05
252483_at	7583	AT3G46600	GRAS transcription factor family protein	1.06983	2.09919	8.94525	492.935	14.503	1.04713e-07	9.29377e-06
254229_at	9329	AT4G23610	similar to unknown protein [Arabidopsis thaliana] (TAIR:AT3G54200.1); similar to plant cell wall protein SlTFR88 [Lycopersicon esculentum] (GB:ABF39005.1)	1.06676	2.09473	5.21026	37.0208	14.8817	8.31039e-08	8.06639e-06
260983_at	16083	AT1G53560	similar to unknown protein [Arabidopsis thaliana] (TAIR:AT1G17080.1); similar to Os01g0667100 [Oryza sativa (japonica cultivar-group)] (GB:NP_001043806.1); similar to Os05g0564800 [Oryza sativa (japonica cultivar-group)] (GB:NP_001056334.1); similar to Os01g0242900 [Oryza sativa (japonica cultivar-group)] (GB:NP_001042559.1); contains domain 60S RIBOSOMAL PROTEIN L18A (PTHR10052); contains domain…	1.06515	2.09239	9.25676	611.734	14.5697	1.00496e-07	9.02482e-06
265214_at	20314	AT1G05000	tyrosine specific protein phosphatase family protein	1.06276	2.08892	6.51855	91.6812	10.5819	1.68982e-06	6.8953e-05
251039_at	6139	AT5G02020	similar to unknown protein [Arabidopsis thaliana] (TAIR:AT5G59080.1)	1.06263	2.08873	8.64171	399.405	12.7891	3.21067e-07	1.974e-05
262374_s_at	17474	AT1G72910;AT1G72930	[AT1G72910, disease resistance protein (TIR-NBS class), putative];[AT1G72930, TIR (TOLL/INTERLEUKIN-1 RECEPTOR-LIKE); transmembrane receptor]	1.06107	2.08648	9.7951	888.424	13.8009	1.63163e-07	1.23646e-05
257940_at	13040	AT3G21790	UDP-glucoronosyl/UDP-glucosyl transferase family protein	1.05942	2.08409	6.62067	98.406	15.4714	5.86086e-08	6.14726e-06
266313_at	21413	AT2G26980	CIPK3 (CBL-INTERACTING PROTEIN KINASE 3); kinase/ protein kinase	1.0589	2.08335	9.67301	816.332	17.8348	1.62171e-08	2.74009e-06
262803_at	17903	AT1G21000	PLATZ transcription factor family protein	1.05598	2.07913	8.85267	462.297	10.6813	1.55827e-06	6.48616e-05
247351_at	2451	AT5G63790	ANAC102 (Arabidopsis NAC domain containing protein 102); transcription factor	1.05176	2.07305	8.12834	279.818	9.57877	3.97956e-06	0.000126779
251342_at	6442	AT3G60690	auxin-responsive family protein	1.05084	2.07174	7.80885	224.233	12.4529	4.06388e-07	2.37685e-05
252996_s_at	8096	AT4G38460	GGR (GERANYLGERANYL REDUCTASE); farnesyltranstransferase	1.04906	2.06918	9.60161	776.915	15.6039	5.42794e-08	5.84016e-06
252068_at	7168	AT3G51440	strictosidine synthase family protein	1.04863	2.06857	6.1035	68.76	9.47963	4.34864e-06	0.000135324
254265_s_at	9365	AT4G23140;AT4G23160	[AT4G23140, CRK6 (CYSTEINE-RICH RLK 6); kinase];[AT4G23160, protein kinase family protein]	1.04732	2.06668	5.04006	32.9009	9.26549	5.28092e-06	0.000155229
262378_at	17478	AT1G72830	HAP2C (Heme activator protein (yeast) homolog 2C); transcription factor	1.04717	2.06648	6.84249	114.761	14.3634	1.14183e-07	9.86121e-06
254250_at	9350	AT4G23290	protein kinase family protein	1.04601	2.06481	5.60183	48.5643	8.88525	7.52523e-06	0.000198026
263956_at	19056	AT2G35940	BLH1 (BLH1); DNA binding / transcription factor	1.04439	2.06249	9.74813	859.962	10.3043	2.12662e-06	8.0229e-05
262644_at	17744	AT1G62710	BETA-VPE (vacuolar processing enzyme beta); cysteine-type endopeptidase	1.03994	2.05614	6.87662	117.509	11.8761	6.17257e-07	3.17789e-05
248197_at	3297	AT5G54190	PORA (Protochlorophyllide reductase A); oxidoreductase/ protochlorophyllide reductase	1.03679	2.05165	7.99143	254.484	15.7145	5.09359e-08	5.58581e-06
259015_at	14115	AT3G07350	similar to unknown protein [Arabidopsis thaliana] (TAIR:AT3G25240.1); similar to Os01g0915000 [Oryza sativa (japonica cultivar-group)] (GB:NP_001045184.1); similar to uncharacterized plant-specific domain TIGR01615 family protein, expressed [Oryza sativa (japonica cultivar-group)] (GB:ABA93251.2); contains InterPro domain Protein of unknown function DUF506, plant; (InterPro:IPR006502)	1.03556	2.0499	8.54694	374.011	12.3703	4.30977e-07	2.47622e-05
251882_at	6982	AT3G54140	proton-dependent oligopeptide transport (POT) family protein	1.03184	2.04463	8.13976	282.041	16.0507	4.20858e-08	4.958e-06
245349_at	449	AT4G16690	esterase/lipase/thioesterase family protein	1.03151	2.04417	10.3314	1288.47	15.641	5.31329e-08	5.77124e-06
248207_at	3307	AT5G53970	aminotransferase, putative	1.02811	2.03936	8.26084	306.733	14.7721	8.88041e-08	8.40507e-06
262454_at	17554	AT1G11190	BFN1 (BIFUNCTIONAL NUCLEASE I); nucleic acid binding	1.0266	2.03722	8.95992	497.973	14.5105	1.04225e-07	9.28657e-06
264238_at	19338	AT1G54740	similar to unknown protein [Arabidopsis thaliana] (TAIR:AT1G22110.1); similar to hypothetical protein [Oryza sativa (japonica cultivar-group)] (GB:BAD28434.1)	1.02642	2.03696	6.43664	86.6206	11.6097	7.53278e-07	3.72847e-05
252415_at	7515	AT3G47340	ASN1 (DARK INDUCIBLE 6)	1.02377	2.03322	10.9746	2012.3	9.19171	5.65125e-06	0.000162145
252450_s_at	7550	AT3G47090;AT3G47580	[AT3G47090, leucine-rich repeat transmembrane protein kinase, putative];[AT3G47580, leucine-rich repeat transmembrane protein kinase, putative]	1.02302	2.03217	5.27324	38.6725	9.01609	6.65269e-06	0.000183492
258038_at	13138	AT3G21260	GLTP3 (GLYCOLIPID TRANSFER PROTEIN 3)	1.02234	2.03121	8.01337	258.384	17.0075	2.49417e-08	3.6837e-06
267181_at	22281	AT2G37760	aldo/keto reductase family protein	1.02053	2.02867	9.26032	613.245	12.493	3.95009e-07	2.33424e-05
258244_at	13344	AT3G27770	similar to unknown protein [Arabidopsis thaliana] (TAIR:AT5G62960.1); similar to Os01g0171800 [Oryza sativa (japonica cultivar-group)] (GB:NP_001042148.1); similar to unknown protein [Oryza sativa (japonica cultivar-group)] (GB:BAD68261.1)	1.01853	2.02585	9.64893	802.821	12.0536	5.41719e-07	2.9143e-05
260461_at	15561	AT1G10980	similar to unknown protein [Arabidopsis thaliana] (TAIR:AT1G61670.1); similar to 12246 (GB:AAD21413.1); contains InterPro domain Lung seven transmembrane receptor; (InterPro:IPR009637)	1.01326	2.01846	9.17003	576.044	11.223	1.01312e-06	4.67797e-05
265713_at	20813	AT2G03530	UPS2 (UREIDE PERMEASE 2)	1.01321	2.0184	5.91194	60.2106	9.00372	6.73025e-06	0.000185183
266296_at	21396	AT2G29420	ATGSTU7 (GLUTATHIONE S-TRANSFERASE 25); glutathione transferase	1.01319	2.01837	9.34287	649.36	15.7764	4.91629e-08	5.49797e-06
258049_at	13149	AT3G16220	similar to nucleic acid binding [Arabidopsis thaliana] (TAIR:AT3G16230.1); similar to Os01g0231800 [Oryza sativa (japonica cultivar-group)] (GB:NP_001042498.1); similar to At3g16220-related [Medicago truncatula] (GB:ABE80927.1); similar to Os01g0231900 [Oryza sativa (japonica cultivar-group)] (GB:NP_001042499.1); contains InterPro domain Predicted eukaryotic LigT; (InterPro:IPR009210)	1.01174	2.01635	8.31996	319.563	14.0779	1.36639e-07	1.10362e-05
251066_at	6166	AT5G01880	zinc finger (C3HC4-type RING finger) family protein	1.00649	2.00901	8.3436	324.843	13.4298	2.0801e-07	1.45543e-05
253332_at	8432	AT4G33420	peroxidase, putative	1.00629	2.00873	5.44796	43.6516	12.9259	2.92174e-07	1.8309e-05
245757_at	857	AT1G35140	PHI-1 (PHOSPHATE-INDUCED 1)	1.00545	2.00757	5.95388	61.9862	11.6889	7.09659e-07	3.54208e-05
250152_at	5252	AT5G15120	similar to unknown protein [Arabidopsis thaliana] (TAIR:AT5G39890.1); similar to unknown protein [Oryza sativa (japonica cultivar-group)] (GB:BAB03364.1); similar to Os01g0185500 [Oryza sativa (japonica cultivar-group)] (GB:NP_001042241.1); contains InterPro domain Protein of unknown function DUF1637; (InterPro:IPR012864); contains InterPro domain Cupin, RmlC-type; (InterPro:IPR011051)	0.998897	1.99847	9.4217	685.826	8.87939	7.56709e-06	0.000198401
266265_at	21365	AT2G29340	short-chain dehydrogenase/reductase (SDR) family protein	0.998572	1.99802	8.819	451.631	16.8678	2.68742e-08	3.88637e-06
254432_at	9532	AT4G20830	FAD-binding domain-containing protein	0.997099	1.99598	7.98505	253.36	12.6982	3.42009e-07	2.08589e-05
259879_at	14979	AT1G76650	calcium-binding EF hand family protein	0.996165	1.99469	5.81081	56.1341	10.1853	2.35063e-06	8.70829e-05
256433_at	11533	AT3G10985	wound-responsive protein-related	0.989146	1.98501	10.229	1200.13	16.1491	3.98287e-08	4.8665e-06
267644_s_at	22744	AT2G32880;AT2G32870	[AT2G32880, meprin and TRAF homology domain-containing protein / MATH domain-containing protein];[AT2G32870, meprin and TRAF homology domain-containing protein / MATH domain-containing protein]	0.987589	1.98287	7.83267	227.965	8.82745	7.94996e-06	0.000205134
262947_at	18047	AT1G75750	GASA1 (GAST1 PROTEIN HOMOLOG 1)	0.987487	1.98273	13.105	8810.71	12.4676	4.02185e-07	2.3705e-05
249101_at	4201	AT5G43580	serine-type endopeptidase inhibitor	0.987388	1.98259	4.44686	21.8091	13.4401	2.06594e-07	1.45543e-05
259911_at	15011	AT1G72680	cinnamyl-alcohol dehydrogenase, putative	0.986928	1.98196	8.09363	273.165	14.8535	8.45307e-08	8.13537e-06
249494_at	4594	AT5G39050	transferase family protein	0.986141	1.98088	8.39394	336.378	12.1111	5.19477e-07	2.82799e-05
262412_at	17512	AT1G34760	GRF11 (General regulatory factor 11); amino acid binding / protein phosphorylated amino acid binding	0.985509	1.98001	6.24083	75.6269	14.4057	1.11217e-07	9.68266e-06
264826_at	19926	AT1G03410	2A6; 2-oxoglutarate (2OG) and Fe(II)-dependent oxygenase superfamily protein	0.983914	1.97782	5.03942	32.8865	9.39526	4.69244e-06	0.000143072
267093_at	22193	AT2G38170	CAX1 (CATION EXCHANGER 1); calcium:hydrogen antiporter	0.980791	1.97355	12.3173	5103.75	16.0329	4.25091e-08	4.958e-06
260396_at	15496	AT1G69720	HO3 (HEME OXYGENASE 3); heme oxygenase (decyclizing)	0.980311	1.97289	7.44297	174.003	13.439	2.06755e-07	1.45543e-05
266017_at	21117	AT2G18690	similar to unknown protein [Arabidopsis thaliana] (TAIR:AT2G18680.1); similar to Os08g0107100 [Oryza sativa (japonica cultivar-group)] (GB:NP_001060795.1); similar to conserved hypothetical protein [Medicago truncatula] (GB:ABE90086.1)	0.980131	1.97264	6.14702	70.8659	7.9605	1.87873e-05	0.000384685
253043_at	8143	AT4G37540	LOB domain protein 39 / lateral organ boundaries domain protein 39 (LBD39)	0.976976	1.96834	9.17257	577.058	14.7911	8.77843e-08	8.34317e-06
253298_at	8398	AT4G33560	similar to wound-responsive protein-related [Arabidopsis thaliana] (TAIR:AT2G14070.1)	0.976911	1.96825	5.91582	60.3726	14.6184	9.75309e-08	8.81346e-06
247582_at	2682	AT5G60760	2-phosphoglycerate kinase-related	0.976414	1.96757	7.72076	210.95	12.019	5.55609e-07	2.96802e-05
261211_at	16311	AT1G12780	UGE1 (UDP-D-glucose/UDP-D-galactose 4-epimerase 1); UDP-glucose 4-epimerase/ protein dimerization	0.972486	1.96222	12.254	4884.38	14.635	9.65487e-08	8.81346e-06
256324_at	11424	AT1G66760	MATE efflux family protein	0.971332	1.96065	8.90537	479.494	13.4046	2.11521e-07	1.47547e-05
263379_at	18479	AT2G40140	CZF1/ZFAR1; zinc finger CCCH domain transcription factor	0.970631	1.9597	8.82541	453.642	14.325	1.1695e-07	1.00287e-05
261979_at	17079	AT1G37130	NIA2 (NITRATE REDUCTASE 2)	0.967081	1.95488	11.0092	2061.09	9.31439	5.05014e-06	0.00015078
249306_at	4406	AT5G41400	zinc finger (C3HC4-type RING finger) family protein	0.966375	1.95392	6.62444	98.6632	7.60402	2.73307e-05	0.000515644
250182_at	5282	AT5G14470	GHMP kinase-related	0.965994	1.95341	5.69501	51.8048	9.00459	6.72475e-06	0.000185183
257624_at	12724	AT3G26220	CYP71B3 (cytochrome P450, family 71, subfamily B, polypeptide 3); oxygen binding	0.965235	1.95238	4.71541	26.2711	7.43921	3.26479e-05	0.000589627
260943_at	16043	AT1G45145	ATTRX5 (thioredoxin H-type 5); thiol-disulfide exchange intermediate	0.963667	1.95026	10.7192	1685.78	11.4234	8.67929e-07	4.20328e-05
255543_at	10643	AT4G01870	tolB protein-related	0.963595	1.95016	8.4368	346.522	8.41384	1.18787e-05	0.000272862
248713_at	3813	AT5G48180	AtNSP5; kelch repeat-containing protein	0.961183	1.94691	10.4594	1407.97	15.899	4.58503e-08	5.22923e-06
266511_at	21611	AT2G47680	zinc finger (CCCH type) helicase family protein	0.960698	1.94625	6.526	92.1554	10.4887	1.82443e-06	7.23743e-05
255723_at	10823	AT3G29575	similar to unknown protein [Arabidopsis thaliana] (TAIR:AT1G13740.1); similar to Os07g0602900 [Oryza sativa (japonica cultivar-group)] (GB:NP_001060209.1); similar to expressed protein [Oryza sativa (japonica cultivar-group)] (GB:ABF94628.1); similar to Os03g0419100 [Oryza sativa (japonica cultivar-group)] (GB:NP_001050378.1); contains InterPro domain Protein of unknown function DUF1675; (InterPr…	0.958054	1.94269	7.83479	228.301	13.8163	1.61548e-07	1.23646e-05
261576_at	16676	AT1G01070	nodulin MtN21 family protein	0.957729	1.94225	8.45665	351.321	6.98991	5.38158e-05	0.000854237
252250_at	7350	AT3G49790	similar to ATPP2-A10 (Phloem protein 2-A10) [Arabidopsis thaliana] (TAIR:AT1G10150.1); similar to hypothetical protein [Oryza sativa (japonica cultivar-group)] (GB:AAT85053.1); similar to Os03g0769900 [Oryza sativa (japonica cultivar-group)] (GB:NP_001051400.1); similar to expressed protein [Oryza sativa (japonica cultivar-group)] (GB:AAR87321.1); contains domain FAMILY NOT NAMED (PTHR21477); con…	0.957316	1.94169	7.75039	215.327	7.97491	1.85099e-05	0.000381057
248686_at	3786	AT5G48540	33 kDa secretory protein-related	0.957234	1.94158	7.24176	151.352	13.3563	2.18417e-07	1.50972e-05
247885_at	2985	AT5G57830	similar to unknown protein [Arabidopsis thaliana] (TAIR:AT4G30830.1); similar to Protein of unknown function DUF593 [Medicago truncatula] (GB:ABE79503.1); contains InterPro domain Protein of unknown function DUF593; (InterPro:IPR007656)	0.956354	1.9404	7.01271	129.133	8.29024	1.34339e-05	0.000300125
257061_at	12161	AT3G18250	putative membrane lipoprotein	0.95551	1.93927	6.13204	70.1337	10.5151	1.78508e-06	7.12583e-05
247356_at	2456	AT5G63800	BGAL6 (beta-galactosidase 6); beta-galactosidase	0.955019	1.9386	9.13653	562.821	11.3777	8.989e-07	4.30755e-05
254211_at	9311	AT4G23570	SGT1A (Suppressor of G2 (Two) 1A); binding	0.953292	1.93629	8.5216	367.499	15.3446	6.3114e-08	6.48482e-06
267624_at	22724	AT2G39660	BIK1 (BOTRYTIS-INDUCED KINASE1); kinase	0.951933	1.93446	7.80984	224.387	9.19977	5.60942e-06	0.00016135
265604_s_at	20704	AT3G35707;AT3G33225;AT2G14350	transposable element gene	0.951235	1.93353	4.77414	27.3628	8.77723	8.34044e-06	0.000211745
245325_at	425	AT4G14130	XTR7 (XYLOGLUCAN ENDOTRANSGLYCOSYLASE 7); hydrolase, acting on glycosyl bonds	0.950732	1.93285	9.28932	625.698	9.52628	4.17047e-06	0.000131034
263046_at	18146	AT2G05380	GRP3S (GLYCINE-RICH PROTEIN 3 SHORT ISOFORM)	0.950474	1.93251	10.7642	1739.23	8.78334	8.2918e-06	0.000211089
263799_at	18899	AT2G24550	similar to unknown protein [Arabidopsis thaliana] (TAIR:AT4G31510.1); similar to putative KID-containing protein [Brassica napus] (GB:AAO53442.1)	0.949376	1.93104	7.32087	159.883	10.4846	1.83064e-06	7.24945e-05
265135_at	20235	AT1G51270	structural molecule	0.946556	1.92727	5.42902	43.0822	12.8375	3.10506e-07	1.93515e-05
258110_at	13210	AT3G14610	CYP72A7 (cytochrome P450, family 72, subfamily A, polypeptide 7); oxygen binding	0.946391	1.92705	7.08964	136.205	10.0177	2.71132e-06	9.6033e-05
248374_at	3474	AT5G51870	AGL71; MADS domain transcription factor	0.945863	1.92634	6.00825	64.367	13.0997	2.59511e-07	1.71127e-05
252495_at	7595	AT3G46770	B3 transcription factor family protein	0.945253	1.92553	8.84077	458.499	6.18907	0.000139125	0.00176835
258487_at	13587	AT3G02550	LOB domain protein 41 / lateral organ boundaries domain protein 41 (LBD41)	0.944783	1.9249	11.0136	2067.46	9.24606	5.37577e-06	0.000157207
245711_at	811	AT5G04340	ZAT6; C2H2 nucleic acid binding / transcription factor/ zinc ion binding	0.944461	1.92447	6.6948	103.594	9.95028	2.87334e-06	0.000100523
257129_at	12229	AT3G20100	CYP705A19 (cytochrome P450, family 705, subfamily A, polypeptide 19); oxygen binding	0.940568	1.91928	9.88588	946.122	13.2983	2.27046e-07	1.55057e-05
248118_at	3218	AT5G55050	GDSL-motif lipase/hydrolase family protein	0.939273	1.91756	6.20984	74.0198	14.0545	1.38681e-07	1.10879e-05
264467_at	19567	AT1G10140	similar to unknown protein [Arabidopsis thaliana] (TAIR:AT1G58420.1); similar to Os07g0123800 [Oryza sativa (japonica cultivar-group)] (GB:NP_001058800.1); similar to Os03g0769700 [Oryza sativa (japonica cultivar-group)] (GB:NP_001051398.1); similar to hypothetical protein MtrDRAFT_AC140720g19v1 [Medicago truncatula] (GB:ABE79597.1)	0.937424	1.91511	6.42505	85.9277	6.45879	0.000100148	0.00136055
255630_at	10730	AT4G00700	MCTP9; C2 domain-containing protein	0.936998	1.91454	5.25193	38.1055	6.29263	0.000122493	0.00159971
261564_at	16664	AT1G01720	ATAF1 (Arabidopsis NAC domain containing protein 2); transcription factor	0.935368	1.91238	9.968	1001.54	12.6183	3.61645e-07	2.19392e-05
262072_at	17172	AT1G59590	ZCF37	0.931077	1.9067	5.71144	52.3978	15.7637	4.9521e-08	5.49797e-06
247921_at	3021	AT5G57660	COL5, CONSTANS-LIKE 5; BBX6; zinc finger (B-box type) family protein	0.930447	1.90587	9.89976	955.27	13.7765	1.65752e-07	1.24779e-05
246463_at	1563	AT5G16970	AT-AER (ALKENAL REDUCTASE); 2-alkenal reductase	0.930268	1.90563	7.30205	157.81	10.7266	1.50215e-06	6.31012e-05
260303_at	15403	AT1G70520	protein kinase family protein	0.927785	1.90235	9.00478	513.7	12.9706	2.83351e-07	1.80538e-05
257083_s_at	12183	AT3G20600;AT3G20590	[AT3G20600, NDR1 (NON RACE-SPECIFIC DISEASE RESISTANCE 1); signal transducer];[AT3G20590, non-race specific disease resistance protein, putative]	0.9272	1.90158	5.2961	39.2904	11.0169	1.19087e-06	5.3054e-05
264654_s_at	19754	AT1G08890;AT1G08900	[AT1G08890, sugar transporter family protein];[AT1G08900, carbohydrate transporter]	0.926873	1.90115	6.61043	97.71	13.3739	2.15878e-07	1.50127e-05
267550_at	22650	AT2G32800	AP4.3A; ATP binding / protein kinase	0.925332	1.89912	7.76008	216.779	6.87336	6.14961e-05	0.000945233
262399_at	17499	AT1G49500	similar to unknown protein [Arabidopsis thaliana] (TAIR:AT3G19030.1)	0.924939	1.8986	10.8806	1885.3	10.9479	1.25786e-06	5.46508e-05
267250_at	22350	AT2G23060	GCN5-related N-acetyltransferase (GNAT) family protein	0.92446	1.89797	8.25668	305.85	7.94751	1.90414e-05	0.000388493
264836_at	19936	AT1G03610	similar to unknown protein [Arabidopsis thaliana] (TAIR:AT4G03420.1); similar to Os10g0494000 [Oryza sativa (japonica cultivar-group)] (GB:NP_001064942.1); similar to hypothetical protein [Oryza sativa (japonica cultivar-group)] (GB:AAP46235.1); contains InterPro domain Protein of unknown function DUF789; (InterPro:IPR008507)	0.922985	1.89603	9.34969	652.434	14.1746	1.28532e-07	1.06124e-05
266782_at	21882	AT2G29120	ATGLR2.7 (Arabidopsis thaliana glutamate receptor 2.7)	0.922699	1.89566	5.18192	36.3006	11.5814	7.69533e-07	3.79936e-05
262638_at	17738	AT1G06650	2-oxoglutarate-dependent dioxygenase, putative	0.921903	1.89461	8.63492	397.529	14.9636	7.91112e-08	7.74474e-06
249941_at	5041	AT5G22270	similar to unknown protein [Arabidopsis thaliana] (TAIR:AT3G11600.1); similar to H0913C04.5 [Oryza sativa (indica cultivar-group)] (GB:CAJ86164.1); similar to Os04g0415000 [Oryza sativa (japonica cultivar-group)] (GB:NP_001052757.1); similar to Os02g0536500 [Oryza sativa (japonica cultivar-group)] (GB:NP_001047044.1)	0.918513	1.89017	9.11249	553.52	11.6487	7.31454e-07	3.6429e-05
254266_at	9366	AT4G23130	CRK5 (CYSTEINE-RICH RLK5); kinase	0.918482	1.89013	5.34996	40.7848	8.57246	1.01646e-05	0.000243802
266072_at	21172	AT2G18700	ATTPS11 (Arabidopsis thaliana trehalose phosphatase/synthase 11); transferase, transferring glycosyl groups	0.917825	1.88927	10.6853	1646.67	9.77284	3.35259e-06	0.000110991
250670_at	5770	AT5G06865;AT5G06860	[AT5G06860, PGIP1 (POLYGALACTURONASE INHIBITING PROTEIN 1); protein binding]	0.916267	1.88723	8.28514	311.943	9.11535	6.06475e-06	0.000170366
252862_at	7962	AT4G39830	L-ascorbate oxidase, putative	0.91498	1.88554	5.57953	47.8195	7.62525	2.67175e-05	0.000507009
261618_at	16718	AT1G33110	MATE efflux family protein	0.912077	1.88175	7.78126	219.985	13.3239	2.23187e-07	1.53803e-05
248558_at	3658	AT5G49990	xanthine/uracil permease family protein	0.911649	1.88119	8.49076	359.727	10.1446	2.43317e-06	8.92063e-05
264021_at	19121	AT2G21200	SAUR-like auxin-responsive protein	0.911607	1.88114	6.64423	100.026	12.5164	3.88515e-07	2.31385e-05
265189_at	20289	AT1G23840	similar to unknown protein [Arabidopsis thaliana] (TAIR:AT1G23830.1)	0.911134	1.88052	5.38727	41.8533	10.2198	2.28312e-06	8.49557e-05
245642_at	742	AT1G25275	thionin-like protein	0.910599	1.87983	11.3921	2687.52	14.8488	8.47748e-08	8.13537e-06
245306_at	406	AT4G14690	ELIP2 (EARLY LIGHT-INDUCIBLE PROTEIN 2); chlorophyll binding	0.909809	1.8788	8.75066	430.737	10.6556	1.59118e-06	6.57539e-05
260362_at	15462	AT1G70530	cysteine-rich receptor-like protein kinase	0.90645	1.87443	9.09731	547.727	14.4596	1.0756e-07	9.4728e-06
262607_at	17707	AT1G13990	similar to Os03g0168200 [Oryza sativa (japonica cultivar-group)] (GB:NP_001049088.1)	0.904488	1.87188	8.93178	488.352	12.2288	4.7705e-07	2.64757e-05
258880_at	13980	AT3G06420	ATG8H (AUTOPHAGY 8H); microtubule binding	0.903303	1.87034	7.96614	250.062	10.9225	1.28349e-06	5.53431e-05
256799_at	11899	AT3G18560	similar to unknown protein [Arabidopsis thaliana] (TAIR:AT1G49000.1); similar to Os02g0711400 [Oryza sativa (japonica cultivar-group)] (GB:NP_001047903.1); similar to hypothetical protein [Oryza sativa (japonica cultivar-group)] (GB:BAD45365.1)	0.901967	1.86861	7.93191	244.198	10.1652	2.39096e-06	8.81692e-05
245082_at	182	AT2G23270	similar to unknown protein [Arabidopsis thaliana] (TAIR:AT4G37290.1)	0.901037	1.86741	6.02572	65.1514	5.69945	0.000258887	0.00282411
261070_at	16170	AT1G07390	RLP1 (RECEPTOR-LIKE PROTEIN1); leucine-rich repeat family protein / protein kinase family protein	0.900284	1.86643	6.96367	124.817	9.59792	3.91228e-06	0.00012516
267381_at	22481	AT2G26190	calmodulin-binding family protein	0.898785	1.8645	8.28699	312.343	12.0596	5.39372e-07	2.90853e-05
248169_at	3269	AT5G54610	ANK (ANKYRIN); protein binding	0.897818	1.86325	4.58899	24.0671	8.439	1.15868e-05	0.000267777
255893_at	10993	AT1G17960	threonyl-tRNA synthetase, putative / threonine--tRNA ligase, putative	0.893077	1.85713	6.78255	110.091	7.38482	3.46429e-05	0.000615425
251739_at	6839	AT3G56170	CAN (CA-2+ DEPENDENT NUCLEASE); nuclease	0.891454	1.85504	9.12327	557.67	13.3079	2.25582e-07	1.5452e-05
261221_at	16321	AT1G19960	similar to transmembrane receptor [Arabidopsis thaliana] (TAIR:AT2G32140.1)	0.890977	1.85443	7.19691	146.719	6.79137	6.76111e-05	0.00101528
265680_at	20780	AT2G32150	haloacid dehalogenase-like hydrolase family protein	0.8897	1.85279	11.0902	2180.07	10.3612	2.02785e-06	7.78709e-05
261135_at	16235	AT1G19610	LCR78/PDF1.4 (Low-molecular-weight cysteine-rich 78)	0.888657	1.85145	5.16475	35.8712	6.71924	7.35408e-05	0.00107806
267246_at	22346	AT2G30250	WRKY25 (WRKY DNA-binding protein 25); transcription factor	0.88813	1.85078	5.49332	45.0459	12.9501	2.8737e-07	1.82588e-05
265648_at	20748	AT2G27500	glycosyl hydrolase family 17 protein	0.88792	1.85051	8.15003	284.056	10.57	1.70647e-06	6.91819e-05
264751_at	19851	AT1G23020	ATFRO3/FRO3 (FERRIC REDUCTION OXIDASE 3); ferric-chelate reductase	0.887638	1.85014	7.20068	147.103	6.68963	7.61365e-05	0.00110475
247035_at	2135	AT5G67110	ALC (ALCATRAZ); DNA binding / transcription factor	0.887413	1.84986	9.96407	998.816	13.157	2.49646e-07	1.66504e-05
264339_at	19439	AT1G70290	ATTPS8 (Arabidopsis thaliana trehalose phosphatase/synthase 8); transferase, transferring glycosyl groups	0.887207	1.84959	9.88111	942.996	14.0476	1.39296e-07	1.10879e-05
253814_at	8914	AT4G28290	unknown protein	0.88701	1.84934	7.7081	209.107	13.1308	2.54112e-07	1.68988e-05
252136_at	7236	AT3G50770	calmodulin-related protein, putative	0.88662	1.84884	5.22127	37.3043	5.92922	0.00019267	0.00225954
252417_at	7517	AT3G47480	calcium-binding EF hand family protein	0.883387	1.8447	4.64526	25.0244	8.14774	1.55091e-05	0.000334457
249264_s_at	4364	AT5G41750;AT5G41740	[AT5G41750, disease resistance protein (TIR-NBS-LRR class), putative];[AT5G41740, disease resistance protein (TIR-NBS-LRR class), putative]	0.881809	1.84268	5.9634	62.3967	9.30332	5.10139e-06	0.000151514
248193_at	3293	AT5G54080	HGO (HOMOGENTISATE 1,2-DIOXYGENASE); homogentisate 1,2-dioxygenase	0.880936	1.84157	10.2147	1188.31	13.2599	2.32947e-07	1.57691e-05
248801_at	3901	AT5G47370	HAT2; transcription factor	0.880934	1.84157	9.08255	542.152	11.3739	9.01499e-07	4.31094e-05
260662_at	15762	AT1G19540	isoflavone reductase, putative	0.88089	1.84151	6.80617	111.908	5.78367	0.000232125	0.0026057
249112_at	4212	AT5G43780	APS4	0.880491	1.841	7.77825	219.526	9.70543	3.55714e-06	0.000116078
254271_at	9371	AT4G23150	CRK7;cysteine-rich protein kinase family protein	0.879615	1.83988	4.86181	29.0771	8.13065	1.57808e-05	0.000338308
253317_at	8417	AT4G33960	similar to unknown protein [Arabidopsis thaliana] (TAIR:AT2G15830.1)	0.878993	1.83909	7.60551	194.754	10.8786	1.32927e-06	5.68866e-05
256096_at	11196	AT1G13650	similar to 18S pre-ribosomal assembly protein gar2-related [Arabidopsis thaliana] (TAIR:AT2G03810.3); similar to hypothetical protein [Trypanosoma cruzi strain CL Brener] (GB:XP_813437.1)	0.877633	1.83736	7.8457	230.033	9.31583	5.04353e-06	0.00015078
265872_at	20972	AT2G01670	ATNUDT17 (Arabidopsis thaliana Nudix hydrolase homolog 17); hydrolase	0.87563	1.83481	9.77593	876.696	13.7461	1.69056e-07	1.26019e-05
254318_at	9418	AT4G22530	embryo-abundant protein-related	0.873276	1.83182	7.59541	193.395	13.1234	2.55389e-07	1.69344e-05
254200_at	9300	AT4G24110	similar to Hypothetical protein [Oryza sativa (japonica cultivar-group)] (GB:AAO17020.1)	0.87122	1.82921	5.7958	55.5534	7.94222	1.9146e-05	0.000389928
261023_at	16123	AT1G12200	flavin-containing monooxygenase family protein / FMO family protein	0.870208	1.82793	8.43704	346.58	13.469	2.02693e-07	1.44935e-05
260427_at	15527	AT1G72430	auxin-responsive protein-related	0.869914	1.82755	8.08371	271.293	7.90382	1.99238e-05	0.000401113
265471_at	20571	AT2G37130	peroxidase 21 (PER21) (P21) (PRXR5)	0.868963	1.82635	5.37612	41.5312	11.9529	5.8322e-07	3.04895e-05
265698_at	20798	AT2G32160	similar to unknown protein [Arabidopsis thaliana] (TAIR:AT2G32170.1); similar to Os05g0511300 [Oryza sativa (japonica cultivar-group)] (GB:NP_001056014.1); similar to unnamed protein product [Tetraodon nigroviridis] (GB:CAF92601.1); contains InterPro domain N2227-like; (InterPro:IPR012901)	0.867776	1.82485	7.29499	157.041	10.1981	2.32531e-06	8.63849e-05
245885_at	985	AT5G09440	phosphate-responsive protein, putative	0.867418	1.82439	11.8959	3810.76	11.0472	1.16276e-06	5.20048e-05
263184_at	18284	AT1G05560	UGT1 (UDP-glucosyl transferase 75B1); UDP-glycosyltransferase/ transferase, transferring glycosyl groups	0.863216	1.81909	8.24052	302.444	8.9319	7.20048e-06	0.000193227
261901_at	17001	AT1G80920	J8; heat shock protein binding / unfolded protein binding	0.863094	1.81894	12.3975	5395.38	13.9082	1.52267e-07	1.18136e-05
248756_at	3856	AT5G47560	ATSDAT/ATTDT (TONOPLAST DICARBOXYLATE TRANSPORTER); malate transporter/ sodium:dicarboxylate symporter	0.860796	1.81604	9.33757	646.975	10.0941	2.53989e-06	9.15242e-05
252060_at	7160	AT3G52430	PAD4 (PHYTOALEXIN DEFICIENT 4); triacylglycerol lipase	0.860726	1.81595	5.17007	36.0035	6.98718	5.39832e-05	0.000856298
247585_at	2685	AT5G60680	similar to unknown protein [Arabidopsis thaliana] (TAIR:AT3G45210.1); similar to Protein of unknown function DUF584 [Medicago truncatula] (GB:ABE80969.1); contains InterPro domain Protein of unknown function DUF584; (InterPro:IPR007608)	0.858042	1.81258	10.6884	1650.19	11.8072	6.49633e-07	3.27835e-05
265075_at	20175	AT1G55450	embryo-abundant protein-related	0.851088	1.80386	7.42468	171.811	12.2872	4.57415e-07	2.58258e-05
266719_at	21819	AT2G46830	CCA1 (CIRCADIAN CLOCK ASSOCIATED 1); transcription factor	0.849777	1.80222	8.64494	400.299	13.5736	1.892e-07	1.36141e-05
260496_at	15596	AT2G41700	ATPase, coupled to transmembrane movement of substances / amino acid permease	0.849594	1.80199	8.47553	355.951	10.2801	2.17015e-06	8.15506e-05
262456_at	17556	AT1G11260	STP1 (SUGAR TRANSPORTER 1); carbohydrate transporter/ sugar porter	0.8485	1.80063	12.277	4963.04	9.79466	3.28919e-06	0.000110171
258647_at	13747	AT3G07870	F-box family protein	0.845427	1.7968	6.92954	121.899	10.7416	1.48402e-06	6.28023e-05
245734_at	834	AT1G73480	hydrolase, alpha/beta fold family protein	0.842799	1.79353	7.86546	233.206	11.0601	1.15095e-06	5.1578e-05
264708_at	19808	AT1G09740	ethylene-responsive protein, putative	0.841398	1.79179	5.65002	50.2139	10.7267	1.50197e-06	6.31012e-05
246396_at	1496	AT1G58180	carbonic anhydrase family protein / carbonate dehydratase family protein	0.841259	1.79161	9.53974	744.299	13.5965	1.86371e-07	1.34991e-05
266992_at	22092	AT2G39200	MLO12 (MILDEW RESISTANCE LOCUS O 12); calmodulin binding	0.839362	1.78926	5.07824	33.7834	5.32072	0.000428032	0.00409883
259856_at	14956	AT1G68440	similar to unknown protein [Arabidopsis thaliana] (TAIR:AT1G25400.1); similar to IMP dehydrogenase/GMP reductase [Medicago truncatula] (GB:ABE93249.1)	0.837869	1.78741	10.0745	1078.26	12.449	4.07514e-07	2.37734e-05
258472_at	13572	AT3G06080	similar to unknown protein [Arabidopsis thaliana] (TAIR:AT5G19160.1); similar to expressed protein [Oryza sativa (japonica cultivar-group)] (GB:ABA91480.2); contains InterPro domain Protein of unknown function DUF231, plant; (InterPro:IPR004253)	0.835964	1.78505	8.95582	496.559	8.18937	1.48688e-05	0.000325699
245756_at	856	AT1G35190	oxidoreductase, 2OG-Fe(II) oxygenase family protein	0.834156	1.78281	7.37362	165.837	10.4641	1.86188e-06	7.36038e-05
254691_at	9791	AT4G17840	similar to unknown protein [Arabidopsis thaliana] (TAIR:AT2G35260.1); similar to hypothetical protein 23.t00040 [Brassica oleracea] (GB:ABD65626.1); similar to hypothetical protein 40.t00061 [Brassica oleracea] (GB:ABD65174.1)	0.832129	1.78031	9.74748	859.575	11.8142	6.46237e-07	3.26844e-05
254001_at	9101	AT4G26260	MIOX4 (MYO-INOSITOL OXYGENASE 4)	0.830899	1.77879	8.85095	461.744	11.8716	6.19317e-07	3.17789e-05
262926_s_at	18026	AT1G65800;AT1G65790	[AT1G65800, ARK2 (Arabidopsis Receptor Kinase 2); kinase];[AT1G65790, ARK1 (A. THALIANA RECEPTOR KINASE I); kinase]	0.829253	1.77676	5.834	57.0438	10.6278	1.62773e-06	6.67779e-05
251356_at	6456	AT3G61060	ATPP2-A13	0.828798	1.77621	8.81732	451.106	11.7031	7.02141e-07	3.51225e-05
253643_at	8743	AT4G29780	similar to unknown protein [Arabidopsis thaliana] (TAIR:AT5G12010.1); similar to Os01g0582600 [Oryza sativa (japonica cultivar-group)] (GB:NP_001043414.1); similar to Os05g0593000 [Oryza sativa (japonica cultivar-group)] (GB:NP_001056499.1); similar to unknown protein [Oryza sativa (japonica cultivar-group)] (GB:BAD72250.1)	0.82742	1.77451	7.27998	155.415	8.07386	1.67213e-05	0.000353816
263598_at	18698	AT2G01850	EXGT-A3 (endo-xyloglucan transferase A3); hydrolase, acting on glycosyl bonds	0.826924	1.7739	10.3685	1322	13.2553	2.33667e-07	1.57691e-05
264507_at	19607	AT1G09415	NIMIN-3 (NIM1-INTERACTING 3)	0.826731	1.77366	8.10461	275.252	12.1417	5.08079e-07	2.77256e-05
255285_at	10385	AT4G04630	similar to unknown protein [Arabidopsis thaliana] (TAIR:AT4G21970.1); similar to Protein of unknown function, DUF584 [Medicago truncatula] (GB:ABE91657.1); contains InterPro domain Protein of unknown function DUF584; (InterPro:IPR007608)	0.822825	1.76887	8.44975	349.646	10.7517	1.4719e-06	6.25216e-05
245051_at	151	AT2G23320	WRKY15 (WRKY DNA-binding protein 15); transcription factor	0.822638	1.76864	8.54477	373.451	8.45984	1.13511e-05	0.000263664
252320_at	7420	AT3G48580	xyloglucan:xyloglucosyl transferase, putative / xyloglucan endotransglycosylase, putative / endo-xyloglucan transferase, putative	0.822577	1.76856	7.48587	179.255	6.7062	7.46715e-05	0.00109113
261942_at	17042	AT1G22590	AGL87; MADS domain transcription factor family protein	0.821904	1.76774	7.62661	197.624	12.0636	5.37775e-07	2.90853e-05
255602_at	10702	AT4G01026	similar to unknown protein [Arabidopsis thaliana] (TAIR:AT1G01360.1); similar to AT-rich element binding factor 3 [Pisum sativum] (GB:AAV85853.1); similar to CAPIP1-like [Solanum tuberosum] (GB:ABB29920.1); contains domain Bet v1-like (SSF55961); contains domain no description (G3D.3.30.530.20)	0.821522	1.76727	9.44395	696.483	12.3409	4.40153e-07	2.51626e-05
247543_at	2643	AT5G61600	ERF104; ethylene-responsive transcription factor family	0.820643	1.76619	7.76602	217.673	10.4154	1.93845e-06	7.55829e-05
245439_at	539	AT4G16670	similar to unknown protein [Arabidopsis thaliana] (TAIR:AT4G17350.1); similar to hypothetical protein 31.t00035 [Brassica oleracea] (GB:ABD65121.1); contains InterPro domain Pleckstrin-like, plant; (InterPro:IPR013666); contains InterPro domain Protein of unknown function DUF828, plant; (InterPro:IPR008546)	0.819972	1.76537	6.82468	113.353	9.58795	3.94713e-06	0.000125922
260272_at	15372	AT1G80570	F-box family protein (FBL14)	0.819686	1.76502	5.86788	58.3993	5.59356	0.000297367	0.00312933
245360_at	460	AT4G16330	oxidoreductase, 2OG-Fe(II) oxygenase family protein	0.819121	1.76433	9.45022	699.518	13.7505	1.68571e-07	1.26019e-05
249029_at	4129	AT5G44870	disease resistance protein (TIR-NBS-LRR class), putative	0.816932	1.76166	7.336	161.568	11.5135	8.10247e-07	3.98313e-05
258537_at	13637	AT3G04210	disease resistance protein (TIR-NBS class), putative	0.816897	1.76161	5.30488	39.5302	10.6214	1.63617e-06	6.70035e-05
249140_at	4240	AT5G43190	F-box family protein (FBX6)	0.815062	1.75937	8.3073	316.772	8.88949	7.49505e-06	0.000197931
255575_at	10675	AT4G01430	nodulin MtN21 family protein	0.812995	1.75686	9.09566	547.098	8.77568	8.35274e-06	0.000211745
251443_at	6543	AT3G59940	kelch repeat-containing F-box family protein	0.811205	1.75468	10.6438	1599.94	12.5068	3.91181e-07	2.31815e-05
250665_at	5765	AT5G06980	similar to unknown protein [Arabidopsis thaliana] (TAIR:AT3G12320.1)	0.80801	1.7508	8.36986	330.81	10.3757	2.00353e-06	7.73274e-05
256244_at	11344	AT3G12520	SULTR4;2 (sulfate transporter 4;2); sulfate transporter	0.806281	1.7487	7.60683	194.933	7.42365	3.32054e-05	0.000597802
262134_at	17234	AT1G77990	AST56 (sulphate transporter 2;2); sulfate transporter	0.80606	1.74843	7.86017	232.352	8.55194	1.03703e-05	0.000247363
258262_at	13362	AT3G15770	similar to unknown protein [Arabidopsis thaliana] (TAIR:AT5G25360.1); similar to hypothetical protein [Glycine max] (GB:AAN03467.1)	0.804004	1.74594	7.10107	137.289	6.91635	5.85324e-05	0.000910725
262408_at	17508	AT1G34750	protein phosphatase 2C, putative / PP2C, putative	0.80397	1.7459	7.08831	136.08	8.53939	1.04982e-05	0.000249183
264746_at	19846	AT1G62300	WRKY6 (WRKY DNA-binding protein 6); transcription factor	0.803017	1.74475	6.00505	64.2245	6.65682	7.91296e-05	0.0011359
256891_at	11991	AT3G19030	similar to unknown protein [Arabidopsis thaliana] (TAIR:AT1G49500.1)	0.801863	1.74335	8.85673	463.599	9.22127	5.49955e-06	0.000160006
256894_at	11994	AT3G21870	CYCP2;1 (cyclin p2;1); cyclin-dependent protein kinase	0.801697	1.74315	9.02354	520.423	12.8147	3.15421e-07	1.9498e-05
267238_at	22338	AT2G44130;AT2G44140	[AT2G44130, kelch repeat-containing F-box family protein];[AT2G44140, autophagy 4a (APG4a)]	0.800408	1.74159	11.2014	2354.74	10.9686	1.23732e-06	5.41959e-05
254057_at	9157	AT4G25170	similar to unknown protein [Arabidopsis thaliana] (TAIR:AT5G61490.1); similar to putative protein [Oryza sativa] (GB:CAC39077.1); similar to Os02g0657700 [Oryza sativa (japonica cultivar-group)] (GB:NP_001047631.1)	0.799436	1.74042	9.31521	637.028	12.0444	5.4539e-07	2.92714e-05
248821_at	3921	AT5G47070	protein kinase, putative	0.799322	1.74028	7.98819	253.912	11.3357	9.28459e-07	4.43058e-05
254016_at	9116	AT4G26150	CGA1; GATA transcription factor family protein	0.799269	1.74022	6.16892	71.9499	8.63386	9.57548e-06	0.000233851
247199_at	2299	AT5G65210	TGA1; bZIP family transcription factor protein	0.798492	1.73928	6.44248	86.972	7.34144	3.63295e-05	0.000636464
267293_at	22393	AT2G23810	TET8 (TETRASPANIN8)	0.797191	1.73771	10.6566	1614.16	12.5789	3.71776e-07	2.24344e-05
251722_at	6822	AT3G56200	amino acid transporter family protein	0.796387	1.73675	7.64592	200.286	9.52625	4.17058e-06	0.000131034
258323_at	13423	AT3G22750	protein kinase, putative	0.795887	1.73614	7.92052	242.278	11.0193	1.18858e-06	5.3054e-05
259751_at	14851	AT1G71030	MYBL2 (Arabidopsis myb-like 2); DNA binding / transcription factor	0.795165	1.73528	9.67099	815.189	11.5353	7.96904e-07	3.926e-05
262314_at	17414	AT1G70810	C2 domain-containing protein	0.795054	1.73514	6.57266	95.1846	9.78908	3.30528e-06	0.000110548
265460_at	20560	AT2G46600	calcium-binding protein, putative	0.794353	1.7343	10.1552	1140.27	10.1371	2.44865e-06	8.92233e-05
265481_at	20581	AT2G15960	unknown protein	0.792889	1.73254	9.61853	786.076	7.68757	2.50027e-05	0.000480465
246195_at	1295	AT4G36410	UBC17 (UBIQUITIN-CONJUGATING ENZYME 17); ubiquitin-protein ligase	0.790701	1.72992	7.43416	172.944	7.92722	1.94458e-05	0.000394274
257860_at	12960	AT3G13062	similar to unknown protein [Arabidopsis thaliana] (TAIR:AT1G55960.1); similar to Lipid-binding START [Medicago truncatula] (GB:ABE91086.1); contains InterPro domain Lipid-binding START; (InterPro:IPR002913)	0.790461	1.72963	8.85659	463.553	13.5923	1.86892e-07	1.34991e-05
250054_at	5154	AT5G17860	cation exchanger, putative (CAX7)	0.789522	1.7285	8.00306	256.543	10.0789	2.57313e-06	9.24302e-05
264102_at	19202	AT1G79270	ECT8 (evolutionarily conserved C-terminal region 8)	0.78904	1.72792	7.55089	187.518	5.38443	0.000392766	0.00383355
263231_at	18331	AT1G05680	UDP-glucoronosyl/UDP-glucosyl transferase family protein	0.787646	1.72626	8.90582	479.645	9.94367	2.88978e-06	0.00010075
265194_at	20294	AT1G05010	EFE (ethylene forming enzyme)	0.786779	1.72522	9.40876	679.705	10.3434	2.05825e-06	7.8641e-05
261243_at	16343	AT1G20180	similar to unknown protein [Arabidopsis thaliana] (TAIR:AT3G49070.1); similar to Protein of unknown function DUF677 [Medicago truncatula] (GB:ABE88938.1); contains InterPro domain Protein of unknown function DUF677; (InterPro:IPR007749)	0.786555	1.72495	5.02757	32.6173	9.87097	3.07757e-06	0.000104932
256965_at	12065	AT3G13450	DIN4 (DARK INDUCIBLE 4); 3-methyl-2-oxobutanoate dehydrogenase (2-methylpropanoyl-transferring)	0.786508	1.72489	10.7567	1730.16	11.303	9.52205e-07	4.50618e-05
253052_at	8152	AT4G37310	CYP81H1 (cytochrome P450, family 81, subfamily H, polypeptide 1); oxygen binding	0.785426	1.7236	8.23669	301.642	8.28576	1.34943e-05	0.000300885
254919_at	10019	AT4G11360	RHA1B (RING-H2 finger A1B); protein binding / zinc ion binding	0.784949	1.72303	9.76341	869.119	11.2542	9.88887e-07	4.59631e-05
245330_at	430	AT4G14930	acid phosphatase survival protein SurE, putative	0.784924	1.723	9.91065	962.502	12.5279	3.85382e-07	2.30723e-05
247882_at	2982	AT5G57785	contains InterPro domain Helix-loop-helix DNA-binding; (InterPro:IPR011598)	0.784374	1.72234	9.64839	802.516	13.0824	2.62572e-07	1.72228e-05
262986_at	18086	AT1G23390	kelch repeat-containing F-box family protein	0.783539	1.72135	11.0205	2077.35	12.2673	4.6401e-07	2.61139e-05
246858_at	1958	AT5G25930	leucine-rich repeat family protein / protein kinase family protein	0.782782	1.72045	6.12607	69.8444	8.1484	1.54989e-05	0.000334457
248494_at	3594	AT5G50770	short-chain dehydrogenase/reductase (SDR) family protein	0.782626	1.72026	5.88528	59.108	8.39105	1.21499e-05	0.000276618
248870_at	3970	AT5G46710	zinc-binding family protein	0.782371	1.71996	8.44652	348.863	8.91535	7.31388e-06	0.00019558
250007_at	5107	AT5G18670	BMY3 (beta-amylase 3); beta-amylase	0.781696	1.71915	12.3399	5184.07	10.4568	1.87317e-06	7.37946e-05
256772_at	11872	AT3G13750	BGAL1 (BETA GALACTOSIDASE 1); beta-galactosidase	0.781441	1.71885	12.242	4844.02	11.2045	1.02783e-06	4.72351e-05
248330_at	3430	AT5G52810	ornithine cyclodeaminase/mu-crystallin family protein	0.780832	1.71812	7.07868	135.175	9.28112	5.20593e-06	0.000153818
261648_at	16748	AT1G27730	STZ (SALT TOLERANCE ZINC FINGER); nucleic acid binding / transcription factor/ zinc ion binding	0.780014	1.71715	6.2041	73.7257	7.72841	2.39444e-05	0.000463251
262049_at	17149	AT1G80180	similar to unknown protein [Arabidopsis thaliana] (TAIR:AT1G15400.3); similar to Os06g0601100 [Oryza sativa (japonica cultivar-group)] (GB:NP_001058003.1); similar to Os01g0174100 [Oryza sativa (japonica cultivar-group)] (GB:NP_001042161.1)	0.778661	1.71554	8.95061	494.768	9.71918	3.51433e-06	0.000114845
254784_at	9884	AT4G12720	AtNUDT7 (ARABIDOPSIS THALIANA NUDIX HYDROLASE HOMOLOG 7); hydrolase	0.778215	1.71501	10.2549	1221.9	12.5215	3.87121e-07	2.31158e-05
245901_at	1001	AT5G11060	KNAT4 (KNOTTED1-LIKE HOMEOBOX GENE 4); transcription factor	0.777693	1.71439	9.37754	665.154	12.4072	4.19794e-07	2.43651e-05
250360_at	5460	AT5G11360	ATP binding / protein kinase	0.777495	1.71415	6.51744	91.6105	8.00191	1.80019e-05	0.000373014
264504_at	19604	AT1G09430	ACLA-3 (ATP-citrate lyase A-3)	0.775902	1.71226	10.3425	1298.38	10.2978	2.13821e-06	8.0483e-05
253545_at	8645	AT4G31310	avirulence-responsive protein-related / avirulence induced gene (AIG) protein-related	0.775764	1.7121	9.22275	597.48	9.53563	4.13575e-06	0.000130479
264375_at	19475	AT2G25090	CIPK16 (CIPK16); kinase	0.774358	1.71043	5.44121	43.4478	10.2774	2.17513e-06	8.16033e-05
265414_at	20514	AT2G16660	nodulin family protein	0.773697	1.70965	10.1084	1103.87	12.1421	5.07926e-07	2.77256e-05
252346_at	7446	AT3G48650	transposable element gene	0.772818	1.7086	4.94692	30.844	6.84226	6.37413e-05	0.000969293
250024_at	5124	AT5G18270	ANAC087; NAC domain transcription factor	0.771347	1.70686	5.62742	49.4334	8.40738	1.19548e-05	0.000273784
252057_at	7157	AT3G52480	similar to unknown protein [Arabidopsis thaliana] (TAIR:AT3G11640.1)	0.771099	1.70657	8.91616	483.096	7.82847	2.15526e-05	0.000426378
248789_at	3889	AT5G47440	similar to unknown protein [Arabidopsis thaliana] (TAIR:AT4G17350.1); similar to hypothetical protein 25.t00033 [Brassica oleracea] (GB:ABD64982.1); contains InterPro domain Pleckstrin-like, plant; (InterPro:IPR013666); contains InterPro domain Pleckstrin-like; (InterPro:IPR001849); contains InterPro domain Protein of unknown function DUF828, plant; (InterPro:IPR008546)	0.76976	1.70499	5.91383	60.2891	8.01773	1.77114e-05	0.000368947
260904_at	16004	AT1G02450	NIMIN-1/NIMIN1; protein binding	0.767055	1.70179	6.93018	121.953	8.7275	8.74783e-06	0.000220241
254247_at	9347	AT4G23260	protein kinase family protein	0.766979	1.7017	5.06861	33.5585	7.67032	2.54649e-05	0.000488523
266743_at	21843	AT2G02990	RNS1 (RIBONUCLEASE 1); endoribonuclease	0.764748	1.69907	8.10367	275.073	10.1658	2.38976e-06	8.81692e-05
262092_at	17192	AT1G56150	auxin-responsive family protein	0.763456	1.69755	8.38785	334.961	9.37987	4.75832e-06	0.000144524
252076_at	7176	AT3G51660	macrophage migration inhibitory factor family protein / MIF family protein	0.762479	1.6964	5.10885	34.5079	11.628	7.42933e-07	3.69201e-05
262001_at	17101	AT1G33790	jacalin lectin family protein	0.760587	1.69418	7.19324	146.346	6.6234	8.23105e-05	0.00117197
259511_at	14611	AT1G12520	CCS1 (copper chaperone for superoxide dismutase 1); superoxide dismutase copper chaperone	0.760541	1.69413	10.0619	1068.89	8.54702	1.04203e-05	0.00024759
248006_at	3106	AT5G56250	similar to unknown protein [Arabidopsis thaliana] (TAIR:AT5G56240.1); similar to Os04g0471400 [Oryza sativa (japonica cultivar-group)] (GB:NP_001053056.1); similar to hypothetical protein MtrDRAFT_AC146329g11v1 [Medicago truncatula] (GB:ABE91348.1)	0.759676	1.69311	7.27645	155.035	12.0142	5.5756e-07	2.97148e-05
246114_at	1214	AT5G20250	DIN10 (DARK INDUCIBLE 10); hydrolase, hydrolyzing O-glycosyl compounds	0.759209	1.69256	12.5976	6198.11	9.32466	5.00311e-06	0.000150171
255734_at	10834	AT1G25550	HHO3; MYB family transcription factor	0.758983	1.6923	8.03084	261.532	5.26989	0.000458618	0.00431507
258503_at	13603	AT3G02500	similar to unknown protein [Arabidopsis thaliana] (TAIR:AT5G16030.1); similar to hypothetical protein [Cleome spinosa] (GB:ABD96956.1)	0.758886	1.69218	7.15523	142.54	9.70075	3.57185e-06	0.000116355
261335_at	16435	AT1G44800	nodulin MtN21 family protein	0.756646	1.68956	8.63406	397.294	9.45732	4.43679e-06	0.000137879
251028_at	6128	AT5G02230	haloacid dehalogenase-like hydrolase family protein	0.756432	1.68931	10.5041	1452.32	10.9051	1.30141e-06	5.59044e-05
253358_at	8458	AT4G32940	GAMMA-VPE (Vacuolar processing enzyme gamma); cysteine-type endopeptidase	0.755984	1.68878	10.7051	1669.43	10.9656	1.24026e-06	5.41959e-05
266461_at	21561	AT2G47730	ATGSTF8 (GLUTATHIONE S-TRANSFERASE 8); glutathione transferase	0.755735	1.68849	12.0177	4146.45	11.8427	6.32732e-07	3.22877e-05
256097_at	11197	AT1G13670	similar to unknown protein [Arabidopsis thaliana] (TAIR:AT1G69160.1)	0.754783	1.68738	5.37815	41.5895	9.15084	5.86855e-06	0.000166495
247754_at	2854	AT5G59080	similar to unknown protein [Arabidopsis thaliana] (TAIR:AT5G02020.1)	0.754306	1.68682	6.78335	110.152	6.85859	6.25517e-05	0.000956303
248873_at	3973	AT5G46450	disease resistance protein (TIR-NBS-LRR class), putative	0.754213	1.68671	5.95437	62.0073	10.4204	1.93044e-06	7.53996e-05
267080_at	22180	AT2G41190	amino acid transporter family protein	0.754134	1.68662	7.01687	129.506	8.15015	1.54713e-05	0.000334457
255913_at	11013	AT1G66980	protein kinase family protein / glycerophosphoryl diester phosphodiesterase family protein	0.752903	1.68518	6.86263	116.375	10.0024	2.74715e-06	9.70007e-05
263927_s_at	19027	AT2G21890;AT2G21730	[AT2G21890, mannitol dehydrogenase, putative];[AT2G21730, mannitol dehydrogenase, putative]	0.752276	1.68445	7.56758	189.7	5.7075	0.000256191	0.00280274
245035_at	135	AT2G26400	ARD/ATARD3 (ACIREDUCTONE DIOXYGENASE); acireductone dioxygenase (Fe2+-requiring)/ heteroglycan binding / metal ion binding	0.751986	1.68411	8.68928	412.794	8.16849	1.51862e-05	0.000330255
256131_at	11231	AT1G13600	bZIP58; bZIP transcription factor family protein	0.750845	1.68278	5.93068	60.9976	5.69554	0.00026021	0.00283183
248005_at	3105	AT5G56240	similar to unknown protein [Arabidopsis thaliana] (TAIR:AT5G56250.1); similar to Os04g0471400 [Oryza sativa (japonica cultivar-group)] (GB:NP_001053056.1)	0.75033	1.68218	9.25864	612.531	11.3105	9.46692e-07	4.49813e-05
246440_at	1540	AT5G17650	glycine/proline-rich protein	0.750196	1.68202	7.90588	239.831	8.98783	6.83131e-06	0.000185945
263019_at	18119	AT1G23870	ATTPS9 (Arabidopsis thaliana trehalose-phosphatase/synthase 9); transferase, transferring glycosyl groups / trehalose-phosphatase	0.749751	1.6815	8.51926	366.905	5.61192	0.000290275	0.0030739
264745_at	19845	AT1G62180	APR2 (5'ADENYLYLPHOSPHOSULFATE REDUCTASE 2)	0.748847	1.68045	10.1173	1110.74	10.2562	2.21429e-06	8.27998e-05
256596_at	11696	AT3G28540	AAA-type ATPase family protein	0.747056	1.67836	6.95947	124.454	8.2653	1.3774e-05	0.000305116
257615_at	12715	AT3G26510	octicosapeptide/Phox/Bem1p (PB1) domain-containing protein	0.746831	1.6781	11.5924	3087.89	11.9832	5.70364e-07	3.01856e-05
262899_at	17999	AT1G59870	PDR8/PEN3 (PLEIOTROPIC DRUG RESISTANCE8); ATPase, coupled to transmembrane movement of substances	0.746162	1.67732	10.4457	1394.65	9.16427	5.79617e-06	0.000165263
265276_at	20376	AT2G28400	similar to unknown protein [Arabidopsis thaliana] (TAIR:AT5G60680.1); similar to Protein of unknown function DUF584 [Medicago truncatula] (GB:ABE80969.1); contains InterPro domain Protein of unknown function DUF584; (InterPro:IPR007608)	0.743058	1.67372	8.36164	328.931	11.2736	9.74119e-07	4.56256e-05
266371_at	21471	AT2G41410	calmodulin, putative	0.742431	1.67299	11.1207	2226.66	9.74207	3.44431e-06	0.00011288
246289_at	1389	AT3G56880	VQ motif-containing protein	0.741973	1.67246	11.0892	2178.55	10.1848	2.35173e-06	8.70829e-05
263158_at	18258	AT1G54160	NF-YA5; CCAAT-binding transcription factor (CBF-B/NF-YA) family protein	0.740697	1.67098	7.36583	164.943	10.3305	2.08057e-06	7.93607e-05
249988_at	5088	AT5G18310	similar to unknown protein [Arabidopsis thaliana] (TAIR:AT5G48500.1); similar to conserved hypothetical protein [Medicago truncatula] (GB:ABE90369.1)	0.74037	1.6706	9.24941	608.625	9.56823	4.01711e-06	0.000127449
261068_at	16168	AT1G07450	tropinone reductase, putative / tropine dehydrogenase, putative	0.739627	1.66974	7.30895	158.567	10.3864	1.98571e-06	7.68998e-05
258203_at	13303	AT3G13950	similar to unknown protein [Arabidopsis thaliana] (TAIR:AT4G13266.1); similar to conserved hypothetical protein [Medicago truncatula] (GB:ABE80572.1)	0.739273	1.66933	5.18903	36.4798	7.5111	3.02011e-05	0.000559615
245420_at	520	AT4G17410	similar to unknown protein [Arabidopsis thaliana] (TAIR:AT5G47430.1); similar to hypothetical protein 31.t00039 [Brassica oleracea] (GB:ABD65123.1); similar to Zinc finger, RING-type; Zinc finger, CCHC-type [Medicago truncatula] (GB:ABE84222.1); similar to hypothetical protein 24.t00020 [Brassica oleracea] (GB:ABD64942.1); contains domain RING/U-box (SSF57850); contains domain Retrovirus zinc fin…	0.738622	1.66858	6.31284	79.4976	9.20835	5.56527e-06	0.0001609
262569_at	17669	AT1G15180	MATE efflux family protein	0.738547	1.66849	7.55866	188.531	6.95944	5.57175e-05	0.000874082
262667_at	17767	AT1G62810	copper amine oxidase, putative	0.737939	1.66779	6.67376	102.094	8.89369	7.46527e-06	0.000197555
254415_at	9515	AT4G21326	subtilase family protein	0.737645	1.66745	7.52547	184.243	5.54835	0.000315637	0.00327556
246327_at	1427	AT1G16670	protein kinase family protein	0.732752	1.66181	7.55606	188.191	7.85802	2.08969e-05	0.000417025
260973_at	16073	AT1G53490	HEI10; RING finger protein	0.732606	1.66164	5.71383	52.485	8.77544	8.35469e-06	0.000211745
257939_at	13039	AT3G19930	STP4 (SUGAR TRANSPORTER 4); carbohydrate transporter/ sugar porter	0.732534	1.66155	9.00358	513.271	11.2836	9.66592e-07	4.53662e-05
247650_at	2750	AT5G59960	similar to Os01g0151600 [Oryza sativa (japonica cultivar-group)] (GB:NP_001042041.1); similar to similar to Dictyostelium discoideum (Slime mold). MkpA protein (GB:AAL92603.1)	0.731594	1.66047	8.88665	473.312	9.77312	3.35179e-06	0.000110991
261252_at	16352	AT1G05810	ARA/Ara-1/AtRABA5e/AtRab11D (Arabidopsis Rab GTPase homolog A5e); GTP binding	0.730665	1.6594	7.50252	181.336	8.67012	9.24524e-06	0.000228229
257100_at	12200	AT3G25010	disease resistance family protein	0.729453	1.65801	4.86489	29.1391	9.15956	5.82142e-06	0.000165625
256266_at	11366	AT3G12320	similar to unknown protein [Arabidopsis thaliana] (TAIR:AT5G06980.1); similar to ACI112 [Lycopersicon esculentum] (GB:AAY97870.1)	0.729298	1.65783	7.84956	230.65	11.722	6.92265e-07	3.47045e-05
258939_at	14039	AT3G10020	similar to Os12g0147200 [Oryza sativa (japonica cultivar-group)] (GB:NP_001066153.1); similar to Os11g0149200 [Oryza sativa (japonica cultivar-group)] (GB:NP_001065754.1)	0.729249	1.65778	11.7582	3464.03	10.0216	2.70246e-06	9.58681e-05
256981_at	12081	AT3G13380	BRL3 (BRI1-LIKE 3); protein binding / protein kinase	0.728977	1.65746	6.70364	104.231	10.6693	1.57362e-06	6.52623e-05
245226_at	326	AT3G29970	germination protein-related	0.728544	1.65697	5.31052	39.6849	9.80421	3.26185e-06	0.000109577
248895_at	3995	AT5G46330	FLS2 (FLAGELLIN-SENSITIVE 2); ATP binding / kinase/ protein binding / protein serine/threonine kinase/ transmembrane receptor protein serine/threonine kinase	0.728344	1.65674	6.53249	92.5711	7.54628	2.90772e-05	0.00054195
257635_at	12735	AT3G26280	CYP71B4 (cytochrome P450, family 71, subfamily B, polypeptide 4); oxygen binding	0.728152	1.65652	4.93891	30.6732	10.6963	1.53944e-06	6.43124e-05
262656_at	17756	AT1G14200	zinc finger (C3HC4-type RING finger) family protein	0.72724	1.65547	7.82482	226.728	9.40484	4.65196e-06	0.000142431
250815_s_at	5915	AT5G05040;AT5G05060	[AT5G05040, cysteine protease inhibitor];[AT5G05060, similar to cysteine protease inhibitor [Arabidopsis thaliana] (TAIR:AT5G05040.1); contains InterPro domain Arabidopsis thaliana cystatin-related protein; (InterPro:IPR006525)]	0.726589	1.65472	9.67199	815.755	11.2664	9.79529e-07	4.56913e-05
253377_at	8477	AT4G33300	ADR1-L1 (ADR1-LIKE 1); ATP binding / protein binding	0.725962	1.654	9.42845	689.043	12.319	4.47096e-07	2.53688e-05
248263_at	3363	AT5G53370	pectinesterase family protein	0.724133	1.65191	9.01226	516.368	10.6556	1.59124e-06	6.57539e-05
266778_at	21878	AT2G29090	CYP707A2 (cytochrome P450, family 707, subfamily A, polypeptide 2); oxygen binding	0.723726	1.65144	5.47715	44.5436	8.96573	6.97461e-06	0.000188944
247524_at	2624	AT5G61440	thioredoxin family protein	0.72248	1.65002	9.57675	763.64	11.0792	1.13374e-06	5.10069e-05
257745_at	12845	AT3G29240	similar to unknown protein [Arabidopsis thaliana] (TAIR:AT1G33780.1); similar to Os10g0330400 [Oryza sativa (japonica cultivar-group)] (GB:NP_001064365.1); similar to Protein of unknown function DUF179 [Medicago truncatula] (GB:ABE94310.1); contains InterPro domain Protein of unknown function DUF179; (InterPro:IPR003774)	0.722094	1.64957	11.8462	3681.91	9.8334	3.17983e-06	0.000107581
249481_at	4581	AT5G38900	DSBA oxidoreductase family protein	0.721325	1.6487	5.38875	41.8964	6.97599	5.46757e-05	0.000862485
259793_at	14893	AT1G64380	ERF061; DREB subfamily A-6 of ERF/AP2 transcription factor family	0.720399	1.64764	7.79574	222.204	7.18207	4.33389e-05	0.00072369
264379_at	19479	AT2G25200	similar to unknown protein [Arabidopsis thaliana] (TAIR:AT5G11000.1); similar to Os08g0439600 [Oryza sativa (japonica cultivar-group)] (GB:NP_001061898.1); similar to unknown protein [Oryza sativa (japonica cultivar-group)] (GB:BAD28921.1); contains InterPro domain Protein of unknown function DUF868, plant; (InterPro:IPR008586)	0.720398	1.64764	5.93954	61.3735	6.47067	9.87281e-05	0.00134769
264022_at	19122	AT2G21185;AT2G21187	[AT2G21185, unknown protein]	0.719598	1.64672	9.27257	618.474	9.06796	6.33801e-06	0.000176952
250114_s_at	5214	AT5G16370;AT5G16340	[AT5G16370, AMP-binding protein, putative];[AT5G16340, AMP-binding protein, putative]	0.719422	1.64652	9.39521	673.346	10.2412	2.24225e-06	8.37083e-05
252570_at	7670	AT3G45300	IVD (ISOVALERYL-COA-DEHYDROGENASE)	0.719257	1.64633	8.96616	500.129	8.57781	1.01117e-05	0.000242787
246406_at	1506	AT1G57650	disease resistance protein (NBS-LRR class), putative	0.719229	1.6463	5.18981	36.4996	5.93454	0.000191373	0.00225127
264844_at	19944	AT1G03520	glycosyltransferase family 14 protein / core-2/I-branching enzyme family protein	0.719174	1.64624	8.02324	260.157	10.9669	1.23902e-06	5.41959e-05
256930_at	12030	AT3G22460	cysteine synthase, putative / O-acetylserine (thiol)-lyase, putative / O-acetylserine sulfhydrylase, putative	0.718491	1.64546	5.99714	63.8734	5.83205	0.000218119	0.00247773
266604_at	21704	AT2G46030	UBC6 (UBIQUITIN-CONJUGATING ENZYME 6); ubiquitin-protein ligase	0.717892	1.64478	9.68796	824.833	11.9874	5.68611e-07	3.01628e-05
250676_at	5776	AT5G06320	NHL3 (NDR1/HIN1-like 3)	0.717351	1.64416	10.3242	1282.03	11.8365	6.35612e-07	3.23623e-05
249736_at	4836	AT5G24460	similar to Os06g0712200 [Oryza sativa (japonica cultivar-group)] (GB:NP_001058555.1); contains domain no description (G3D.3.90.79.10); contains domain Nudix (SSF55811)	0.717124	1.6439	8.43535	346.173	9.75807	3.3963e-06	0.000112112
261410_at	16510	AT1G07610	MT1C (metallothionein 1C)	0.716207	1.64286	10.1405	1128.72	7.49852	3.06145e-05	0.000563549
250858_at	5958	AT5G04760	DIV2; MYB family transcription factor	0.714338	1.64073	8.66901	407.034	10.9442	1.26154e-06	5.47068e-05
266965_at	22065	AT2G39510	nodulin MtN21 family protein	0.710873	1.63679	9.80736	896.006	7.02779	5.155e-05	0.00082982
254040_at	9140	AT4G25900	aldose 1-epimerase family protein	0.709835	1.63562	8.88456	472.627	9.51479	4.21362e-06	0.000131957
256296_at	11396	AT1G69480	EXS family protein / ERD1/XPR1/SYG1 family protein	0.709308	1.63502	5.17489	36.124	7.5597	2.86607e-05	0.000535861
259076_at	14176	AT3G02140	TMAC2 (TWO OR MORE ABRES-CONTAINING GENE 2)	0.709073	1.63475	7.15587	142.604	7.31994	3.71981e-05	0.000647208
264777_at	19877	AT1G08630	THA1 (THREONINE ALDOLASE 1); aldehyde-lyase/ threonine aldolase	0.708711	1.63434	8.7779	438.947	9.52235	4.18516e-06	0.000131312
264300_at	19400	AT1G78670	ATGGH3 (GAMMA-GLUTAMYL HYDROLASE 3); gamma-glutamyl hydrolase	0.708137	1.63369	9.74288	856.84	10.6408	1.61056e-06	6.63118e-05
267096_at	22196	AT2G38180	GDSL-motif lipase/hydrolase family protein	0.707349	1.6328	8.25445	305.377	9.94267	2.89227e-06	0.00010075
262237_at	17337	AT1G48320	thioesterase family protein	0.70634	1.63166	8.71053	418.92	7.63636	2.64025e-05	0.000501868
254028_s_at	9128	AT4G25850;AT4G25860	[AT4G25850, oxysterol-binding family protein];[AT4G25860, oxysterol-binding family protein]	0.706087	1.63137	7.95708	248.496	11.6092	7.53541e-07	3.72847e-05
255255_at	10355	AT4G05070	similar to wound induced protein-like [Vitis vinifera] (GB:AAO12870.1)	0.706068	1.63135	9.64194	798.939	9.77424	3.34849e-06	0.000110991
263804_at	18904	AT2G40270	protein kinase family protein	0.704987	1.63013	7.96791	250.368	9.80041	3.27271e-06	0.00010978
264908_at	20008	AT2G17440	leucine-rich repeat family protein	0.70441	1.62948	7.65325	201.306	7.23403	4.09037e-05	0.000695759
266181_at	21281	AT2G02390	ATGSTZ1 (GLUTATHIONE S-TRANSFERASE 18); glutathione transferase	0.704268	1.62932	9.20244	589.129	10.499	1.8089e-06	7.18834e-05
254431_at	9531	AT4G20840	FAD-binding domain-containing protein	0.703694	1.62867	6.72318	105.653	8.59381	9.95539e-06	0.000240299
251497_at	6597	AT3G59060	PIL6 (PHYTOCHROME-INTERACTING FACTOR 5); DNA binding / transcription factor	0.703034	1.62792	7.91806	241.866	5.95023	0.000187602	0.00221605
245352_at	452	AT4G15490	UGT84A3; UDP-glycosyltransferase/ sinapate 1-glucosyltransferase/ transferase, transferring glycosyl groups	0.702599	1.62743	8.15174	284.392	9.77866	3.33556e-06	0.000110991
259364_at	14464	AT1G13260	RAV1 (Related to ABI3/VP1 1); DNA binding / transcription factor	0.701876	1.62662	6.0449	66.0233	7.3079	3.76948e-05	0.000654353
247988_at	3088	AT5G56910	cysteine protease inhibitor	0.701698	1.62642	7.9751	251.619	9.09521	6.17927e-06	0.000173156
247666_at	2766	AT5G60140	transcriptional factor B3 family protein	0.701428	1.62611	8.07752	270.131	4.50429	0.00135651	0.00979178
259996_at	15096	AT1G67910	similar to unknown protein [Arabidopsis thaliana] (TAIR:AT1G24577.1); similar to hypothetical protein [Plantago major] (GB:CAH59418.1)	0.698918	1.62329	8.47506	355.834	9.51381	4.2173e-06	0.000131957
249824_at	4924	AT5G23380	similar to unknown protein [Arabidopsis thaliana] (TAIR:AT1G03610.1); similar to hypothetical protein [Oryza sativa (japonica cultivar-group)] (GB:AAO39871.1); similar to Os01g0513400 [Oryza sativa (japonica cultivar-group)] (GB:NP_001043182.1); similar to hypothetical protein [Oryza sativa (japonica cultivar-group)] (GB:AAP46235.1); contains InterPro domain Protein of unknown function DUF789; (I…	0.69849	1.6228	7.39857	168.73	6.99763	5.33457e-05	0.000850325
258275_at	13375	AT3G15760	similar to unknown protein [Arabidopsis thaliana] (TAIR:AT1G52565.1); similar to conserved hypothetical protein [Medicago truncatula] (GB:ABD28733.1)	0.697604	1.62181	6.9845	126.632	10.0416	2.65655e-06	9.4681e-05
249688_at	4788	AT5G36160	aminotransferase-related	0.694525	1.61835	9.58245	766.663	11.1288	1.09043e-06	4.9712e-05
254832_at	9932	AT4G12490	protease inhibitor/seed storage/lipid transfer protein (LTP) family protein	0.694298	1.6181	5.26909	38.5616	4.57745	0.00121851	0.00902579
267392_at	22492	AT2G44490	PEN2 (PENETRATION 2); hydrolase, hydrolyzing O-glycosyl compounds	0.693281	1.61696	10.19	1168.17	7.3205	3.71752e-05	0.000647208
252908_at	8008	AT4G39670	similar to ACD11 (ACCELERATED CELL DEATH 11) [Arabidopsis thaliana] (TAIR:AT2G34690.1); similar to Os03g0710700 [Oryza sativa (japonica cultivar-group)] (GB:NP_001051050.1); similar to expressed protein [Oryza sativa (japonica cultivar-group)] (GB:ABF98504.1); contains domain GLYCOLIPID TRANSFER PROTEIN-RELATED (PTHR10219)	0.692955	1.61659	5.83157	56.9478	7.88254	2.03696e-05	0.000407571
264957_at	20057	AT1G77000	ATSKP2;2 (ARABIDOPSIS HOMOLOG OF HOMOLOG OF HUMAN SKP2 2); ubiquitin-protein ligase	0.692928	1.61656	9.05724	532.723	10.6288	1.62629e-06	6.67779e-05
265345_at	20445	AT2G22680	zinc finger (C3HC4-type RING finger) family protein	0.692049	1.61558	8.99617	510.643	9.86534	3.09264e-06	0.000105288
248566_s_at	3666	AT5G49740;AT5G49730	[AT5G49740, ATFRO7/FRO7 (FERRIC REDUCTION OXIDASE 7); ferric-chelate reductase/ oxidoreductase];[AT5G49730, ATFRO6/FRO6 (FERRIC REDUCTION OXIDASE 6); ferric-chelate reductase/ oxidoreductase]	0.690257	1.61357	11.7363	3411.74	7.57497	2.81945e-05	0.000529243
252563_at	7663	AT3G45970	ATEXLA1 (ARABIDOPSIS THALIANA EXPANSIN-LIKE A1)	0.689617	1.61286	10.0835	1085.01	8.01078	1.78385e-05	0.000371255
258436_at	13536	AT3G16720	ATL2 (Arabidopsis T?xicos en Levadura 2); protein binding / zinc ion binding	0.689189	1.61238	6.46179	88.1438	8.54942	1.03958e-05	0.000247363
253956_at	9056	AT4G26700	ATFIM1 (Arabidopsis thaliana fimbrin 1); actin binding	0.689077	1.61225	8.67917	409.912	10.4472	1.88804e-06	7.41243e-05
255733_at	10833	AT1G25400	similar to unknown protein [Arabidopsis thaliana] (TAIR:AT1G68440.1); similar to IMP dehydrogenase/GMP reductase [Medicago truncatula] (GB:ABE93249.1)	0.687804	1.61083	6.9136	120.56	8.98799	6.83028e-06	0.000185945
262548_at	17648	AT1G31280	AGO2 (ARGONAUTE 2)	0.687402	1.61038	7.43382	172.903	8.14551	1.55444e-05	0.000334735
267134_at	22234	AT2G23450	protein kinase family protein	0.685544	1.60831	9.25703	611.847	10.5472	1.7387e-06	7.00703e-05
250937_at	6037	AT5G03230	similar to unknown protein [Arabidopsis thaliana] (TAIR:AT5G60680.1); similar to Protein of unknown function DUF584 [Medicago truncatula] (GB:ABD32800.1); contains InterPro domain Protein of unknown function DUF584; (InterPro:IPR007608)	0.684882	1.60757	8.40121	338.078	9.84285	3.15374e-06	0.000107049
248448_at	3548	AT5G51190	ERF105; AP2 domain-containing transcription factor, putative	0.684808	1.60749	5.99756	63.8918	3.66943	0.00486595	0.0262269
255794_at	10894	AT2G33480	ANAC041 (Arabidopsis NAC domain containing protein 41); transcription factor	0.684634	1.60729	8.57831	382.234	8.35752	1.25614e-05	0.000284534
260357_at	15457	AT1G69260	similar to unknown protein [Arabidopsis thaliana] (TAIR:AT1G13740.1); similar to Os07g0602900 [Oryza sativa (japonica cultivar-group)] (GB:NP_001060209.1); similar to expressed protein [Oryza sativa (japonica cultivar-group)] (GB:ABF94628.1); similar to Os03g0419100 [Oryza sativa (japonica cultivar-group)] (GB:NP_001050378.1); contains InterPro domain Protein of unknown function DUF1675; (InterPr…	0.68343	1.60595	6.70366	104.232	10.5591	1.72173e-06	6.95093e-05
245108_at	208	AT2G41510	ATCKX1/CKX1 (CYTOKININ OXIDASE/DEHYDROGENASE 1); cytokinin dehydrogenase	0.683227	1.60573	5.66047	50.5791	6.18673	0.000139528	0.00177108
261895_at	16995	AT1G80830	NRAMP1 (NRAMP metal ion transporter 1); manganese ion transporter/ metal ion transporter	0.682952	1.60542	10.0034	1026.44	10.7525	1.47103e-06	6.25216e-05
261711_at	16811	AT1G32700	zinc-binding family protein	0.682434	1.60485	10.5611	1510.8	10.7357	1.49111e-06	6.29857e-05
246705_x_at	1805	AT5G28120;AT5G28110	[AT5G28120, similar to unknown protein [Arabidopsis thaliana] (TAIR:AT5G28110.1)];[AT5G28110, similar to unknown protein [Arabidopsis thaliana] (TAIR:AT5G28120.1)]	0.681631	1.60395	5.49724	45.1685	4.56122	0.00124777	0.00918985
258225_at	13325	AT3G15630	similar to unknown protein [Arabidopsis thaliana] (TAIR:AT1G52720.1); similar to conserved hypothetical protein [Medicago truncatula] (GB:ABE92597.1)	0.68117	1.60344	11.6214	3150.5	9.32457	5.00352e-06	0.000150171
250062_at	5162	AT5G17760	AAA-type ATPase family protein	0.679083	1.60112	8.91706	483.396	9.68535	3.6207e-06	0.000117647
262749_at	17849	AT1G28580	GDSL-motif lipase, putative	0.678309	1.60026	9.9163	966.282	10.9709	1.2351e-06	5.41959e-05
260656_at	15756	AT1G19380	similar to unknown protein [Arabidopsis thaliana] (TAIR:AT5G65650.1); similar to unknown [Vitis pseudoreticulata] (GB:ABC69762.1); contains InterPro domain Protein of unknown function DUF1195; (InterPro:IPR010608)	0.677874	1.59978	7.94636	246.657	7.39411	3.42928e-05	0.000611586
260774_at	15874	AT1G78290	serine/threonine protein kinase, putative	0.677685	1.59957	7.61205	195.639	11.0671	1.14461e-06	5.13946e-05
248698_at	3798	AT5G48380	leucine-rich repeat family protein / protein kinase family protein	0.676854	1.59865	8.97332	502.619	10.9311	1.27472e-06	5.51735e-05
247874_at	2974	AT5G57710	heat shock protein-related	0.675932	1.59763	9.91555	965.776	6.65761	7.90558e-05	0.00113556
258544_at	13644	AT3G07040	RPM1 (RESISTANCE TO P. SYRINGAE PV MACULICOLA 1)	0.674939	1.59653	6.52922	92.3617	6.0658	0.000162184	0.00198926
263988_at	19088	AT2G42830	SHP2 (SHATTERPROOF 2); MADS domain transcription factor	0.673241	1.59465	8.59274	386.077	7.75669	2.32402e-05	0.000452697
254453_at	9553	AT4G21120	AAT1 (CATIONIC AMINO ACID TRANSPORTER 1); cationic amino acid transporter	0.67281	1.59417	7.88223	235.932	7.85393	2.09865e-05	0.000417716
264561_at	19661	AT1G55810	uracil phosphoribosyltransferase, putative / UMP pyrophosphorylase, putative / UPRTase, putative	0.669193	1.59018	9.07984	541.133	9.01964	6.63063e-06	0.000183327
261692_at	16792	AT1G08450	CRT3 (CALRETICULIN 3); calcium ion binding	0.667921	1.58878	9.61697	785.23	8.82405	7.97572e-06	0.000205566
253984_at	9084	AT4G26590	ATOPT5 (oligopeptide transporter 5); oligopeptide transporter	0.665999	1.58667	7.35439	163.64	8.81669	8.0319e-06	0.000206315
251509_at	6609	AT3G59010	pectinesterase family protein	0.665859	1.58651	7.43664	173.242	9.92538	2.93581e-06	0.000101772
263986_at	19086	AT2G42790	CSY3 (CITRATE SYNTHASE 3); citrate (SI)-synthase	0.665431	1.58604	9.44734	698.124	9.03562	6.53223e-06	0.000181787
245074_at	174	AT2G23200	protein kinase family protein	0.665357	1.58596	6.44844	87.332	7.76097	2.31355e-05	0.000451044
257634_s_at	12734	AT3G26170;AT3G26180	[AT3G26170, CYP71B19 (cytochrome P450, family 71, subfamily B, polypeptide 19); oxygen binding];[AT3G26180, CYP71B20 (cytochrome P450, family 71, subfamily B, polypeptide 20); oxygen binding]	0.664294	1.58479	9.65832	808.061	8.38617	1.22089e-05	0.000277374
249862_at	4962	AT5G22920	zinc finger (C3HC4-type RING finger) family protein	0.663089	1.58347	12.5764	6107.61	9.56618	4.02446e-06	0.000127497
264663_at	19763	AT1G09970	leucine-rich repeat transmembrane protein kinase, putative	0.662559	1.58289	9.57112	760.665	8.48142	1.11124e-05	0.000260241
261526_at	16626	AT1G14370	APK2A (PROTEIN KINASE 2A); kinase	0.660422	1.58054	5.96217	62.3436	9.96061	2.84787e-06	9.99128e-05
266656_at	21756	AT2G25900	ATCTH (Arabidopsis thaliana Cys3His zinc finger protein); transcription factor	0.660318	1.58043	10.9781	2017.14	8.52442	1.06532e-05	0.000251586
258975_at	14075	AT3G01970	WRKY45 (WRKY DNA-binding protein 45); transcription factor	0.659616	1.57966	5.61305	48.9436	5.81459	0.000223065	0.00252262
253915_at	9015	AT4G27280	calcium-binding EF hand family protein	0.659123	1.57912	9.08527	543.172	8.9596	7.01498e-06	0.000189731
259312_at	14412	AT3G05200	ATL6 (Arabidopsis T?xicos en Levadura 6); protein binding / zinc ion binding	0.658879	1.57886	7.92275	242.653	8.68304	9.13057e-06	0.000227119
265260_at	20360	AT2G43000	ANAC042 (Arabidopsis NAC domain containing protein 42); transcription factor	0.658851	1.57882	4.93758	30.6451	6.69044	7.6064e-05	0.0011044
253476_at	8576	AT4G32300	lectin protein kinase family protein	0.658333	1.57826	7.62462	197.35	7.80875	2.20024e-05	0.00043265
249922_at	5022	AT5G19140	auxin/aluminum-responsive protein, putative	0.657573	1.57743	12.1818	4646.02	10.9	1.30675e-06	5.6028e-05
256977_at	12077	AT3G21040	copia-like retrotransposable element gene	0.656588	1.57635	5.70586	52.1957	6.75498	7.0535e-05	0.00104799
253281_at	8381	AT4G34138	UGT73B1 (UDP-glucosyl transferase 73B1); UDP-glycosyltransferase/ abscisic acid glucosyltransferase	0.656328	1.57607	7.99632	255.348	7.06327	4.95214e-05	0.000803054
255617_at	10717	AT4G01330	protein kinase family protein	0.656294	1.57603	9.97066	1003.39	8.77337	8.37123e-06	0.000211929
255768_at	10868	AT1G16705	p300/CBP acetyltransferase-related protein-related	0.6551	1.57473	9.11373	553.995	8.27303	1.36676e-05	0.000304154
260592_at	15692	AT1G55850	ATCSLE1 (Cellulose synthase-like E1); cellulose synthase/ transferase, transferring glycosyl groups	0.654852	1.57445	9.93813	981.017	9.11907	6.04384e-06	0.000170197
266106_at	21206	AT2G45170	AtATG8e (AUTOPHAGY 8E); microtubule binding	0.654578	1.57416	9.15293	569.254	7.57741	2.81208e-05	0.000528365
247655_at	2755	AT5G59820	RHL41 (RESPONSIVE TO HIGH LIGHT 41); zinc finger transcription factor/ zinc ion binding	0.654222	1.57377	7.96273	249.471	8.61281	9.7732e-06	0.000237915
263745_at	18845	AT2G21450	CHR34 (chromatin remodeling 34); ATP binding / DNA binding / helicase	0.653461	1.57294	5.71855	52.6569	7.91921	1.9608e-05	0.000395835
262113_at	17213	AT1G02820	late embryogenesis abundant 3 family protein / LEA3 family protein	0.652407	1.57179	6.95557	124.118	6.69148	7.59714e-05	0.00110376
249769_at	4869	AT5G24120	SIGE (RNA polymerase sigma subunit E); DNA binding / DNA-directed RNA polymerase/ sigma factor/ transcription factor	0.651994	1.57134	7.8828	236.025	9.56816	4.01735e-06	0.000127449
246304_at	1404	AT3G51840	ACX4 (ACYL-COA OXIDASE 4); oxidoreductase	0.651687	1.571	11.6609	3238.05	9.91375	2.9655e-06	0.000102335
255716_at	10816	AT4G00330	CRCK2 (calmodulin-binding receptor-like cytoplasmic kinase 2); kinase	0.65135	1.57064	7.53461	185.415	7.56164	2.86012e-05	0.000535187
248199_at	3299	AT5G54170	similar to CP5 [Arabidopsis thaliana] (TAIR:AT1G64720.1); similar to putative nodule membrane protein [Medicago sativa] (GB:AAL57201.1); contains InterPro domain Lipid-binding START; (InterPro:IPR002913)	0.651176	1.57045	9.47621	712.235	10.5318	1.76082e-06	7.07364e-05
262910_at	18010	AT1G59710	similar to unknown protein [Arabidopsis thaliana] (TAIR:AT1G27100.1); similar to Cytosolic fatty-acid binding; Actin-crosslinking proteins [Medicago truncatula] (GB:ABE82702.1); contains InterPro domain Protein of unknown function DUF569; (InterPro:IPR007679); contains InterPro domain Actin-crosslinking proteins; (InterPro:IPR008999)	0.650758	1.56999	7.10686	137.841	6.56236	8.84863e-05	0.00123723
266423_at	21523	AT2G41340	eukaryotic rpb5 RNA polymerase subunit family protein	0.650596	1.56982	7.66019	202.277	7.00653	5.28086e-05	0.000845704
250775_at	5875	AT5G05460	hydrolase, acting on glycosyl bonds	0.649789	1.56894	6.32889	80.3871	9.09574	6.17623e-06	0.000173156
263318_at	18418	AT2G24762	similar to GDU1 (GLUTAMINE DUMPER 1) [Arabidopsis thaliana] (TAIR:AT4G31730.1); similar to At5g57685 [Medicago truncatula] (GB:ABE81292.1)	0.649442	1.56856	8.12778	279.708	6.98632	5.40364e-05	0.000856547
247314_at	2414	AT5G64000	SAL2; 3'(2'),5'-bisphosphate nucleotidase/ inositol or phosphatidylinositol phosphatase	0.648563	1.56761	5.04558	33.0272	8.98864	6.82613e-06	0.000185945
249373_at	4473	AT5G40670	PQ-loop repeat family protein / transmembrane family protein	0.648557	1.5676	9.92461	971.863	9.57523	3.99212e-06	0.000127002
264652_at	19752	AT1G08920	sugar transporter, putative	0.648098	1.5671	6.65014	100.437	8.05864	1.69836e-05	0.000357376
260748_at	15848	AT1G49210	zinc finger (C3HC4-type RING finger) family protein	0.648069	1.56707	5.41112	42.551	5.10518	0.000575012	0.00509564
260820_at	15920	AT1G06840	leucine-rich repeat transmembrane protein kinase, putative	0.647369	1.56631	7.88665	236.657	7.85855	2.08855e-05	0.000417025
266860_at	21960	AT2G26870	phosphoesterase family protein	0.646895	1.56579	7.61006	195.37	8.95879	7.02031e-06	0.000189731
249835_s_at	4935	AT5G23490;AT5G23510	[AT5G23490, similar to unknown protein [Arabidopsis thaliana] (TAIR:AT5G08440.1); similar to Os05g0100900 [Oryza sativa (japonica cultivar-group)] (GB:NP_001054377.1); similar to Os01g0108000 [Oryza sativa (japonica cultivar-group)] (GB:NP_001041786.1); similar to expressed protein [Oryza sativa (japonica cultivar-group)] (GB:ABF98471.1)];[AT5G23510, similar to unknown protein [Arabidopsis thalia…	0.646745	1.56563	6.90736	120.039	6.93366	5.73832e-05	0.000896955
264614_s_at	19714	AT1G02590;AT1G04580	[AT1G02590, aldehyde oxidase, putative];[AT1G04580, AAO4 (ALDEHYDE OXIDASE 4); aldehyde oxidase]	0.646666	1.56555	7.60401	194.552	9.61717	3.84594e-06	0.000123461
252075_at	7175	AT3G51730	saposin B domain-containing protein	0.646254	1.5651	11.4233	2746.43	10.1407	2.44113e-06	8.92233e-05
245242_at	342	AT1G44446	CH1 (CHLORINA 1); chlorophyll a oxygenase	0.645988	1.56481	9.84924	922.397	10.5139	1.78693e-06	7.12583e-05
260875_at	15975	AT1G21410	F-box family protein	0.645052	1.5638	9.90454	958.439	10.0234	2.69811e-06	9.58627e-05
265184_at	20284	AT1G23710	similar to unknown protein [Arabidopsis thaliana] (TAIR:AT1G70420.1); similar to Os01g0639600 [Oryza sativa (japonica cultivar-group)] (GB:NP_001043675.1); similar to Protein of unknown function DUF1645 [Medicago truncatula] (GB:ABE93113.1); contains InterPro domain Protein of unknown function DUF1645; (InterPro:IPR012442)	0.645043	1.56379	7.4603	176.106	10.1227	2.47883e-06	8.98919e-05
251848_at	6948	AT3G54620	BZO2H4 (basic leucine zipper O2 homolog 4); transcription factor	0.64486	1.56359	9.20567	590.45	9.87921	3.05562e-06	0.000104496
259055_at	14155	AT3G03340	UNE6 (unfertilized embryo sac 6)	0.643521	1.56214	9.1407	564.451	6.84905	6.32438e-05	0.0009643
250487_at	5587	AT5G09690	magnesium transporter CorA-like family protein (MRS2-7)	0.642805	1.56136	5.82361	56.6347	6.34743	0.000114577	0.00151683
266231_at	21331	AT2G02220	ATPSKR1 (PHYTOSULFOKIN RECEPTOR 1); ATP binding / peptide receptor/ protein serine/threonine kinase	0.642782	1.56134	7.22118	149.208	8.77133	8.38766e-06	0.000211996
251336_at	6436	AT3G61190	BAP1 (BON ASSOCIATION PROTEIN 1)	0.642024	1.56052	4.96254	31.1798	7.93816	1.92267e-05	0.000391162
261821_at	16921	AT1G11530	ATCXXS1 (C-TERMINAL CYSTEINE RESIDUE IS CHANGED TO A SERINE 1); thiol-disulfide exchange intermediate	0.641846	1.56032	9.20887	591.76	8.42098	1.1795e-05	0.000271761
263460_at	18560	AT2G31810	acetolactate synthase small subunit, putative	0.641814	1.56029	10.0962	1094.6	10.9261	1.27983e-06	5.52894e-05
246219_at	1319	AT4G36760	ATAPP1 (aminopeptidase P1)	0.641085	1.5595	10.0704	1075.23	9.36693	4.81449e-06	0.000145648
263588_s_at	18688	AT2G25330;AT2G25320	[AT2G25330, meprin and TRAF homology domain-containing protein / MATH domain-containing protein];[AT2G25320, similar to meprin and TRAF homology domain-containing protein / MATH domain-containing protein [Arabidopsis thaliana] (TAIR:AT2G25330.1); similar to unknown [Populus trichocarpa] (GB:ABG37643.1); similar to unknown [Populus trichocarpa] (GB:ABG37644.1); similar to MATH [Medicago truncatula…	0.639482	1.55777	5.81729	56.387	7.66705	2.55536e-05	0.000489403
264195_at	19295	AT1G22690	gibberellin-responsive protein, putative	0.63909	1.55735	8.44995	349.694	9.4224	4.57868e-06	0.000140944
260676_at	15776	AT1G19450	integral membrane protein, putative / sugar transporter family protein	0.637459	1.55559	10.0798	1082.27	8.59831	9.91189e-06	0.000239502
246860_at	1960	AT5G25840	similar to unknown protein [Arabidopsis thaliana] (TAIR:AT1G79770.1); similar to Os06g0554200 [Oryza sativa (japonica cultivar-group)] (GB:NP_001057846.1); similar to Os01g0199700 [Oryza sativa (japonica cultivar-group)] (GB:NP_001042311.1); similar to hypothetical protein [Oryza sativa (japonica cultivar-group)] (GB:BAD26169.1); contains InterPro domain Protein of unknown function DUF1677, plant…	0.637335	1.55545	7.27381	154.751	7.18745	4.30793e-05	0.000720937
248890_at	3990	AT5G46270	disease resistance protein (TIR-NBS-LRR class), putative	0.636854	1.55493	5.64956	50.1982	6.62801	8.18637e-05	0.00116707
253997_at	9097	AT4G26090;AT4G26095	[AT4G26090, RPS2 (RESISTANT TO P. SYRINGAE 2)]	0.636678	1.55475	6.18388	72.7001	6.5125	9.3904e-05	0.00129658
250467_at	5567	AT5G10100	trehalose-6-phosphate phosphatase, putative	0.636535	1.55459	5.21232	37.0736	8.98847	6.8272e-06	0.000185945
249869_at	4969	AT5G23050	acyl-activating enzyme 17 (AAE17)	0.636336	1.55438	9.25869	612.554	7.57138	2.83036e-05	0.000530053
251713_at	6813	AT3G56080	dehydration-responsive protein-related	0.636079	1.5541	7.42444	171.783	8.44375	1.15327e-05	0.000266999
262705_at	17805	AT1G16260	protein kinase family protein	0.635901	1.55391	5.43313	43.205	8.63876	9.53017e-06	0.000233218
249493_at	4593	AT5G39080	transferase family protein	0.635872	1.55388	6.44795	87.3026	8.85012	7.78028e-06	0.000202528
249923_at	5023	AT5G19120	pepsin A	0.63586	1.55386	11.981	4042.44	8.91353	7.32649e-06	0.000195688
253264_at	8364	AT4G33950	OST1 (OPEN STOMATA 1); kinase/ protein kinase	0.635156	1.55311	8.84356	459.387	9.87172	3.07555e-06	0.000104932
253702_at	8802	AT4G29900	ACA10 (autoinhibited Ca2+ -ATPase 10); calcium-transporting ATPase/ calmodulin binding	0.634875	1.5528	9.86791	934.407	9.29936	5.11989e-06	0.000151774
254688_at	9788	AT4G13830	J20 (DNAJ-LIKE 20); heat shock protein binding	0.634569	1.55247	9.68235	821.634	8.75012	8.55985e-06	0.000215985
254027_at	9127	AT4G25835	AAA-type ATPase family protein	0.634221	1.5521	7.61231	195.675	8.4819	1.11072e-05	0.000260241
249237_at	4337	AT5G42050	similar to unknown protein [Arabidopsis thaliana] (TAIR:AT3G27090.1); similar to N-rich protein [Glycine max] (GB:CAI44933.1); contains domain KELCH-RELATED PROTEINS (PTHR23230); contains domain no description (SM00767); contains domain gb def: Hypothetical protein At5g42050 (PTHR23230:SF16)	0.63415	1.55202	9.39104	671.408	9.43213	4.53866e-06	0.00014009
248759_at	3859	AT5G47610	zinc finger (C3HC4-type RING finger) family protein	0.63183	1.54953	7.24709	151.911	7.4918	3.08377e-05	0.000565896
246251_at	1351	AT4G37220	stress-responsive protein, putative	0.631755	1.54945	7.12857	139.931	7.67655	2.5297e-05	0.000485711
258107_at	13207	AT3G23560	ALF5 (ABERRANT LATERAL ROOT FORMATION 5); antiporter/ transporter	0.630634	1.54825	9.14813	567.363	10.356	2.0366e-06	7.80752e-05
263419_at	18519	AT2G17220	protein kinase, putative	0.629845	1.5474	8.34956	326.187	9.89609	3.01121e-06	0.000103328
260401_at	15501	AT1G69840	band 7 family protein	0.629782	1.54733	9.8861	946.265	8.2908	1.34264e-05	0.000300125
246012_at	1112	AT5G10650	zinc finger (C3HC4-type RING finger) family protein	0.629624	1.54716	6.99806	127.828	7.18461	4.32161e-05	0.000722167
256245_at	11345	AT3G12580	HSP70 (heat shock protein 70); ATP binding	0.628835	1.54632	7.41757	170.967	8.32275	1.30043e-05	0.00029311
258114_at	13214	AT3G14660	CYP72A13 (cytochrome P450, family 72, subfamily A, polypeptide 13); oxygen binding	0.627801	1.54521	8.85512	463.08	8.29986	1.33051e-05	0.000298711
245951_at	1051	AT5G19550	ASP2 (ASPARTATE AMINOTRANSFERASE 2)	0.627754	1.54516	9.9756	1006.83	8.70965	8.89934e-06	0.000222337
255568_at	10668	AT4G01250	WRKY22 (WRKY DNA-binding protein 22); transcription factor	0.627732	1.54513	5.94249	61.4989	5.47059	0.000349965	0.00351406
255596_at	10696	AT4G01720	WRKY47 (WRKY DNA-binding protein 47); transcription factor	0.62719	1.54455	5.50666	45.4644	7.05399	5.00438e-05	0.000809574
264445_at	19545	AT1G27290	similar to conserved hypothetical protein [Medicago truncatula] (GB:ABE92577.1); contains InterPro domain Penicillin-binding protein, transpeptidase fold; (InterPro:IPR012338)	0.627054	1.54441	10.8264	1815.8	8.67522	9.19978e-06	0.000227847
260243_at	15343	AT1G63720	similar to hydroxyproline-rich glycoprotein family protein [Arabidopsis thaliana] (TAIR:AT4G25620.1); similar to unknown [Thellun (GB:ABJ98061.1)	0.626765	1.5441	6.01029	64.4579	6.54852	8.99552e-05	0.0012542
257791_at	12891	AT3G27110	peptidase M48 family protein	0.626009	1.54329	8.9902	508.535	7.46847	3.1627e-05	0.000574718
257766_at	12866	AT3G23030	IAA2 (indoleacetic acid-induced protein 2); transcription factor	0.625709	1.54297	8.00622	257.106	9.12967	5.98476e-06	0.000168951
260876_at	15976	AT1G21460	nodulin MtN3 family protein	0.625393	1.54263	11.5222	2941.25	9.95912	2.85152e-06	9.99128e-05
246947_at	2047	AT5G25120	CYP71B11 (cytochrome P450, family 71, subfamily B, polypeptide 11); oxygen binding	0.624671	1.54186	5.5561	47.0494	5.23325	0.00048212	0.00447039
258652_at	13752	AT3G09910	AtRABC2b/AtRab18C (Arabidopsis Rab GTPase homolog C2b); GTP binding	0.624475	1.54165	5.84061	57.3057	5.92315	0.000194162	0.00227015
262284_at	17384	AT1G68670	HHO2; MYB family transcription factor	0.623628	1.54075	9.8969	953.377	7.25423	3.99974e-05	0.000685971
248028_at	3128	AT5G55620	similar to unknown protein [Arabidopsis thaliana] (TAIR:AT3G09950.1); similar to Os06g0523300 [Oryza sativa (japonica cultivar-group)] (GB:NP_001057752.1); similar to unknown protein [Oryza sativa (japonica cultivar-group)] (GB:BAD45825.1)	0.622247	1.53927	9.07141	537.979	8.33	1.29105e-05	0.000291285
256892_at	11992	AT3G19000	oxidoreductase, 2OG-Fe(II) oxygenase family protein	0.621861	1.53886	8.38503	334.306	8.99848	6.76339e-06	0.000185202
257530_at	12630	AT3G03040	F-box family protein	0.621241	1.5382	6.65781	100.972	5.41885	0.000375027	0.00369679
246028_at	1128	AT5G21170	5'-AMP-activated protein kinase beta-2 subunit, putative	0.621141	1.53809	10.3905	1342.26	7.37075	3.51802e-05	0.000622062
245084_at	184	AT2G23290	AtMYB70 (myb domain protein 70); DNA binding / transcription factor	0.620972	1.53791	8.39819	337.369	10.0717	2.58892e-06	9.28509e-05
246270_at	1370	AT4G36500	similar to unknown protein [Arabidopsis thaliana] (TAIR:AT2G18210.1); similar to hypothetical protein [Thellun (GB:ABB45855.1)	0.620741	1.53767	7.43666	173.243	6.889	6.03991e-05	0.000933403
255521_at	10621	AT4G02280	SUS3; UDP-glycosyltransferase/ sucrose synthase/ transferase, transferring glycosyl groups	0.61965	1.5365	5.97838	63.0482	7.80456	2.20993e-05	0.000433807
251060_at	6160	AT5G01820	ATSR1 (SERINE/THREONINE PROTEIN KINASE 1); kinase	0.619303	1.53613	9.23703	603.426	6.67842	7.7145e-05	0.00111302
261253_at	16353	AT1G05840	aspartyl protease family protein	0.619282	1.53611	8.54303	372.999	7.44519	3.24365e-05	0.000586327
260302_at	15402	AT1G80310	sulfate transporter	0.61905	1.53586	8.95251	495.421	7.06303	4.95352e-05	0.000803054
265478_at	20578	AT2G15890	MEE14 (maternal effect embryo arrest 14)	0.6189	1.5357	12.0164	4142.8	9.29859	5.12347e-06	0.000151774
246996_at	2096	AT5G67420	LBD37; LOB domain protein 37 / lateral organ boundaries domain protein 37	0.617577	1.5343	9.932	976.853	9.65971	3.70367e-06	0.000119561
257205_at	12305	AT3G16520	UDP-glucoronosyl/UDP-glucosyl transferase family protein	0.61681	1.53348	10.2976	1258.64	9.40812	4.63814e-06	0.000142199
247212_at	2312	AT5G65040	senescence-associated protein-related	0.616716	1.53338	7.19148	146.167	6.57567	8.70978e-05	0.00122409
265699_at	20799	AT2G03550	similar to unknown protein [Arabidopsis thaliana] (TAIR:AT3G48690.1); similar to unknown protein [Arabidopsis thaliana] (TAIR:AT3G48700.1); similar to Esterase/lipase/thioesterase [Medicago truncatula] (GB:ABE83378.1); contains InterPro domain Esterase/lipase/thioesterase; (InterPro:IPR000379); contains InterPro domain Alpha/beta hydrolase fold-3; (InterPro:IPR013094)	0.616162	1.53279	9.8243	906.586	8.26503	1.37777e-05	0.000305116
267571_at	22671	AT2G30650	ATP-dependent caseinolytic (Clp) protease/crotonase family protein	0.615556	1.53215	5.53112	46.2415	5.96566	0.000183969	0.00218332
250000_at	5100	AT5G18650	zinc finger (C3HC4-type RING finger) family protein	0.615351	1.53193	10.7129	1678.43	9.21577	5.52742e-06	0.000160334
261663_at	16763	AT1G18330	EPR1 (EARLY-PHYTOCHROME-RESPONSIVE1); DNA binding / transcription factor	0.613377	1.52984	8.68646	411.988	8.58441	1.00469e-05	0.000241741
264701_at	19801	AT1G70160	similar to unknown protein [Arabidopsis thaliana] (TAIR:AT5G54870.1); similar to unknown protein [Arabidopsis thaliana] (TAIR:AT4G27020.1); similar to unknown protein [Oryza sativa (japonica cultivar-group)] (GB:BAD53001.1); similar to unknown protein [Oryza sativa (japonica cultivar-group)] (GB:BAB89049.1); similar to conserved hypothetical protein [Medicago truncatula] (GB:ABE93629.1)	0.612933	1.52937	11.7743	3502.87	10.3117	2.11355e-06	8.02165e-05
264400_at	19500	AT1G61800	GPT2 (glucose-6-phosphate/phosphate translocator 2); antiporter/ glucose-6-phosphate transporter	0.612219	1.52861	5.71007	52.3484	5.13952	0.000548348	0.00491273
247780_at	2880	AT5G58770	dehydrodolichyl diphosphate synthase, putative / DEDOL-PP synthase, putative	0.612139	1.52852	6.6841	102.829	4.98751	0.000677459	0.00581691
266369_at	21469	AT2G41370	BOP2 (BLADE ON PETIOLE2); BTB-POZ domain transcriptional regulator	0.612087	1.52847	8.34193	324.469	7.16636	4.41058e-05	0.000734569
265962_at	21062	AT2G37460	nodulin MtN21 family protein	0.61158	1.52793	7.62453	197.339	6.48455	9.70986e-05	0.0013304
246975_at	2075	AT5G24890	similar to unknown protein [Arabidopsis thaliana] (TAIR:AT4G31510.1); similar to putative KID-containing protein [Brassica napus] (GB:AAO53442.1)	0.611308	1.52764	10.0239	1041.11	8.70544	8.93553e-06	0.000222753
266693_at	21793	AT2G19800	MIOX2 (MYO-INOSITOL OXYGENASE 2)	0.610517	1.52681	7.76512	217.537	6.40339	0.000107061	0.00143398
251928_at	7028	AT3G53980	protease inhibitor/seed storage/lipid transfer protein (LTP) family protein	0.610401	1.52668	8.20676	295.448	4.69863	0.00102184	0.00790109
256168_at	11268	AT1G51805	leucine-rich repeat protein kinase, putative	0.610331	1.52661	8.26224	307.032	4.81529	0.000864307	0.00698118
249486_at	4586	AT5G39030	protein kinase family protein	0.610319	1.5266	4.99346	31.8552	4.87587	0.000792952	0.00651323
267490_at	22590	AT2G19130	S-locus lectin protein kinase family protein	0.609085	1.52529	6.60046	97.037	8.78755	8.25851e-06	0.000210712
252592_at	7692	AT3G45640	ATMPK3 (MITOGEN-ACTIVATED PROTEIN KINASE 3); MAP kinase/ kinase/ protein kinase	0.608982	1.52518	9.17329	577.345	10.3207	2.09768e-06	7.97466e-05
255921_at	11021	AT1G22240	APUM8 (ARABIDOPSIS PUMILIO 8); RNA binding	0.608831	1.52502	5.78162	55.0101	10.026	2.69212e-06	9.57992e-05
253812_at	8912	AT4G28240	wound-responsive protein-related	0.608645	1.52483	10.9373	1960.9	7.05547	4.99598e-05	0.000808789
264107_s_at	19207	AT2G13790;AT2G13800	[AT2G13790, ATSERK4 (SOMATIC EMBRYOGENESIS RECEPTOR-LIKE KINASE 4); protein binding / protein kinase/ transmembrane receptor protein serine/threonine kinase];[AT2G13800, ATSERK5 (SOMATIC EMBRYOGENESIS RECEPTOR LIKE KINASE 5); ATP binding / protein kinase/ transmembrane receptor protein serine/threonine kinase]	0.607489	1.52361	7.6207	196.816	6.02413	0.000170889	0.00206351
264512_at	19612	AT1G09575	similar to unknown protein [Arabidopsis thaliana] (TAIR:AT1G57610.2); similar to Os12g0122100 [Oryza sativa (japonica cultivar-group)] (GB:NP_001066028.1); similar to hypothetical protein LOC_Os11g03130 [Oryza sativa (japonica cultivar-group)] (GB:ABA91271.1); similar to Os01g0817000 [Oryza sativa (japonica cultivar-group)] (GB:NP_001044621.1); contains InterPro domain Protein of unknown function…	0.605345	1.52134	6.76458	108.728	6.59122	8.5506e-05	0.00120842
267472_at	22572	AT2G02850	ARPN (PLANTACYANIN); copper ion binding	0.604146	1.52008	9.82907	909.589	4.8915	0.000775583	0.00640595
260581_at	15681	AT2G47190	MYB2 (myb domain protein 2); DNA binding / transcription factor	0.603565	1.51947	5.88895	59.2586	4.82047	0.000857949	0.00693473
266335_at	21435	AT2G32440	KAO2 (ENT-KAURENOIC ACID HYDROXYLASE 2); oxygen binding	0.603547	1.51945	8.19507	293.064	9.52876	4.16125e-06	0.000131034
245096_at	196	AT2G40880	FL3-27; cysteine protease inhibitor	0.603225	1.51911	10.5551	1504.56	7.96207	1.87569e-05	0.000384407
265823_at	20923	AT2G35760	integral membrane family protein	0.602663	1.51852	8.25233	304.93	8.47416	1.11921e-05	0.000260767
245208_at	308	AT5G12330	LRP1 (LATERAL ROOT PRIMORDIUM 1); RING finger-like zinc finger protein	0.601605	1.5174	6.94121	122.888	7.49423	3.07566e-05	0.000565317
264648_at	19748	AT1G09080	luminal binding protein 3 (BiP-3) (BP3)	0.60131	1.51709	4.98827	31.7408	9.16822	5.77507e-06	0.000164868
259598_at	14698	AT1G27980	pyridoxal-dependent decarboxylase family protein	0.600699	1.51645	8.9712	501.881	8.8413	7.84583e-06	0.000203557
262925_at	18025	AT1G65730	YSL7 (YELLOW STRIPE LIKE 7); oligopeptide transporter	0.60066	1.51641	8.71255	419.506	9.50733	4.24186e-06	0.000132362
266483_at	21583	AT2G47910	CRR6 (CHLORORESPIRATORY REDUCTION 6)	0.60026	1.51599	9.42897	689.29	9.73228	3.47408e-06	0.000113693
251426_at	6526	AT3G60180	uridylate kinase, putative / uridine monophosphate kinase, putative / UMP kinase, putative	0.599963	1.51568	8.12875	279.897	7.91913	1.96096e-05	0.000395835
260986_at	16086	AT1G53580	ETHE1/GLX2-3 (GLYOXALASE 2-3); hydroxyacylglutathione hydrolase	0.599852	1.51556	9.82294	905.733	9.61488	3.85377e-06	0.000123461
265200_s_at	20300	AT2G36800;AT2G36792;AT2G36790	[AT2G36800, DOGT1 (DON-GLUCOSYLTRANSFERASE); UDP-glycosyltransferase/ transferase, transferring glycosyl groups];[AT2G36790, UGT73C6 (UDP-glucosyl transferase 73C6); UDP-glucosyltransferase/ UDP-glycosyltransferase/ transferase, transferring glycosyl groups]	0.599256	1.51494	6.91456	120.64	8.40283	1.20088e-05	0.000274746
249784_at	4884	AT5G24280	ATP binding	0.599094	1.51476	7.45427	175.371	4.73121	0.000974969	0.00764739
253147_at	8247	AT4G35600	CONNEXIN 32; kinase	0.599094	1.51476	7.49075	179.862	8.83577	7.88722e-06	0.000203977
260900_s_at	16000	AT1G21400;AT5G34780	[AT1G21400, 2-oxoisovalerate dehydrogenase, putative / 3-methyl-2-oxobutanoate dehydrogenase, putative / branched-chain alpha-keto acid dehydrogenase E1 alpha subunit, putative];[AT5G34780, dehydrogenase E1 component family protein]	0.598979	1.51464	9.1486	567.549	8.26331	1.38015e-05	0.000305346
254741_s_at	9841	AT4G13920;AT4G13900	[AT4G13920, disease resistance family protein / LRR family protein]	0.598673	1.51432	5.02548	32.5702	6.44936	0.000101289	0.00137361
249974_at	5074	AT5G18780	F-box family protein	0.598622	1.51427	6.87879	117.686	6.04577	0.000166306	0.00202533
264973_at	20073	AT1G27040	nitrate transporter, putative	0.598492	1.51413	7.15924	142.938	6.65449	7.93473e-05	0.00113831
245285_s_at	385	AT4G14030;AT4G14040	[AT4G14030, selenium-binding protein, putative];[AT4G14040, EDA38 (embryo sac development arrest 38); selenium binding]	0.597735	1.51334	9.50229	725.226	9.59572	3.91994e-06	0.000125229
254955_at	10055	AT4G10920	KELP; DNA binding / transcription coactivator	0.59747	1.51306	8.50334	362.878	8.58841	1.00079e-05	0.000241193
253174_at	8274	AT4G35090	CAT2 (CATALASE 2); catalase	0.597449	1.51304	11.4284	2756.08	6.86253	6.22678e-05	0.000953245
245505_at	605	AT4G15690	glutaredoxin family protein	0.59744	1.51303	5.52674	46.1015	4.63796	0.00111568	0.00842674
246305_at	1405	AT3G51890	similar to unknown protein [Arabidopsis thaliana] (TAIR:AT2G40060.1); similar to conserved hypothetical protein [Medicago truncatula] (GB:ABE83515.1); contains InterPro domain Clathrin light chain; (InterPro:IPR000996)	0.597088	1.51266	8.09865	274.118	6.89102	6.0259e-05	0.000932501
259743_at	14843	AT1G71140	MATE efflux family protein	0.597055	1.51263	7.12728	139.806	5.48071	0.000345279	0.00348822
247696_at	2796	AT5G59780	MYB59 (myb domain protein 59); DNA binding / transcription factor	0.595872	1.51139	6.0792	67.6115	6.60636	8.3986e-05	0.00119063
247903_at	3003	AT5G57340	similar to unknown protein [Arabidopsis thaliana] (TAIR:AT5G67390.2); similar to conserved hypothetical protein [Medicago truncatula] (GB:ABE83997.1)	0.594815	1.51028	5.83355	57.0261	6.56457	8.82537e-05	0.00123501
252591_at	7691	AT3G45600	TET3 (TETRASPANIN3)	0.594617	1.51007	8.37617	332.26	8.91671	7.30452e-06	0.000195559
247899_at	2999	AT5G57345	similar to unknown protein [Arabidopsis thaliana] (TAIR:AT1G54520.1); similar to conserved hypothetical protein [Medicago truncatula] (GB:ABE83998.1); contains domain N-terminal nucleophile aminohydrolases (Ntn hydrolases) (SSF56235)	0.594536	1.50999	10.0431	1055.02	9.81668	3.22653e-06	0.00010855
249415_at	4515	AT5G39660	CDF2 (CYCLING DOF FACTOR 2); DNA binding / protein binding / transcription factor	0.594414	1.50986	7.85198	231.038	8.86133	7.69785e-06	0.000200767
266150_s_at	21250	AT2G12290;AT4G19700	[AT2G12290, similar to protein binding / zinc ion binding [Arabidopsis thaliana] (TAIR:AT4G19700.1); similar to Zinc finger, RING-type [Medicago truncatula] (GB:ABE88778.1)];[AT4G19700, protein binding / zinc ion binding]	0.591287	1.50659	8.1145	277.146	6.14098	0.000147667	0.00185478
259671_at	14771	AT1G52290	protein kinase family protein	0.591087	1.50638	7.96823	250.425	9.67298	3.66046e-06	0.000118433
266364_at	21464	AT2G41230	similar to ARL (ARGOS-LIKE) [Arabidopsis thaliana] (TAIR:AT2G44080.1); similar to hypothetical protein LOC_Os12g10750 [Oryza sativa (japonica cultivar-group)] (GB:ABA96704.1); similar to Os11g0247000 [Oryza sativa (japonica cultivar-group)] (GB:NP_001067611.1)	0.591043	1.50634	6.03379	65.5169	4.07255	0.00259506	0.016129
259500_at	14600	AT1G15740	leucine-rich repeat family protein	0.59079	1.50607	9.79526	888.52	9.82994	3.18942e-06	0.000107619
250105_at	5205	AT5G16630	DNA repair protein Rad4 family	0.590704	1.50598	7.75627	216.207	6.58182	8.64643e-05	0.00121807
254629_at	9729	AT4G18425	similar to unknown protein [Arabidopsis thaliana] (TAIR:AT5G46090.1); similar to unknown protein [Oryza sativa (japonica cultivar-group)] (GB:AAU10653.1); contains InterPro domain Protein of unknown function DUF679; (InterPro:IPR007770)	0.589835	1.50507	7.24634	151.833	6.58493	8.61455e-05	0.0012152
267461_at	22561	AT2G33830	dormancy/auxin associated family protein	0.589323	1.50454	12.9496	7910.93	9.02679	6.5864e-06	0.000182768
250735_at	5835	AT5G06280	similar to unknown protein [Arabidopsis thaliana] (TAIR:AT3G52520.1)	0.589208	1.50442	7.38477	167.124	5.82848	0.000219119	0.00248662
254496_at	9596	AT4G20070	ATAAH (ARABIDOPSIS THALIANA ALLANTOATE AMIDOHYDROLASE); allantoate deiminase/ metallopeptidase	0.588818	1.50401	6.1896	72.9888	7.37134	3.51574e-05	0.000622062
263081_at	18181	AT2G27220	BLH5 (BELL1-LIKE HOMEODOMAIN 5); DNA binding / transcription factor	0.588546	1.50373	5.66184	50.6271	5.15389	0.000537592	0.00484109
262682_at	17782	AT1G75900	family II extracellular lipase 3 (EXL3)	0.588081	1.50325	10.1246	1116.39	6.87832	6.11454e-05	0.000940477
263901_at	19001	AT2G36320	zinc finger (AN1-like) family protein	0.58789	1.50305	10.0961	1094.52	9.74319	3.44092e-06	0.00011288
256098_at	11198	AT1G13700	glucosamine/galactosamine-6-phosphate isomerase family protein	0.587696	1.50284	9.44077	694.954	8.67967	9.16036e-06	0.0002274
254120_at	9220	AT4G24570	mitochondrial substrate carrier family protein	0.587525	1.50267	7.31277	158.987	5.97832	0.000181049	0.00215651
254638_at	9738	AT4G18740	transcription termination factor	0.587332	1.50247	5.69492	51.8015	6.88927	6.03807e-05	0.000933403
252004_at	7104	AT3G52780	ATPAP20/PAP20; acid phosphatase/ protein serine/threonine phosphatase	0.587225	1.50235	7.05898	133.341	5.64072	0.000279515	0.0029905
262183_at	17283	AT1G77890	similar to unknown protein [Arabidopsis thaliana] (TAIR:AT4G08540.1); similar to unknown protein [Oryza sativa (japonica cultivar-group)] (GB:BAC79707.1); similar to Os07g0626300 [Oryza sativa (japonica cultivar-group)] (GB:NP_001060335.1); contains domain DNA-DIRECTED RNA POLYMERASE II (PTHR21297)	0.586912	1.50203	6.32892	80.3888	7.87009	2.06357e-05	0.000412532
260856_at	15956	AT1G21910	AP2 domain-containing transcription factor family protein	0.586444	1.50154	5.6656	50.7595	8.02293	1.76171e-05	0.000367991
245265_at	365	AT4G14400	ACD6 (ACCELERATED CELL DEATH 6); protein binding	0.585638	1.5007	4.61424	24.492	5.52028	0.000327593	0.00336291
266021_at	21121	AT2G05910	similar to unknown protein [Arabidopsis thaliana] (TAIR:AT5G20640.1); similar to Os03g0179700 [Oryza sativa (japonica cultivar-group)] (GB:NP_001049157.1); similar to Protein of unknown function DUF567 [Medicago truncatula] (GB:ABE88870.1); similar to Os04g0446000 [Oryza sativa (japonica cultivar-group)] (GB:NP_001052906.1); contains InterPro domain Protein of unknown function DUF567; (InterPro:I…	0.585048	1.50009	5.44197	43.4707	9.31299	5.05662e-06	0.00015078
251050_at	6150	AT5G02440	similar to unknown protein [Arabidopsis thaliana] (TAIR:AT3G17950.1)	-0.586113	0.666135	6.03839	65.7258	-8.67951	9.16179e-06	0.0002274
263047_at	18147	AT2G17630	phosphoserine aminotransferase, putative	-0.586622	0.6659	8.65697	403.652	-6.99119	5.37378e-05	0.000854188
250794_at	5894	AT5G05270	chalcone-flavanone isomerase family protein	-0.586775	0.66583	9.58793	769.579	-8.747	8.58549e-06	0.000216392
247759_at	2859	AT5G59040	COPT3 (Copper transporter 3); copper ion transporter	-0.587209	0.665629	6.24631	75.9151	-5.74525	0.000243943	0.00269506
258767_at	13867	AT3G10890	(1-4)-beta-mannan endohydrolase, putative	-0.587235	0.665617	5.77831	54.8837	-7.19647	4.26482e-05	0.000715288
264289_at	19389	AT1G61890	MATE efflux family protein	-0.587792	0.665361	9.11813	555.688	-6.90001	5.96403e-05	0.00092481
247830_at	2930	AT5G58530	glutaredoxin family protein	-0.590605	0.664064	7.69437	207.127	-7.4164	3.34688e-05	0.000599233
257102_at	12202	AT3G25050	XTH3 (XYLOGLUCAN ENDOTRANSGLUCOSYLASE/HYDROLASE 3); hydrolase, acting on glycosyl bonds	-0.590777	0.663985	11.2684	2466.73	-6.14425	0.000147068	0.00184827
263664_at	18764	AT1G04250	AXR3 (AUXIN RESISTANT 3); AUX/IAA protein	-0.591434	0.663683	7.20631	147.678	-8.18729	1.49001e-05	0.000325859
265649_at	20749	AT2G27510	ATFD3 (FERREDOXIN 3); electron carrier	-0.592059	0.663395	10.2891	1251.18	-4.95959	0.000704542	0.00598979
253050_at	8150	AT4G37450	AGP18 (Arabinogalactan protein 18)	-0.592753	0.663076	8.40471	338.898	-6.43271	0.00010334	0.00139644
252011_at	7111	AT3G52720	carbonic anhydrase family protein	-0.5928	0.663055	6.30468	79.0495	-7.65748	2.5815e-05	0.00049358
255675_at	10775	AT4G00480	ATMYC1 (Arabidopsis thaliana myc-related transcription factor 1); DNA binding / transcription factor	-0.592883	0.663017	7.19845	146.875	-5.14595	0.000543507	0.00488663
258727_at	13827	AT3G11930	universal stress protein (USP) family protein	-0.593569	0.662702	10.8856	1891.89	-6.11502	0.000152513	0.00190507
263951_at	19051	AT2G35960	NHL12 (NDR1/HIN1-like 12)	-0.594133	0.662442	8.93297	488.755	-7.09986	4.75204e-05	0.000774796
253226_at	8326	AT4G35010	BGAL11 (beta-galactosidase 11); beta-galactosidase	-0.594456	0.662294	7.01577	129.407	-4.25216	0.00197496	0.0131453
265443_at	20543	AT2G20750	ATEXPB1 (ARABIDOPSIS THALIANA EXPANSIN B1)	-0.594464	0.662291	6.11054	69.0963	-8.16838	1.5188e-05	0.000330255
250892_at	5992	AT5G03760	ATCSLA09 (RESISTANT TO AGROBACTERIUM TRANSFORMATION 4); transferase, transferring glycosyl groups	-0.594811	0.662131	7.74253	214.158	-6.14737	0.0001465	0.00184317
265920_s_at	21020	AT2G15120;AT2G15220	[AT2G15220, secretory protein, putative]	-0.594939	0.662072	5.13546	35.1503	-6.25377	0.000128466	0.00166117
247812_at	2912	AT5G58390	peroxidase, putative	-0.595335	0.661891	7.00945	128.841	-4.89162	0.000775446	0.00640595
245133_at	233	AT2G45310;AT2G45315	[AT2G45310, GAE4 (UDP-D-GLUCURONATE 4-EPIMERASE 4); catalytic]	-0.596014	0.661579	7.33322	161.257	-5.42788	0.000370515	0.00366799
257017_at	12117	AT3G19620	glycosyl hydrolase family 3 protein	-0.596162	0.661511	7.31467	159.197	-5.36499	0.000403184	0.00390811
253842_at	8942	AT4G27860	integral membrane family protein	-0.596618	0.661302	6.18896	72.9565	-4.93602	0.000728305	0.00613012
259516_at	14616	AT1G20450	ERD10/LTI45 (EARLY RESPONSIVE TO DEHYDRATION 10)	-0.596705	0.661263	10.8489	1844.31	-7.53676	2.9377e-05	0.000546119
250864_at	5964	AT5G03870	glutaredoxin family protein	-0.596804	0.661217	6.88162	117.916	-5.74906	0.000242744	0.00268898
261222_at	16322	AT1G20120	family II extracellular lipase, putative	-0.597112	0.661076	10.2481	1216.12	-6.73575	7.21351e-05	0.00106214
258633_at	13733	AT3G07990	SCPL27 (serine carboxypeptidase-like 27); serine carboxypeptidase	-0.59738	0.660953	6.79413	110.978	-6.58876	8.57558e-05	0.00121045
246597_at	1697	AT5G14760	AO (L-ASPARTATE OXIDASE); L-aspartate oxidase	-0.598639	0.660377	7.73796	213.48	-5.891	0.000202272	0.00234323
266108_at	21208	AT2G37900	proton-dependent oligopeptide transport (POT) family protein	-0.598712	0.660343	6.23656	75.4036	-8.14749	1.55132e-05	0.000334457
253498_at	8598	AT4G31890	armadillo/beta-catenin repeat family protein	-0.599221	0.66011	6.97225	125.561	-6.97606	5.4671e-05	0.000862485
257571_at	12671	AT3G16870	GATA17; GATA zinc finger transcription factor family protein	-0.600626	0.659468	8.21025	296.164	-6.40264	0.00010716	0.00143445
247546_at	2646	AT5G61605	similar to unknown protein [Arabidopsis thaliana] (TAIR:AT2G16505.1)	-0.601527	0.659056	8.84382	459.468	-5.24138	0.000476794	0.00443543
262752_at	17852	AT1G16330	CYCB3;1 (CYCLIN B3;1); cyclin-dependent protein kinase	-0.60203	0.658826	7.52314	183.946	-6.90742	5.91348e-05	0.000917596
249303_at	4403	AT5G41460	fringe-related protein	-0.602134	0.658779	8.36425	329.526	-9.03515	6.53509e-06	0.000181787
263297_at	18397	AT2G15310	ATARFB1A (ADP-ribosylation factor B1A); GTP binding	-0.602437	0.658641	6.67435	102.136	-5.71934	0.00025228	0.00276393
248865_at	3965	AT5G46790	similar to unknown protein [Arabidopsis thaliana] (TAIR:AT4G17870.1); similar to Streptomyces cyclase/dehydrase family protein [Brassica oleracea] (GB:ABD65175.1); contains domain Bet v1-like (SSF55961); contains domain no description (G3D.3.30.530.20)	-0.602518	0.658603	7.76158	217.004	-5.87478	0.000206503	0.00237896
248042_at	3142	AT5G55960	similar to Unknown protein [Medicago truncatula] (GB:ABE89316.1); similar to Os06g0297700 [Oryza sativa (japonica cultivar-group)] (GB:NP_001057438.1); contains domain TRANSMEMBRANE PROTEIN (PTHR21716)	-0.603274	0.658258	8.08202	270.975	-8.58782	1.00136e-05	0.000241193
247933_at	3033	AT5G56980	similar to unknown protein [Arabidopsis thaliana] (TAIR:AT4G26130.1); similar to cDNA-5-encoded protein (GB:AAA50235.1)	-0.603563	0.658126	6.37089	82.7618	-8.87937	7.56724e-06	0.000198401
262232_at	17332	AT1G68600	similar to unknown protein [Arabidopsis thaliana] (TAIR:AT1G25480.1); similar to unknown protein [Arabidopsis thaliana] (TAIR:AT2G17470.1); similar to Putative expressed protein [Brassica oleracea] (GB:AAW81734.1); contains InterPro domain Protein of unknown function UPF0005; (InterPro:IPR006214)	-0.603883	0.657981	5.22744	37.4642	-7.20853	4.20795e-05	0.000708887
247657_at	2757	AT5G59845	gibberellin-regulated family protein	-0.604018	0.657919	9.85669	927.168	-6.89652	5.98797e-05	0.000927262
245246_at	346	AT1G44224	Encodes a ECA1 gametogenesis related family protein	-0.604029	0.657914	9.3147	636.801	-5.83759	0.000216574	0.00246264
250753_at	5853	AT5G05860	UGT76C2 (UDP-glucosyl transferase 76C2); UDP-glycosyltransferase/ transferase, transferring glycosyl groups	-0.604286	0.657797	7.04441	132.001	-5.87538	0.000206348	0.00237837
250108_at	5208	AT5G15150	ATHB-3 (ARABIDOPSIS THALIANA HOMEOBOX 3); DNA binding / transcription factor	-0.605379	0.657299	5.71952	52.6922	-9.38911	4.71862e-06	0.000143509
260331_at	15431	AT1G80270	pentatricopeptide repeat-containing protein	-0.60612	0.656961	9.09534	546.978	-9.5427	4.1097e-06	0.000129837
251019_at	6119	AT5G02420	similar to unknown protein [Arabidopsis thaliana] (TAIR:AT1G08180.1)	-0.606255	0.6569	6.46363	88.2567	-5.72486	0.000250479	0.00274552
248382_at	3482	AT5G51890	peroxidase	-0.607069	0.656529	9.73824	854.086	-9.94058	2.89751e-06	0.00010075
248625_at	3725	AT5G48880	KAT5/PKT1/PKT2 (PEROXISOMAL 3-KETO-ACYL-COA THIOLASE 1, PEROXISOMAL 3-KETO-ACYL-COA THIOLASE 2); acetyl-CoA C-acyltransferase	-0.607771	0.65621	10.2691	1233.96	-8.89639	7.44622e-06	0.000197555
249190_at	4290	AT5G42750	similar to unknown protein [Arabidopsis thaliana] (TAIR:AT5G26230.1); similar to BRI1-KD interacting protein 119 [Oryza sativa (japonica cultivar-group)] (GB:BAD38522.1)	-0.608136	0.656044	7.24214	151.392	-7.30324	3.78888e-05	0.000656639
266920_at	22020	AT2G45750	dehydration-responsive family protein	-0.608359	0.655942	7.83969	229.077	-8.41653	1.1847e-05	0.00027241
249174_at	4274	AT5G42900	similar to unknown protein [Arabidopsis thaliana] (TAIR:AT4G33980.1); similar to hypothetical protein MtrDRAFT_AC151424g24v1 [Medicago truncatula] (GB:ABE88920.1)	-0.608732	0.655773	7.53267	185.166	-7.26296	3.96127e-05	0.000680691
258017_at	13117	AT3G19370	similar to transport protein-related [Arabidopsis thaliana] (TAIR:AT2G23360.1); similar to Prefoldin [Medicago truncatula] (GB:ABE82280.1); contains InterPro domain Protein of unknown function DUF869, plant; (InterPro:IPR008587)	-0.60896	0.655669	5.8077	56.0134	-5.2112	0.000496883	0.00457621
246247_at	1347	AT4G36640	SEC14 cytosolic factor family protein / phosphoglyceride transfer family protein	-0.609039	0.655633	7.39377	168.169	-7.82061	2.17306e-05	0.000428316
256832_at	11932	AT3G22880	ATDMC1 (RECA-LIKE GENE); ATP binding / DNA-dependent ATPase/ damaged DNA binding	-0.609419	0.65546	8.61369	391.724	-7.37871	3.48751e-05	0.000618586
257314_at	12414	AT3G26590	MATE efflux family protein	-0.609649	0.655356	7.48367	178.981	-8.04253	1.72662e-05	0.00036232
261187_at	16287	AT1G32860	glycosyl hydrolase family 17 protein	-0.610261	0.655078	7.12738	139.815	-8.91109	7.34342e-06	0.00019591
247252_at	2352	AT5G64770	similar to 80C09_10 [Brassica rapa subsp. pekinensis] (GB:AAZ41821.1)	-0.610701	0.654878	5.05363	33.212	-6.68152	7.68648e-05	0.00111038
255856_at	10956	AT1G66940	protein kinase-related	-0.610739	0.654861	9.32224	640.138	-7.65978	2.5752e-05	0.000492787
261072_at	16172	AT1G07340	ATSTP2 (SUGAR TRANSPORTER 2); carbohydrate transporter/ sugar porter	-0.612918	0.653873	7.6519	201.118	-3.36899	0.0078751	0.037825
253065_at	8165	AT4G37740	GRF2 (GROWTH REGULATING FACTOR 2)	-0.613053	0.653812	7.47889	178.39	-8.82205	7.99095e-06	0.000205726
266908_at	22008	AT2G34650	PID (PINOID); kinase	-0.614074	0.653349	8.66831	406.837	-8.4815	1.11116e-05	0.000260241
263496_at	18596	AT2G42570	similar to unknown protein [Arabidopsis thaliana] (TAIR:AT2G31110.2); similar to unknown [Pisum sativum] (GB:ABA29158.1); contains InterPro domain Protein of unknown function DUF231, plant; (InterPro:IPR004253)	-0.614565	0.653127	9.6287	791.638	-9.91997	2.94957e-06	0.000102093
260565_at	15665	AT2G43800	formin homology 2 domain-containing protein / FH2 domain-containing protein	-0.61478	0.653029	9.84123	917.287	-10.143	2.43646e-06	8.92063e-05
257740_at	12840	AT3G27330	zinc finger (C3HC4-type RING finger) family protein	-0.615188	0.652845	7.02854	130.557	-7.65241	2.59548e-05	0.000494594
267112_at	22212	AT2G14750	APK1 (APS KINASE1); ATP binding / kinase/ transferase, transferring phosphorus-containing groups	-0.616642	0.652187	8.9064	479.837	-8.41013	1.19223e-05	0.000273314
253175_at	8275	AT4G35050	MSI3 (NUCLEOSOME/CHROMATIN ASSEMBLY FACTOR GROUP C 3)	-0.617078	0.65199	8.42918	344.697	-6.85653	6.27e-05	0.000957288
256017_at	11117	AT1G19180	similar to unknown protein [Arabidopsis thaliana] (TAIR:AT1G74950.1); similar to PnFL-2 [Ipomoea nil] (GB:AAG49896.1); contains InterPro domain ZIM; (InterPro:IPR010399)	-0.617573	0.651766	8.98348	506.172	-6.37544	0.000110746	0.0014721
260941_at	16041	AT1G44970	peroxidase, putative	-0.618291	0.651442	10.2384	1208.02	-4.54581	0.00127625	0.00933948
260494_at	15594	AT2G41820	leucine-rich repeat transmembrane protein kinase, putative	-0.618298	0.651439	8.24071	302.483	-9.01682	6.64813e-06	0.000183492
251964_at	7064	AT3G53370	DNA-binding S1FA family protein	-0.618683	0.651265	7.88005	235.577	-7.32674	3.69211e-05	0.000643861
262463_at	17563	AT1G50310	monosaccharide transporter (STP9)	-0.619093	0.65108	8.30354	315.946	-4.53731	0.00129226	0.00943248
263073_at	18173	AT2G17500	auxin efflux carrier family protein	-0.619286	0.650993	6.33367	80.6537	-9.24236	5.39405e-06	0.000157539
261137_at	16237	AT1G19830	auxin-responsive protein, putative	-0.620184	0.650588	7.30399	158.023	-6.48824	9.66697e-05	0.00132833
257959_at	13059	AT3G25560	NIK2 (NSP-INTERACTING KINASE 2); protein kinase	-0.620303	0.650534	7.64222	199.774	-6.80369	6.66513e-05	0.00100351
262396_at	17496	AT1G49470	similar to unknown protein [Arabidopsis thaliana] (TAIR:AT1G55230.1); similar to Os08g0462900 [Oryza sativa (japonica cultivar-group)] (GB:NP_001061988.1); similar to Os09g0444900 [Oryza sativa (japonica cultivar-group)] (GB:NP_001063301.1); similar to plant viral-response family protein-like [Oryza sativa (japonica cultivar-group)] (GB:BAD38318.1); contains InterPro domain Protein of unknown fun…	-0.622074	0.649736	7.58647	192.201	-8.08473	1.65366e-05	0.000351211
261804_at	16904	AT1G30530	UDP-glucoronosyl/UDP-glucosyl transferase family protein	-0.622205	0.649677	10.3634	1317.36	-9.00076	6.74892e-06	0.000185202
250515_at	5615	AT5G09570	similar to unknown protein [Arabidopsis thaliana] (TAIR:AT5G64400.1); similar to Os03g0685500 [Oryza sativa (japonica cultivar-group)] (GB:NP_001050926.1); similar to unknown [Hyacinthus orientalis] (GB:AAS21010.1); contains InterPro domain CHCH; (InterPro:IPR010625)	-0.623736	0.648988	8.15416	284.87	-6.16472	0.000143381	0.00181293
263382_at	18482	AT2G40230	transferase family protein	-0.624035	0.648854	7.21076	148.135	-7.03826	5.09424e-05	0.00082178
256359_at	11459	AT1G66460	protein kinase family protein	-0.624127	0.648812	5.27347	38.6786	-4.68548	0.00104145	0.00800656
259180_at	14280	AT3G01680	similar to unknown protein [Arabidopsis thaliana] (TAIR:AT3G01670.1); similar to conserved hypothetical protein [Medicago truncatula] (GB:ABD32254.1); contains domain NUCLEOREDOXIN (PTHR13871:SF2); contains domain THIOREDOXIN (PTHR13871)	-0.624184	0.648787	8.96436	499.508	-6.99357	5.35921e-05	0.000852465
255642_at	10742	AT4G00820	IQD17 (IQ-domain 17); calmodulin binding	-0.624715	0.648548	7.87707	235.091	-8.07204	1.67524e-05	0.000353817
255644_at	10744	AT4G00870	basic helix-loop-helix (bHLH) family protein	-0.625128	0.648362	7.94382	246.223	-7.73909	2.36758e-05	0.000458831
250051_at	5151	AT5G17800	MYB56 (myb domain protein 56); DNA binding / transcription factor	-0.625181	0.648338	6.34946	81.5416	-6.60221	8.43993e-05	0.00119574
266262_at	21362	AT2G27590	similar to conserved hypothetical protein [Medicago truncatula] (GB:ABE93200.1); contains domain no description (G3D.3.40.50.150); contains domain S-adenosyl-L-methionine-dependent methyltransferases (SSF53335)	-0.625303	0.648284	8.0751	269.679	-8.96989	6.94739e-06	0.000188431
252161_at	7261	AT3G50580	histamine receptor	-0.62536	0.648258	6.48452	89.5434	-4.95534	0.000708761	0.00601221
257402_at	12502	AT1G23570	similar to unknown protein [Arabidopsis thaliana] (TAIR:AT1G23580.1); similar to OBP32pep (GB:AAA79703.1); contains InterPro domain Protein of unknown function DUF220; (InterPro:IPR003863)	-0.625361	0.648258	9.12524	558.432	-9.2076	5.56914e-06	0.0001609
250639_at	5739	AT5G07560	GRP20 (Glycine rich protein 20); nutrient reservoir	-0.625785	0.648067	12.582	6131.26	-8.07796	1.66514e-05	0.000352663
257739_at	12839	AT3G27470	similar to unknown protein [Arabidopsis thaliana] (TAIR:AT1G67850.2); similar to Protein of unknown function DUF707 [Medicago truncatula] (GB:ABE91787.1); contains InterPro domain Protein of unknown function DUF707; (InterPro:IPR007877)	-0.627073	0.647489	6.7063	104.423	-6.5176	9.33339e-05	0.00129184
248839_at	3939	AT5G46690	BHLH071 (BETA HLH PROTEIN 71); DNA binding / transcription factor	-0.627436	0.647326	7.38241	166.85	-6.32535	0.000117698	0.00155005
263002_at	18102	AT1G54200	similar to unknown protein [Arabidopsis thaliana] (TAIR:AT3G13980.1); similar to Os03g0175800 [Oryza sativa (japonica cultivar-group)] (GB:NP_001049135.1); similar to PREDICTED: hypothetical protein [Rattus norve (GB:XP_001071968.1); contains domain Tautomerase/MIF (SSF55331)	-0.629233	0.64652	6.15345	71.1825	-6.24912	0.000129202	0.0016688
261318_at	16418	AT1G53035	similar to unknown protein [Arabidopsis thaliana] (TAIR:AT3G15358.1); similar to unknown [Musa acuminata] (GB:ABC41688.1)	-0.629498	0.646401	7.40723	169.746	-5.99392	0.000177517	0.00212443
267006_at	22106	AT2G34190	xanthine/uracil permease family protein	-0.629511	0.646395	8.17006	288.026	-9.27167	5.25113e-06	0.000154752
252077_at	7177	AT3G51720	similar to unknown protein [Arabidopsis thaliana] (TAIR:AT2G38370.1); similar to putative myosin heavy chain [Dendrobium grex Madame Thong-In] (GB:AAD20814.1); similar to Os07g0677900 [Oryza sativa (japonica cultivar-group)] (GB:NP_001060633.1); similar to Os03g0339700 [Oryza sativa (japonica cultivar-group)] (GB:NP_001050061.1); contains InterPro domain Protein of unknown function DUF827, plant;…	-0.630625	0.645897	8.81299	449.754	-10.8757	1.33236e-06	5.69123e-05
265400_at	20500	AT2G10940	protease inhibitor/seed storage/lipid transfer protein (LTP) family protein	-0.632043	0.645262	12.9639	7989.49	-3.87833	0.00350379	0.0203001
256354_at	11454	AT1G54870	oxidoreductase	-0.634523	0.644154	5.31431	39.7894	-5.12448	0.000559861	0.0049904
265205_at	20305	AT2G36660	PAB7 (POLY(A) BINDING PROTEIN 7); RNA binding / translation initiation factor	-0.636302	0.64336	7.22462	149.564	-8.04131	1.72878e-05	0.000362441
259858_at	14958	AT1G68400	leucine-rich repeat transmembrane protein kinase, putative	-0.636541	0.643253	8.28892	312.761	-4.92613	0.000738538	0.00619568
256125_at	11225	AT1G18250	ATLP-1 (Arabidopsis thaumatin-like protein 1)	-0.636606	0.643225	10.6414	1597.24	-9.36819	4.809e-06	0.000145648
266612_at	21712	AT2G14860	peroxisomal membrane protein 22 kDa, putative	-0.636635	0.643211	5.8361	57.1268	-6.72331	7.31911e-05	0.00107432
255422_at	10522	AT4G03270	CYCD6;1 (CYCLIN D6;1); cyclin-dependent protein kinase	-0.636924	0.643083	5.65746	50.4736	-9.18328	5.69533e-06	0.000162999
262434_at	17534	AT1G47670	amino acid transporter family protein	-0.639282	0.642032	8.60445	389.221	-10.4569	1.87298e-06	7.37946e-05
251372_at	6472	AT3G60520	zinc ion binding	-0.640058	0.641687	7.24388	151.574	-5.06525	0.000607774	0.00532566
251025_at	6125	AT5G02190	PCS1 (PROMOTION OF CELL SURVIVAL1); aspartic-type endopeptidase/ peptidase	-0.640602	0.641445	8.75158	431.01	-9.77602	3.34328e-06	0.000110991
248245_at	3345	AT5G53190	nodulin MtN3 family protein	-0.641034	0.641253	8.94165	491.707	-4.7191	0.000992115	0.00774474
267064_at	22164	AT2G41110	ATCAL4 (calmodulin-related protein 4); calcium ion binding	-0.641549	0.641024	9.31387	636.434	-8.72093	8.80327e-06	0.000220729
265280_at	20380	AT2G28355	LCR5 (Low-molecular-weight cysteine-rich 5)	-0.642408	0.640643	6.768	108.986	-8.61819	9.72219e-06	0.00023718
263452_at	18552	AT2G22190	trehalose-phosphatase	-0.64249	0.640606	7.10319	137.491	-9.49545	4.28729e-06	0.000133597
249208_at	4308	AT5G42650	AOS (ALLENE OXIDE SYNTHASE); hydro-lyase/ oxygen binding	-0.643621	0.640104	6.75908	108.314	-9.17749	5.72582e-06	0.000163667
254066_at	9166	AT4G25480	DREB1A (DEHYDRATION RESPONSE ELEMENT B1A); DNA binding / transcription factor/ transcriptional activator	-0.643891	0.639985	6.11476	69.299	-5.33725	0.000418565	0.00402847
249383_at	4483	AT5G39860	PRE1 (PACLOBUTRAZOL RESISTANCE1); DNA binding / transcription factor	-0.644189	0.639852	6.8134	112.47	-5.74947	0.000242615	0.00268898
246274_at	1374	AT4G36620	GATA19; zinc finger (GATA type) family protein	-0.644829	0.639569	5.35651	40.9703	-9.75364	3.4095e-06	0.000112385
264010_at	19110	AT2G21100	disease resistance-responsive protein-related / dirigent protein-related	-0.646059	0.639024	5.17837	36.2114	-8.812	8.06786e-06	0.000207006
258742_at	13842	AT3G05800	AtBS1; bHLH transcription factor	-0.646163	0.638977	6.12369	69.7289	-6.48038	9.75844e-05	0.00133447
258392_at	13492	AT3G15400	ATA20 (Arabidopsis thaliana anther 20)	-0.646605	0.638782	13.5953	12376.3	-7.77304	2.28434e-05	0.000446494
257002_at	12102	AT3G14100	oligouridylate-binding protein, putative	-0.648853	0.637787	11.0252	2084.05	-9.51124	4.22703e-06	0.00013208
265305_at	20405	AT2G20340	tyrosine decarboxylase, putative	-0.648912	0.637761	9.16118	572.517	-8.2582	1.38725e-05	0.000306619
262154_at	17254	AT1G52700	phospholipase/carboxylesterase family protein	-0.64949	0.637506	7.0943	136.646	-6.79348	6.7446e-05	0.00101347
262120_at	17220	AT1G02950	ATGSTF4 (GLUTATHIONE S-TRANSFERASE 31); glutathione transferase	-0.650153	0.637213	6.69282	103.452	-8.48655	1.10566e-05	0.000259732
254109_at	9209	AT4G25240	SKS1 (SKU5 SIMILAR 1); copper ion binding	-0.651836	0.63647	7.73508	213.054	-7.01381	5.23736e-05	0.000840114
247345_at	2445	AT5G63760	IBR domain-containing protein	-0.652875	0.636012	7.26651	153.971	-9.39532	4.69218e-06	0.000143072
267465_at	22565	AT2G19170	SLP3 (Subtilisin-like serine protease 3); subtilase	-0.653101	0.635912	9.06097	534.101	-10.4008	1.96206e-06	7.62533e-05
265405_at	20505	AT2G16750	protein kinase family protein	-0.653541	0.635718	7.45504	175.465	-4.53364	0.00129924	0.00946829
253165_at	8265	AT4G35320	similar to unknown protein [Arabidopsis thaliana] (TAIR:AT2G17300.1); similar to Os02g0715300 [Oryza sativa (japonica cultivar-group)] (GB:NP_001047925.1); similar to Os08g0511400 [Oryza sativa (japonica cultivar-group)] (GB:NP_001062213.1); contains domain N-terminal domain of cbl (N-cbl) (SSF47668)	-0.654858	0.635138	7.7021	208.24	-9.33839	4.94098e-06	0.000148686
247638_at	2738	AT5G60490	FLA12 (fasciclin-like arabinogalactan-protein 12)	-0.656225	0.634537	7.62547	197.467	-9.83241	3.18257e-06	0.000107581
255082_at	10182	no_match	no_match	-0.656861	0.634257	6.18823	72.9195	-9.9834	2.79252e-06	9.8147e-05
262616_at	17716	AT1G06620	2-oxoglutarate-dependent dioxygenase, putative	-0.658255	0.633644	5.8522	57.7679	-5.3113	0.000433532	0.00413587
266118_at	21218	AT2G02130	LCR68/PDF2.3 (Low-molecular-weight cysteine-rich 68); protease inhibitor	-0.658802	0.633404	11.974	4022.72	-9.74884	3.4239e-06	0.00011265
258270_at	13370	AT3G15650	phospholipase/carboxylesterase family protein	-0.660222	0.632781	7.32848	160.728	-5.27461	0.000455681	0.00429685
266797_at	21897	AT2G22840	GRF1 (GROWTH-REGULATING FACTOR 1)	-0.661225	0.632341	7.61157	195.574	-8.08644	1.65077e-05	0.000350924
253804_at	8904	AT4G28230	unknown protein	-0.662292	0.631874	7.23339	150.476	-7.98675	1.82852e-05	0.000376771
248559_at	3659	AT5G50010	bHLH145; transcription factor/ transcription regulator	-0.662747	0.631674	6.58587	96.0603	-8.06501	1.68733e-05	0.000355712
251067_at	6167	AT5G01910	unknown protein	-0.663417	0.631381	6.69367	103.513	-9.1592	5.82337e-06	0.000165625
266391_at	21491	AT2G41290	strictosidine synthase family protein	-0.663424	0.631378	8.96218	498.753	-7.63737	2.6374e-05	0.000501744
267066_at	22166	AT2G41040	methyltransferase-related	-0.664185	0.631045	9.22464	598.266	-9.86128	3.10359e-06	0.000105504
265277_at	20377	AT2G28410	similar to unknown protein [Arabidopsis thaliana] (TAIR:AT5G60650.1)	-0.66553	0.630457	8.70177	416.385	-9.91588	2.96004e-06	0.000102301
247109_at	2209	AT5G65870	ATPSK5 (PHYTOSULFOKINE 5 PRECURSOR); growth factor	-0.666219	0.630156	8.07622	269.889	-3.52441	0.00613112	0.0312412
246885_at	1985	AT5G26230	similar to unknown protein [Arabidopsis thaliana] (TAIR:AT5G42750.1); similar to Os05g0390600 [Oryza sativa (japonica cultivar-group)] (GB:NP_001055441.1); similar to PREDICTED: hypothetical protein [Rattus norve (GB:XP_001078830.1)	-0.667132	0.629757	7.58702	192.275	-9.27446	5.23774e-06	0.000154557
251982_at	7082	AT3G53190	pectate lyase family protein	-0.667954	0.629399	10.835	1826.68	-10.4435	1.89382e-06	7.42234e-05
265024_at	20124	AT1G24600	similar to unknown protein [Arabidopsis thaliana] (TAIR:AT1G67920.1)	-0.66808	0.629344	9.01634	517.832	-7.65351	2.59244e-05	0.000494427
251605_at	6705	AT3G57830	leucine-rich repeat transmembrane protein kinase, putative	-0.668334	0.629233	8.33812	323.612	-8.72032	8.80847e-06	0.000220729
258483_at	13583	AT3G02570	MEE31 (maternal effect embryo arrest 31); mannose-6-phosphate isomerase	-0.668419	0.629196	9.92665	973.236	-10.164	2.39334e-06	8.81692e-05
247304_at	2404	AT5G63850	AAP4 (amino acid permease 4); amino acid permease	-0.669859	0.628568	8.50203	362.549	-7.36253	3.54986e-05	0.00062544
255295_at	10395	AT4G04760	sugar transporter family protein	-0.670221	0.628411	6.84813	115.21	-6.8392	6.3967e-05	0.000972076
261150_at	16250	AT1G19640	JMT (JASMONIC ACID CARBOXYL METHYLTRANSFERASE); jasmonate O-methyltransferase	-0.671399	0.627897	6.92894	121.848	-8.94649	7.1021e-06	0.000191262
264053_at	19153	AT2G22560	kinase interacting protein-related	-0.672656	0.627351	6.2729	77.3272	-9.0233	6.60793e-06	0.000182935
255604_at	10704	AT4G01080	similar to unknown protein [Arabidopsis thaliana] (TAIR:AT1G01430.1); similar to unknown protein Cr17 [Brassica napus] (GB:AAX51387.1); contains InterPro domain Protein of unknown function DUF231, plant; (InterPro:IPR004253)	-0.673067	0.627172	10.7584	1732.16	-10.1535	2.41481e-06	8.86987e-05
257193_at	12293	AT3G13160	pentatricopeptide (PPR) repeat-containing protein	-0.673553	0.626961	8.78716	441.773	-10.5756	1.69861e-06	6.91033e-05
264317_at	19417	AT1G70310	SPDS2 (SPERMIDINE SYNTHASE 2)	-0.674071	0.626736	10.2206	1193.16	-8.38742	1.21937e-05	0.000277307
250201_at	5301	AT5G14230	ankyrin repeat family protein	-0.675137	0.626273	6.87769	117.596	-7.59557	2.75788e-05	0.000519465
246344_at	1444	AT3G56730	similar to unknown protein [Arabidopsis thaliana] (TAIR:AT3G62050.1); similar to Os07g0637200 [Oryza sativa (japonica cultivar-group)] (GB:NP_001060400.1); contains InterPro domain Protein of unknown function DUF537; (InterPro:IPR007491)	-0.675802	0.625984	5.92759	60.867	-7.39061	3.44244e-05	0.000612198
248061_at	3161	AT5G55340	long-chain-alcohol O-fatty-acyltransferase family protein / wax synthase family protein	-0.676122	0.625845	6.10361	68.7652	-9.77399	3.34922e-06	0.000110991
259765_at	14865	AT1G64370	similar to hypothetical protein FG03565.1 [Gibberella zeae PH-1] (GB:XP_383741.1)	-0.678405	0.624856	8.80812	448.238	-8.52674	1.0629e-05	0.000251503
250558_at	5658	AT5G07990	TT7 (TRANSPARENT TESTA 7); flavonoid 3'-monooxygenase/ oxygen binding	-0.678815	0.624678	8.80988	448.784	-7.72085	2.41364e-05	0.000466568
252355_at	7455	AT3G48250	pentatricopeptide (PPR) repeat-containing protein	-0.679086	0.624561	7.1294	140.011	-7.39958	3.40886e-05	0.000608897
259852_at	14952	AT1G72280	AERO1 (ARABIDOPSIS ENDOPLASMIC RETICULUM OXIDOREDUCTINS 1)	-0.67948	0.62439	7.03818	131.433	-10.5947	1.67228e-06	6.83599e-05
256862_at	11962	AT3G23940	dehydratase family	-0.679946	0.624189	9.7665	870.98	-9.00018	6.75261e-06	0.000185202
253247_at	8347	AT4G34610	BLH6 (BELL1-LIKE HOMEODOMAIN 5); DNA binding / transcription factor	-0.681333	0.623589	6.52816	92.2938	-8.42118	1.17926e-05	0.000271761
250907_at	6007	AT5G03670	similar to unknown protein [Arabidopsis thaliana] (TAIR:AT2G36420.1); similar to OSIGBa0147H17.2 [Oryza sativa (indica cultivar-group)] (GB:CAH66954.1); similar to OSJNBa0019K04.3 [Oryza sativa (japonica cultivar-group)] (GB:CAD41656.3)	-0.682208	0.623211	7.07872	135.178	-9.20545	5.58018e-06	0.000160915
261840_at	16940	AT1G16070	TLP8 (TUBBY LIKE PROTEIN 8); transcription factor	-0.682319	0.623163	7.24034	151.202	-7.52126	2.98717e-05	0.000554413
261794_at	16894	AT1G16060	ADAP; AP2/ERF transcription factor family	-0.682598	0.623042	8.80134	446.137	-8.60825	9.81655e-06	0.000238462
258321_at	13421	AT3G22840	ELIP1 (EARLY LIGHT-INDUCABLE PROTEIN); chlorophyll binding	-0.682625	0.623031	9.05664	532.499	-7.48766	3.09763e-05	0.000566615
254574_at	9674	AT4G19430	unknown protein	-0.682733	0.622984	10.9685	2003.81	-7.4451	3.24395e-05	0.000586327
266362_at	21462	AT2G32430	galactosyltransferase family protein	-0.683159	0.6228	8.24195	302.742	-10.0952	2.53752e-06	9.15242e-05
251174_at	6274	AT3G63200	PLA IIIB/PLP9 (Patatin-like protein 9); nutrient reservoir	-0.683481	0.622661	8.42578	343.885	-8.38123	1.22689e-05	0.00027846
247478_at	2578	AT5G62360	invertase/pectin methylesterase inhibitor family protein	-0.683873	0.622492	10.5491	1498.25	-7.92056	1.95806e-05	0.000395835
250933_at	6033	AT5G03170	FLA11 (fasciclin-like arabinogalactan-protein 11)	-0.684141	0.622376	9.14263	565.204	-11.4304	8.63254e-07	4.18953e-05
267040_at	22140	AT2G34300	dehydration-responsive protein-related	-0.684359	0.622282	8.95416	495.989	-11.0875	1.12643e-06	5.09326e-05
258938_at	14038	AT3G10080	germin-like protein, putative	-0.684411	0.62226	9.55088	750.067	-7.07517	4.88607e-05	0.000794945
250269_at	5369	AT5G12970	C2 domain-containing protein	-0.684446	0.622245	6.63219	99.1943	-5.5755	0.000304523	0.00318778
250732_at	5832	AT5G06480	MD-2-related lipid recognition domain-containing protein / ML domain-containing protein	-0.684623	0.622169	6.74619	107.351	-9.75977	3.39122e-06	0.000112107
253218_at	8318	AT4G34980	SLP2 (subtilisin-like serine protease 2); subtilase	-0.684806	0.62209	11.579	3059.33	-10.3035	2.12795e-06	8.0229e-05
259845_at	14945	AT1G73590	PIN1 (PIN-FORMED 1); transporter	-0.686439	0.621386	8.2068	295.456	-7.11819	4.65515e-05	0.000765255
265185_at	20285	AT1G23670	similar to unknown protein [Arabidopsis thaliana] (TAIR:AT1G23600.2); similar to OBP32pep (GB:AAA79703.1); contains InterPro domain Protein of unknown function DUF220; (InterPro:IPR003863)	-0.687233	0.621044	8.26403	307.413	-10.9581	1.2477e-06	5.4417e-05
250437_at	5537	AT5G10430	AGP4 (ARABINOGALACTAN-PROTEIN 4)	-0.687918	0.620749	7.73097	212.449	-4.82446	0.00085308	0.00690272
257072_at	12172	AT3G14220	GDSL-motif lipase/hydrolase family protein	-0.688796	0.620371	9.05191	530.757	-11.0018	1.20517e-06	5.33785e-05
252005_at	7105	AT3G52810	ATPAP21/PAP21 (purple acid phosphatase 21); acid phosphatase/ protein serine/threonine phosphatase	-0.690224	0.619758	7.95136	247.514	-5.40803	0.000380508	0.00373606
253757_at	8857	AT4G28950	ARAC7/ATROP9/RAC7/ROP9 (rho-related protein from plants 9); GTP binding	-0.690587	0.619601	6.70646	104.435	-6.50589	9.46493e-05	0.00130471
251706_at	6806	AT3G56620	integral membrane family protein / nodulin MtN21-related	-0.691372	0.619265	6.93552	122.405	-5.31429	0.000431779	0.00412433
258769_at	13869	AT3G10870	hydrolase, alpha/beta fold family protein	-0.691567	0.619181	8.98098	505.295	-7.42085	3.33069e-05	0.000598684
261285_at	16385	AT1G35720	ANNAT1 (ANNEXIN ARABIDOPSIS 1); calcium ion binding / calcium-dependent phospholipid binding	-0.69176	0.619098	10.5439	1492.85	-9.28482	5.18833e-06	0.000153497
253191_at	8291	AT4G35350	XCP1 (XYLEM CYSTEINE PEPTIDASE 1); cysteine-type peptidase	-0.692312	0.618861	8.18831	291.694	-8.72403	8.77708e-06	0.00022049
259466_at	14566	AT1G19050	ARR7 (RESPONSE REGULATOR 7); transcription regulator/ two-component response regulator	-0.692416	0.618817	8.98033	505.065	-7.70313	2.45935e-05	0.000474199
265025_at	20125	AT1G24575	unknown protein	-0.692732	0.618681	9.10239	549.658	-5.74499	0.000244027	0.00269506
257793_at	12893	AT3G26960	similar to unknown protein [Arabidopsis thaliana] (TAIR:AT5G41050.1); similar to Os09g0508200 [Oryza sativa (japonica cultivar-group)] (GB:NP_001063620.1); similar to Os12g0472800 [Oryza sativa (japonica cultivar-group)] (GB:NP_001066754.1)	-0.693602	0.618308	8.06241	267.317	-8.54902	1.03999e-05	0.000247363
259346_at	14446	AT3G03910	glutamate dehydrogenase, putative	-0.694198	0.618053	8.02474	260.427	-9.1399	5.9283e-06	0.000167844
248963_at	4063	AT5G45700	NLI interacting factor (NIF) family protein	-0.694404	0.617964	8.20174	294.422	-6.14559	0.000146824	0.00184622
252502_at	7602	AT3G46900	COPT2 (Copper transporter 2); copper ion transporter	-0.696366	0.617125	5.83756	57.185	-5.57337	0.000305381	0.00319236
247178_at	2278	AT5G65205	short-chain dehydrogenase/reductase (SDR) family protein	-0.697857	0.616487	9.33856	647.42	-7.36996	3.52109e-05	0.000622123
250196_at	5296	AT5G14580	polyribonucleotide nucleotidyltransferase, putative	-0.6981	0.616384	6.18437	72.7245	-7.27015	3.92986e-05	0.000676019
246526_at	1626	AT5G15720	GLIP7 (GDSL-motif lipase 7); carboxylic ester hydrolase	-0.698371	0.616268	8.19262	292.566	-7.12414	4.62414e-05	0.000764253
248638_at	3738	AT5G49070	beta-ketoacyl-CoA synthase family protein	-0.698511	0.616208	6.0525	66.3719	-5.88571	0.000203644	0.00235435
254754_at	9854	AT4G13210	pectate lyase family protein	-0.699009	0.615995	6.55418	93.9735	-6.03184	0.00016924	0.00204972
252160_at	7260	AT3G50570	hydroxyproline-rich glycoprotein family protein	-0.699668	0.615714	7.61682	196.287	-8.60071	9.88883e-06	0.000239452
265355_at	20455	AT2G16760	similar to unknown protein [Arabidopsis thaliana] (TAIR:AT2G47370.1); similar to Os03g0307400 [Oryza sativa (japonica cultivar-group)] (GB:NP_001049896.1); similar to Os10g0443000 [Oryza sativa (japonica cultivar-group)] (GB:NP_001064702.1); similar to hypothetical protein LOC_Os10g30620 [Oryza sativa (japonica cultivar-group)] (GB:AAP53978.2); contains InterPro domain Soluble quinoprotein glucos…	-0.699874	0.615626	8.59711	387.247	-7.23266	4.09656e-05	0.000695865
253754_at	8854	AT4G29020	glycine-rich protein	-0.70099	0.61515	10.6222	1576.16	-6.72382	7.31477e-05	0.00107432
256299_at	11399	AT1G69530	ATEXPA1 (ARABIDOPSIS THALIANA EXPANSIN A1)	-0.70151	0.614928	9.58298	766.944	-11.5002	8.18492e-07	4.01501e-05
262312_at	17412	AT1G70830	Bet v I allergen family protein	-0.702183	0.614642	12.0164	4142.93	-11.0066	1.20064e-06	5.32814e-05
258516_at	13616	AT3G06490	MYB108 (BOTRYTIS-SUSCEPTIBLE1, myb domain protein 108); DNA binding / transcription factor	-0.703336	0.61415	5.30049	39.4101	-4.98558	0.000679292	0.00582286
253850_at	8950	AT4G28090	SKS10 (SKU5 Similar 10); copper ion binding / oxidoreductase	-0.703617	0.614031	7.69701	207.506	-11.9552	5.82249e-07	3.04895e-05
266418_at	21518	AT2G38750	ANNAT4 (ANNEXIN 4, ANNEXIN ARABIDOPSIS 4); calcium ion binding / calcium-dependent phospholipid binding	-0.703634	0.614023	8.30766	316.851	-8.88501	7.5269e-06	0.000198026
255104_at	10204	AT4G08685	SAH7	-0.704793	0.61353	11.5774	3055.97	-11.9339	5.91467e-07	3.06622e-05
245524_at	624	AT4G15920	nodulin MtN3 family protein	-0.705504	0.613228	8.90055	477.894	-9.0338	6.54338e-06	0.000181796
254232_at	9332	AT4G23600	CORI3 (CORONATINE INDUCED 1, JASMONIC ACID RESPONSIVE 2); transaminase	-0.705583	0.613195	11.6114	3128.87	-9.4238	4.57291e-06	0.000140944
255566_s_at	10666	AT4G01780;AT3G48670	[AT4G01780, XH/XS domain-containing protein];[AT3G48670, XH/XS domain-containing protein / XS zinc finger domain-containing protein]	-0.705688	0.61315	7.82621	226.947	-9.65905	3.70582e-06	0.000119561
253514_at	8614	AT4G31805	POLAR; WRKY family transcription factor	-0.705775	0.613113	6.59642	96.7652	-8.45429	1.14133e-05	0.000264571
263427_at	18527	AT2G22260	oxidoreductase, 2OG-Fe(II) oxygenase family protein	-0.7084	0.611999	6.29216	78.366	-7.74431	2.35455e-05	0.000457473
245322_at	422	AT4G14815	protease inhibitor/seed storage/lipid transfer protein (LTP) family protein	-0.708888	0.611791	9.86543	932.802	-6.80379	6.66436e-05	0.00100351
261653_at	16753	AT1G01900	subtilase family protein	-0.710348	0.611172	8.10773	275.848	-11.4955	8.21426e-07	4.02076e-05
252272_at	7372	AT3G49670	BAM2 (big apical meristem 2); ATP binding / protein serine/threonine kinase	-0.710457	0.611126	9.38468	668.453	-10.7144	1.51699e-06	6.36078e-05
258562_at	13662	AT3G05980	similar to unknown protein [Arabidopsis thaliana] (TAIR:AT5G19340.1)	-0.711696	0.610602	6.29515	78.5286	-7.01048	5.25723e-05	0.000842709
267497_at	22597	AT2G30540	glutaredoxin family protein	-0.713077	0.610018	8.79573	444.403	-7.81918	2.17632e-05	0.000428316
264962_at	20062	AT1G77110	PIN6 (PIN-FORMED 6); auxin:hydrogen symporter/ transporter	-0.71418	0.609552	7.69023	206.533	-9.61518	3.85273e-06	0.000123461
250180_at	5280	AT5G14450	GDSL-motif lipase/hydrolase family protein	-0.71455	0.609395	8.72115	422.016	-10.6894	1.54809e-06	6.45558e-05
258204_at	13304	AT3G13960	GRF5 (GROWTH-REGULATING FACTOR 5)	-0.714819	0.609282	7.53288	185.193	-6.81562	6.57359e-05	0.000991691
251560_at	6660	AT3G57920	squamosa promoter-binding protein-like 15 (SPL15)	-0.715769	0.608881	6.61601	98.0884	-8.05413	1.70622e-05	0.000358699
251733_at	6833	AT3G56240	CCH (COPPER CHAPERONE)	-0.718434	0.607757	11.7743	3502.82	-10.1625	2.39653e-06	8.81692e-05
267431_at	22531	AT2G34870	MEE26 (maternal effect embryo arrest 26)	-0.718628	0.607675	9.10778	551.716	-7.34923	3.602e-05	0.000633963
265096_at	20196	AT1G04030	similar to unknown protein [Arabidopsis thaliana] (TAIR:AT5G44040.1); similar to At1g04030 [Coffea canephora] (GB:ABD93477.2); similar to Os04g0511700 [Oryza sativa (japonica cultivar-group)] (GB:NP_001053294.1); similar to OSIGBa0157K09-H0214G12.18 [Oryza sativa (indica cultivar-group)] (GB:CAH68007.1)	-0.71977	0.607194	6.13617	70.3352	-10.0911	2.54644e-06	9.16156e-05
255517_at	10617	AT4G02290	glycosyl hydrolase family 9 protein	-0.719948	0.607119	11.4651	2827.17	-10.9085	1.29787e-06	5.58574e-05
264610_at	19710	AT1G04645	self-incompatibility protein-related	-0.720927	0.606708	5.68668	51.5065	-4.37605	0.00164023	0.0113406
254104_at	9204	AT4G25040	integral membrane family protein	-0.721365	0.606523	8.34279	324.661	-4.12144	0.00240809	0.0152877
265656_at	20756	AT2G13820	protease inhibitor/seed storage/lipid transfer protein (LTP) family protein	-0.721464	0.606482	8.67889	409.833	-8.47542	1.11783e-05	0.000260712
259857_at	14957	AT1G68430	similar to unknown protein [Arabidopsis thaliana] (TAIR:AT1G66890.1)	-0.722431	0.606075	5.95303	61.9501	-9.4453	4.48508e-06	0.000138624
250154_at	5254	AT5G15140	aldose 1-epimerase family protein	-0.723663	0.605558	7.07826	135.136	-5.91799	0.000195438	0.00228261
260241_at	15341	AT1G63710	CYP86A7 (cytochrome P450, family 86, subfamily A, polypeptide 7); oxygen binding	-0.724599	0.605165	10.3832	1335.56	-7.34452	3.62066e-05	0.000635448
250239_at	5339	AT5G13580	ABC transporter family protein	-0.725393	0.604832	5.19852	36.7206	-3.9733	0.00302344	0.0181725
267639_at	22739	AT2G42200	squamosa promoter-binding protein-like 9 (SPL9)	-0.726464	0.604384	9.54067	744.781	-9.35488	4.86744e-06	0.00014686
252827_at	7927	AT4G39950	CYP79B2 (cytochrome P450, family 79, subfamily B, polypeptide 2); oxygen binding	-0.727008	0.604155	7.69287	206.912	-5.28526	0.000449125	0.00424885
263477_at	18577	AT2G31790	UGT74C1; UDP-glucoronosyl/UDP-glucosyl transferase family protein	-0.727652	0.603886	9.20188	588.901	-10.7463	1.47836e-06	6.26791e-05
251012_at	6112	AT5G02580	similar to unknown protein [Arabidopsis thaliana] (TAIR:AT3G55240.1); similar to Os03g0280400 [Oryza sativa (japonica cultivar-group)] (GB:NP_001049737.1); similar to Os05g0462000 [Oryza sativa (japonica cultivar-group)] (GB:NP_001055765.1); similar to Os01g0837600 [Oryza sativa (japonica cultivar-group)] (GB:NP_001044739.1); contains InterPro domain Conserved hypothetical protein 1589, plant; (I…	-0.729647	0.603052	6.8395	114.524	-7.92289	1.95332e-05	0.000395343
266673_at	21773	AT2G29630	thiamine biosynthesis family protein / thiC family protein	-0.731197	0.602404	11.1587	2286.11	-7.3717	3.51437e-05	0.000622062
250344_at	5444	AT5G11930	glutaredoxin family protein	-0.733248	0.601548	5.8353	57.0952	-5.18793	0.000513001	0.00469188
249048_at	4148	AT5G44300	dormancy/auxin associated family protein	-0.734039	0.601218	6.68876	103.161	-7.16609	4.41192e-05	0.000734569
261712_at	16812	AT1G32780	alcohol dehydrogenase, putative	-0.734608	0.600982	7.91616	241.547	-8.28192	1.35463e-05	0.000301749
265058_s_at	20158	AT1G52030;AT1G52040	[AT1G52030, MBP2 (MYROSINASE-BINDING PROTEIN 2)];[AT1G52040, MBP1 (MYROSINASE-BINDING PROTEIN 1)]	-0.735457	0.600628	11.9944	4080.25	-8.06343	1.69007e-05	0.000355959
252363_at	7463	AT3G48460	GDSL-motif lipase/hydrolase family protein	-0.735621	0.60056	10.3424	1298.28	-6.60162	8.44582e-05	0.00119584
257491_at	12591	AT1G06170	BHLH089; basic helix-loop-helix (bHLH) family protein	-0.735906	0.600441	6.56613	94.7549	-7.01639	5.22206e-05	0.000838248
261772_at	16872	AT1G76240	similar to unknown protein [Arabidopsis thaliana] (TAIR:AT2G17080.1); similar to Os06g0725700 [Oryza sativa (japonica cultivar-group)] (GB:NP_001058624.1); similar to Os06g0725500 [Oryza sativa (japonica cultivar-group)] (GB:NP_001058623.1); similar to hypothetical protein [Oryza sativa (japonica cultivar-group)] (GB:BAD61705.1); contains InterPro domain Protein of unknown function DUF241, plant;…	-0.736587	0.600158	7.05005	132.518	-7.10066	4.74778e-05	0.000774656
247451_at	2551	AT5G62320	MYB99 (myb domain protein 99); DNA binding / transcription factor	-0.738326	0.599435	7.23564	150.711	-5.9213	0.000194618	0.0022742
263544_at	18644	AT2G21590	APL4 (large subunit of AGP 4); glucose-1-phosphate adenylyltransferase	-0.73836	0.59942	6.95241	123.846	-5.38801	0.000390881	0.00381842
259001_at	14101	AT3G01960	unknown protein	-0.739194	0.599074	4.78376	27.5459	-6.18272	0.000140221	0.00177889
264054_at	19154	AT2G22540	SVP (SHORT VEGETATIVE PHASE); transcription factor	-0.740738	0.598433	5.98863	63.4975	-8.34623	1.27033e-05	0.000287178
259972_at	15072	AT1G76420	CUC3 (CUP SHAPED COTYLEDON3); transcription factor	-0.741672	0.598046	5.89267	59.4114	-8.26991	1.37104e-05	0.000304513
267261_at	22361	AT2G23120	similar to unknown protein [Arabidopsis thaliana] (TAIR:AT2G23110.1); similar to PvLEA-18 [Phaseolus vulgaris] (GB:AAC49859.1); similar to hypothetical protein MtrDRAFT_AC144765g23v1 [Medicago truncatula] (GB:ABE87033.1); similar to LEA-18 [Phaseolus vulgaris] (GB:AAF81194.1)	-0.743505	0.597287	10.3339	1290.69	-8.11266	1.60723e-05	0.000342946
266223_at	21323	AT2G28790	osmotin-like protein, putative	-0.74479	0.596755	12.5851	6144.61	-10.3079	2.12026e-06	8.0229e-05
263373_at	18473	AT2G20515	similar to Os04g0517000 [Oryza sativa (japonica cultivar-group)] (GB:NP_001053317.1); similar to OSJNBa0073E02.5 [Oryza sativa (japonica cultivar-group)] (GB:CAE05445.2); similar to OSIGBa0145M07.3 [Oryza sativa (indica cultivar-group)] (GB:CAH67221.1)	-0.74628	0.596139	8.00916	257.631	-8.67645	9.18892e-06	0.000227825
265176_at	20276	AT1G23520	similar to unknown protein [Arabidopsis thaliana] (TAIR:AT1G23600.1); similar to OBP32pep (GB:AAA79703.1); contains InterPro domain Protein of unknown function DUF220; (InterPro:IPR003863)	-0.746516	0.596041	7.717	210.402	-7.2161	4.17264e-05	0.000703978
262637_at	17737	AT1G06640	2-oxoglutarate-dependent dioxygenase, putative	-0.746778	0.595933	7.36408	164.744	-9.09172	6.19939e-06	0.000173507
259789_at	14889	AT1G29395	COR414-TM1 (cold regulated 414 thylakoid membrane 1)	-0.747203	0.595757	10.0362	1050.02	-8.13182	1.5762e-05	0.000338222
265186_at	20286	AT1G23560	similar to unknown protein [Arabidopsis thaliana] (TAIR:AT1G70480.2); similar to OBP32pep (GB:AAA79703.1); contains InterPro domain Protein of unknown function DUF220; (InterPro:IPR003863)	-0.747656	0.59557	6.35501	81.8556	-8.72421	8.77553e-06	0.00022049
258237_at	13337	AT3G27810	MYB21 (MYB DOMAIN PROTEIN 21); DNA binding / transcription factor	-0.74828	0.595313	6.68198	102.677	-6.03442	0.000168694	0.00204567
253934_at	9034	AT4G26830	hydrolase, hydrolyzing O-glycosyl compounds	-0.74956	0.594785	6.06016	66.7251	-10.5749	1.69956e-06	6.91033e-05
259429_at	14529	AT1G01600	CYP86A4 (cytochrome P450, family 86, subfamily A, polypeptide 4); oxygen binding	-0.749588	0.594773	10.6931	1655.57	-7.34632	3.61353e-05	0.000635013
248509_at	3609	AT5G50335	unknown protein	-0.750708	0.594312	8.47348	355.445	-5.53189	0.000322591	0.00332353
247425_at	2525	AT5G62550	similar to unknown protein [Arabidopsis thaliana] (TAIR:AT3G28770.1); similar to unnamed protein product; gene_id:K19B1.16 unknown protein-related [Medicago truncatula] (GB:ABE84483.1)	-0.750891	0.594236	8.20853	295.81	-10.1388	2.44513e-06	8.92233e-05
249167_at	4267	AT5G42860	similar to unknown protein [Arabidopsis thaliana] (TAIR:AT1G45688.1); similar to H0814G11.12 [Oryza sativa (indica cultivar-group)] (GB:CAJ86345.1); similar to CAA30379.1 protein [Oryza sativa] (GB:CAB53482.1)	-0.753984	0.592964	6.33682	80.8302	-10.1009	2.52533e-06	9.12879e-05
246419_at	1519	AT5G17030	UDP-glucoronosyl/UDP-glucosyl transferase family protein	-0.755036	0.592531	5.58302	47.9355	-11.8164	6.45212e-07	3.26844e-05
266738_at	21838	AT2G47010	similar to unknown protein [Arabidopsis thaliana] (TAIR:AT1G17030.1); similar to hypothetical protein MtrDRAFT_AC136840g22v1 [Medicago truncatula] (GB:ABE82418.1)	-0.755183	0.592471	8.4021	338.285	-7.59164	2.76951e-05	0.000521225
250499_at	5599	AT5G09730	BXL3 (BETA-XYLOSIDASE 3); hydrolase, hydrolyzing O-glycosyl compounds	-0.75526	0.592439	9.85458	925.815	-7.97172	1.85709e-05	0.000381623
251778_at	6878	AT3G55660	ATROPGEF6/ROPGEF6 (KINASE PARTNER PROTEIN-LIKE); Rho guanyl-nucleotide exchange factor	-0.75604	0.592119	6.89537	119.046	-5.86593	0.000208854	0.00239823
252872_at	7972	AT4G40010	SNRK2-7/SNRK2.7/SRK2F (SNF1-RELATED PROTEIN KINASE 2-7, SNF1-RELATED PROTEIN KINASE 2.7); kinase	-0.756341	0.591996	6.96534	124.962	-9.98779	2.78199e-06	9.79278e-05
263320_at	18420	AT2G47180	ATGOLS1 (ARABIDOPSIS THALIANA GALACTINOL SYNTHASE 1); transferase, transferring hexosyl groups	-0.756666	0.591862	7.78487	220.536	-8.77846	8.33061e-06	0.000211745
252025_at	7125	AT3G52900	similar to unknown protein [Arabidopsis thaliana] (TAIR:AT2G36355.1); similar to hypothetical protein [Ipomoea trifida] (GB:AAS79606.1); contains InterPro domain Prefoldin; (InterPro:IPR009053); contains InterPro domain Protein of unknown function DUF662; (InterPro:IPR007033)	-0.759415	0.590736	6.70148	104.075	-9.54535	4.09997e-06	0.000129709
250661_at	5761	AT5G07030	pepsin A	-0.760131	0.590443	11.9788	4036.12	-11.1723	1.054e-06	4.82765e-05
258470_at	13570	AT3G06035	Identical to Putative GPI-anchored protein At3g06035 precursor [Arabidopsis Thaliana] (GB:Q84MC0;GB:Q8H7F7;GB:Q8L9J0); similar to unknown protein [Arabidopsis thaliana] (TAIR:AT5G19250.1); similar to Os07g0645000 [Oryza sativa (japonica cultivar-group)] (GB:NP_001060451.1); similar to unknown protein [Oryza sativa (japonica cultivar-group)] (GB:BAC07018.1); contains domain PR-1-like (SSF55797)	-0.761584	0.589848	10.0901	1089.98	-9.69948	3.57583e-06	0.000116355
265042_at	20142	AT1G04040	acid phosphatase class B family protein	-0.762165	0.589611	8.87586	469.786	-8.99079	6.81233e-06	0.000185945
264160_at	19260	AT1G65450	transferase family protein	-0.764224	0.58877	9.71735	841.812	-7.76177	2.31162e-05	0.000451044
260791_at	15891	AT1G06250	lipase class 3 family protein	-0.765532	0.588236	7.03712	131.337	-8.33545	1.28406e-05	0.000289994
264039_at	19139	AT2G03740	late embryogenesis abundant domain-containing protein / LEA domain-containing protein	-0.765633	0.588195	10.3713	1324.55	-8.56624	1.02265e-05	0.000244514
264882_at	19982	AT1G61110	ANAC025 (Arabidopsis NAC domain containing protein 25); transcription factor	-0.765966	0.58806	9.84429	919.233	-8.00256	1.79899e-05	0.000373014
253406_at	8506	AT4G32890	GATA9; zinc finger (GATA type) family protein	-0.766839	0.587704	6.4652	88.3525	-6.82981	6.46653e-05	0.000978777
258003_at	13103	AT3G29030	ATEXPA5 (ARABIDOPSIS THALIANA EXPANSIN A5)	-0.76785	0.587292	9.54632	747.7	-6.21487	0.000134764	0.00172404
257035_at	12135	AT3G19270	CYP707A4 (cytochrome P450, family 707, subfamily A, polypeptide 4); oxygen binding	-0.768059	0.587207	6.19296	73.1589	-7.91616	1.967e-05	0.000396705
247182_at	2282	AT5G65410	ATHB25/ZFHD2 (ZINC FINGER HOMEODOMAIN 2); DNA binding / transcription factor	-0.771244	0.585912	9.50224	725.203	-7.61716	2.69494e-05	0.000509292
253815_at	8915	AT4G28250	ATEXPB3 (ARABIDOPSIS THALIANA EXPANSIN B3)	-0.773518	0.584989	9.82403	906.415	-12.1523	5.04175e-07	2.76448e-05
266319_s_at	21419	AT3G10280;AT2G46720	[AT3G10280, fatty acid elongase 3-ketoacyl-CoA synthase, putative];[AT2G46720, HIC (HIGH CARBON DIOXIDE); acyltransferase]	-0.773707	0.584912	10.3216	1279.7	-8.52429	1.06546e-05	0.000251586
249245_at	4345	AT5G42280	DC1 domain-containing protein	-0.77484	0.584453	5.49879	45.2168	-4.29227	0.00185926	0.0125162
264277_at	19377	AT1G60390	BURP domain-containing protein / polygalacturonase, putative	-0.779222	0.582681	7.92088	242.339	-8.78524	8.27671e-06	0.000210941
265331_at	20431	AT2G18420	Encodes a Gibberellin-regulated GASA/GAST/Snakin family protein	-0.779344	0.582632	7.80478	223.6	-12.4534	4.06259e-07	2.37685e-05
261897_at	16997	AT1G80950	phospholipid/glycerol acyltransferase family protein	-0.779379	0.582618	7.97604	251.783	-11.0836	1.12985e-06	5.09326e-05
264287_at	19387	AT1G61930	similar to unknown protein [Arabidopsis thaliana] (TAIR:AT1G11700.1); similar to Protein of unknown function DUF584 [Medicago truncatula] (GB:ABE80969.1); contains InterPro domain Protein of unknown function DUF584; (InterPro:IPR007608)	-0.780902	0.582003	6.97436	125.745	-11.1023	1.1134e-06	5.04905e-05
250149_at	5249	AT5G14700	cinnamoyl-CoA reductase-related	-0.781591	0.581725	8.07247	269.187	-12.2548	4.68202e-07	2.61139e-05
259381_s_at	14481	AT3G16410;AT3G16390;AT3G16400	[AT3G16410,AtNSP4; jacalin lectin family protein];[AT3G16400, ATMLP-470 (MYROSINASE-BINDING PROTEIN-LIKE PROTEIN-470)]	-0.781634	0.581707	8.49527	360.854	-9.33854	4.94028e-06	0.000148686
253581_at	8681	AT4G30660	hydrophobic protein, putative / low temperature and salt responsive protein, putative	-0.783281	0.581044	10.7375	1707.26	-8.14481	1.55554e-05	0.000334735
263913_at	19013	AT2G36570	leucine-rich repeat transmembrane protein kinase, putative	-0.784623	0.580504	6.96084	124.572	-8.25316	1.3943e-05	0.000307285
265552_at	20652	AT2G07560	AHA6 (ARABIDOPSIS H(+)-ATPASE 6); ATPase	-0.786168	0.579882	8.49983	361.997	-4.77115	0.00092062	0.00732195
256626_at	11726	AT3G20015	pepsin A	-0.786421	0.579781	8.48555	358.432	-12.7517	3.29503e-07	2.015e-05
254635_at	9735	AT4G18670	leucine-rich repeat family protein / extensin family protein	-0.786564	0.579723	6.67967	102.513	-3.67503	0.00482293	0.0260319
264163_at	19263	AT1G65445	transferase-related	-0.788457	0.578963	7.93274	244.339	-9.90079	2.99895e-06	0.000103328
255471_at	10571	AT4G03050	AOP3 (2-oxoglutarate?dependent dioxygenase 3); oxidoreductase, acting on paired donors, with incorporation or reduction of molecular oxygen, 2-oxoglutarate as one donor, and incorporation of one atom each of oxygen into both donors	-0.790356	0.578201	10.4962	1444.32	-11.4628	8.42163e-07	4.10205e-05
250366_at	5466	AT5G11420	similar to unknown protein [Arabidopsis thaliana] (TAIR:AT5G25460.1); similar to unknown [Ricinus communis] (GB:CAB02653.1); contains InterPro domain Galactose-binding like; (InterPro:IPR008979); contains InterPro domain Protein of unknown function DUF642; (InterPro:IPR006946)	-0.790751	0.578043	9.46217	705.335	-5.64946	0.000276336	0.00296343
247643_at	2743	AT5G60450	ARF4 (AUXIN RESPONSE FACTOR 4); transcription factor	-0.790766	0.578037	7.59901	193.879	-10.2597	2.20774e-06	8.26906e-05
264260_at	19360	AT1G09210	calreticulin 2 (CRT2)	-0.791298	0.577824	11.688	3299.35	-11.4608	8.43429e-07	4.10205e-05
260041_at	15141	AT1G68780	leucine-rich repeat family protein	-0.793619	0.576895	8.36723	330.208	-11.1608	1.06347e-06	4.86127e-05
267123_at	22223	AT2G23560	hydrolase, alpha/beta fold family protein	-0.794297	0.576624	5.97717	62.9952	-9.67339	3.65914e-06	0.000118433
262369_at	17469	AT1G73010	phosphoric monoester hydrolase	-0.795607	0.576101	6.7027	104.163	-8.12464	1.58775e-05	0.000339107
246468_at	1568	AT5G17050	UDP-glucoronosyl/UDP-glucosyl transferase family protein	-0.796414	0.575779	8.57957	382.568	-9.21753	5.51847e-06	0.000160334
249214_at	4314	AT5G42720	glycosyl hydrolase family 17 protein	-0.796944	0.575567	7.48833	179.561	-10.2372	2.24993e-06	8.38576e-05
260932_s_at	16032	AT1G02530;AT1G02520	[AT1G02530, PGP12 (P-GLYCOPROTEIN 12); ATPase, coupled to transmembrane movement of substances];[AT1G02520, PGP11 (P-GLYCOPROTEIN 11); ATPase, coupled to transmembrane movement of substances]	-0.796946	0.575566	5.79446	55.5019	-7.81981	2.17489e-05	0.000428316
263438_at	18538	AT2G28660	copper-binding family protein	-0.797102	0.575504	7.18027	145.036	-5.05415	0.000617231	0.00539633
253863_at	8963	AT4G27420	ABC transporter family protein	-0.797415	0.575379	7.02844	130.548	-6.38169	0.00010991	0.00146355
258109_at	13209	AT3G23640	HGL1 (HETEROGLYCAN GLUCOSIDASE 1); hydrolase, hydrolyzing O-glycosyl compounds	-0.801133	0.573898	8.64706	400.888	-11.4043	8.80758e-07	4.24738e-05
247463_at	2563	AT5G62210	embryo-specific protein-related	-0.803165	0.573091	11.0753	2157.74	-7.89451	2.01176e-05	0.000403591
252365_at	7465	AT3G48350	cysteine proteinase, putative	-0.80406	0.572735	6.53511	92.7392	-8.2883	1.34599e-05	0.000300412
251013_at	6113	AT5G02540	short-chain dehydrogenase/reductase (SDR) family protein	-0.808411	0.571011	7.97483	251.572	-7.23255	4.09709e-05	0.000695865
261368_at	16468	AT1G53070	legume lectin family protein	-0.813241	0.569102	9.53151	740.066	-8.07278	1.67398e-05	0.000353817
266353_at	21453	AT2G01520	major latex protein-related / MLP-related	-0.813763	0.568896	9.7842	881.731	-9.92807	2.92898e-06	0.00010169
259640_at	14740	AT1G52400	BGL1 (BETA-GLUCOSIDASE HOMOLOG 1); hydrolase, hydrolyzing O-glycosyl compounds	-0.814014	0.568797	12.1702	4609.02	-10.5636	1.71543e-06	6.93777e-05
246786_at	1886	AT5G27410	aminotransferase class IV family protein	-0.81688	0.567668	6.68623	102.981	-10.7114	1.52068e-06	6.36452e-05
262683_at	17783	AT1G75920	family II extracellular lipase 5 (EXL5)	-0.817273	0.567514	9.75282	862.764	-11.085	1.12861e-06	5.09326e-05
246814_at	1914	AT5G27200	ACP5 (ACYL CARRIER PROTEIN 5); acyl carrier	-0.817306	0.567501	7.18071	145.081	-12.4328	4.12242e-07	2.39878e-05
247549_at	2649	AT5G61420	MYB28 (myb domain protein 28); DNA binding / transcription factor	-0.817898	0.567268	9.1074	551.569	-11.3967	8.85898e-07	4.26315e-05
262912_at	18012	AT1G59740	proton-dependent oligopeptide transport (POT) family protein	-0.81881	0.566909	8.86009	464.679	-12.9383	2.89699e-07	1.83048e-05
263092_at	18192	AT2G16210	REM24; transcriptional factor B3 family protein	-0.820264	0.566338	7.60065	194.099	-5.26229	0.000463392	0.00434799
253800_at	8900	AT4G28160	hydroxyproline-rich glycoprotein family protein	-0.821023	0.56604	6.61422	97.9668	-9.83205	3.18356e-06	0.000107581
249709_at	4809	AT5G35670	IQD33 (IQ-domain 33); calmodulin binding	-0.821165	0.565985	7.75028	215.311	-9.13216	5.97095e-06	0.00016877
259905_s_at	15005	AT1G74140;AT1G74130	[AT1G74140, similar to rhomboid family protein [Arabidopsis thaliana] (TAIR:AT1G74130.1); similar to Integral membrane protease of the rhomboid family involved in different forms of regulated intramembrane proteolysis (ISS) [Ostreococcus tauri] (GB:CAL52917.1); similar to Os01g0763100 [Oryza sativa (japonica cultivar-group)] (GB:NP_001044332.1); contains InterPro domain Rhomboid-like protein; (In…	-0.821606	0.565812	7.30869	158.538	-6.54126	9.0736e-05	0.00126201
250823_at	5923	AT5G05180	similar to unknown protein [Arabidopsis thaliana] (TAIR:AT3G10880.1); similar to Os05g0168800 [Oryza sativa (japonica cultivar-group)] (GB:NP_001054757.1); similar to Os01g0168100 [Oryza sativa (japonica cultivar-group)] (GB:NP_001042126.1); similar to tRNA-binding arm [Medicago truncatula] (GB:ABE94140.1)	-0.823059	0.565242	6.87072	117.029	-6.73529	7.2174e-05	0.00106214
248593_at	3693	AT5G49180	pectinesterase family protein	-0.825103	0.564442	7.11015	138.156	-7.12229	4.63377e-05	0.000764253
261825_at	16925	AT1G11545	xyloglucan:xyloglucosyl transferase, putative / xyloglucan endotransglycosylase, putative / endo-xyloglucan transferase, putative	-0.825552	0.564266	7.67296	204.075	-8.65649	9.36789e-06	0.000230062
252248_at	7348	AT3G49750	leucine-rich repeat family protein	-0.828261	0.563208	6.87835	117.649	-13.3112	2.25091e-07	1.5452e-05
256128_at	11228	AT1G18140	LAC1 (Laccase 1); copper ion binding / oxidoreductase	-0.828555	0.563093	5.65839	50.5062	-7.65383	2.59155e-05	0.000494427
265083_at	20183	AT1G03820	similar to unknown protein [Arabidopsis thaliana] (TAIR:AT2G33850.1); similar to arabinogalactan-protein; AGP [Pyrus communis] (GB:AAB35283.1)	-0.831808	0.561825	7.89334	237.756	-7.69174	2.48922e-05	0.000479148
254809_at	9909	AT4G12410	auxin-responsive family protein	-0.833291	0.561247	7.70178	208.194	-3.1475	0.0112979	0.0496923
251394_at	6494	AT3G60900	FLA10 (fasciclin-like arabinogalactan-protein 10)	-0.835841	0.560256	7.47126	177.449	-9.20693	5.57259e-06	0.0001609
262765_at	17865	AT1G13150	CYP86C4 (cytochrome P450, family 86, subfamily C, polypeptide 4); oxygen binding	-0.836321	0.56007	8.39085	335.657	-6.32337	0.000117981	0.00155288
248623_at	3723	AT5G49170	similar to unknown protein [Arabidopsis thaliana] (TAIR:AT3G06840.1)	-0.837237	0.559715	6.74965	107.608	-6.89678	5.98615e-05	0.000927262
261923_at	17023	AT1G22380	transcription factor/ transferase, transferring glycosyl groups	-0.839	0.559031	7.58538	192.055	-7.24903	4.02287e-05	0.000688174
260233_at	15333	AT1G74550	CYP98A9 (cytochrome P450, family 98, subfamily A, polypeptide 9); oxygen binding	-0.839094	0.558995	8.80519	447.329	-10.5205	1.77717e-06	7.1118e-05
249150_at	4250	AT5G43340	PHT6 (phosphate transporter 6); carbohydrate transporter/ phosphate transporter/ sugar porter	-0.839217	0.558947	7.67487	204.346	-9.19721	5.62268e-06	0.000161528
254158_at	9258	AT4G24380	hydrolase, acting on ester bonds	-0.840487	0.558455	9.60245	777.363	-6.10617	0.000154205	0.00192208
255595_at	10695	AT4G01700	chitinase, putative	-0.841015	0.558251	6.97077	125.433	-10.1137	2.49799e-06	9.04431e-05
255878_at	10978	AT2G40620	bZIP18; transcription factor family protein	-0.844456	0.556921	7.35906	164.171	-8.47259	1.12095e-05	0.000260906
247541_at	2641	AT5G61660	glycine-rich protein	-0.845371	0.556568	8.2676	308.174	-10.9688	1.2371e-06	5.41959e-05
257633_at	12733	AT3G26125	CYP86C2 (cytochrome P450, family 86, subfamily C, polypeptide 2); oxygen binding	-0.845376	0.556566	9.86415	931.977	-10.5232	1.77321e-06	7.10844e-05
262764_at	17864	AT1G13140	CYP86C3 (cytochrome P450, family 86, subfamily C, polypeptide 3); oxygen binding	-0.845415	0.556551	9.58288	766.892	-6.6868	7.63894e-05	0.00110631
264187_at	19287	AT1G54860	similar to unknown protein [Arabidopsis thaliana] (TAIR:AT5G19250.1); similar to conserved hypothetical protein [Medicago truncatula] (GB:ABD32399.1)	-0.846618	0.556087	8.57199	380.563	-6.93535	5.72722e-05	0.000896008
260097_at	15197	AT1G73220	sugar transporter family protein	-0.847358	0.555802	8.34254	324.604	-7.9677	1.86481e-05	0.000382864
245422_at	522	AT4G17470	palmitoyl protein thioesterase family protein	-0.847904	0.555591	5.60538	48.684	-12.6585	3.51603e-07	2.13868e-05
249850_at	4950	AT5G23240;AT5G23235	[AT5G23240, DNAJ heat shock N-terminal domain-containing protein]	-0.850455	0.55461	8.57696	381.876	-10.0649	2.60407e-06	9.32479e-05
259615_at	14715	AT1G47980	similar to unknown protein [Arabidopsis thaliana] (TAIR:AT3G62730.1); similar to H0502B11.4 [Oryza sativa (indica cultivar-group)] (GB:CAH66524.1); contains domain DHS-like NAD/FAD-binding domain (SSF52467)	-0.852724	0.553738	10.9793	2018.83	-5.06649	0.000606723	0.00531954
267425_at	22525	AT2G34810	FAD-binding domain-containing protein	-0.854058	0.553226	9.99619	1021.3	-12.3004	4.53091e-07	2.56452e-05
256398_at	11498	AT3G06100	NIP7;1/NLM6/NLM8 (NOD26-like intrinsic protein 7;1); water channel	-0.855632	0.552623	8.26335	307.268	-7.44947	3.22859e-05	0.000584941
254349_at	9449	AT4G22250	zinc finger (C3HC4-type RING finger) family protein	-0.858221	0.551633	6.7685	109.024	-9.82182	3.2121e-06	0.000108224
248353_at	3453	AT5G52320	CYP96A4 (cytochrome P450, family 96, subfamily A, polypeptide 4); oxygen binding	-0.858465	0.551539	7.28572	156.034	-9.78566	3.31518e-06	0.000110716
249046_at	4146	AT5G44400	FAD-binding domain-containing protein	-0.863211	0.549728	10.1739	1155.14	-5.84139	0.00021552	0.00245432
259403_at	14503	AT1G17745	PGDH (3-PHOSPHOGLYCERATE DEHYDROGENASE); phosphoglycerate dehydrogenase	-0.863918	0.549458	10.8012	1784.41	-11.2232	1.01296e-06	4.67797e-05
248878_at	3978	AT5G46160	ribosomal protein L14 family protein / huellenlos paralog (HLP)	-0.864788	0.549127	8.99185	509.117	-13.0322	2.71694e-07	1.75562e-05
253697_at	8797	AT4G29700	type I phosphodiesterase/nucleotide pyrophosphatase family protein	-0.86876	0.547617	8.11744	277.711	-8.12953	1.57988e-05	0.000338376
266201_at	21301	AT2G39060	nodulin MtN3 family protein	-0.869545	0.547319	5.15753	35.6921	-3.90138	0.00338023	0.0197396
250294_at	5394	AT5G13380	auxin-responsive GH3 family protein	-0.872293	0.546278	8.79126	443.029	-7.00488	5.29075e-05	0.000845704
252374_at	7474	AT3G48100	ARR5 (ARABIDOPSIS RESPONSE REGULATOR 5); transcription regulator/ two-component response regulator	-0.873318	0.54589	5.49832	45.2023	-9.3229	5.01112e-06	0.000150202
251944_at	7044	AT3G53510	ABC transporter family protein	-0.873861	0.545684	5.93169	61.0405	-4.48319	0.00139933	0.0100532
245465_at	565	AT4G16590	ATCSLA01 (Cellulose synthase-like A1); glucosyltransferase/ transferase, transferring glycosyl groups	-0.874225	0.545547	9.6658	812.264	-7.47381	3.14444e-05	0.000571967
260955_at	16055	AT1G06000	UDP-glucoronosyl/UDP-glucosyl transferase family protein	-0.874724	0.545358	9.63225	793.588	-10.3662	2.01944e-06	7.77997e-05
259398_at	14498	AT1G17700	prenylated rab acceptor (PRA1) family protein	-0.877386	0.544353	6.04705	66.1217	-7.09676	4.76866e-05	0.000776482
248527_at	3627	AT5G50740	metal ion binding	-0.878905	0.54378	6.40168	84.5471	-13.062	2.66245e-07	1.73022e-05
250471_at	5571	AT5G10170	inositol-3-phosphate synthase, putative / myo-inositol-1-phosphate synthase, putative / MI-1-P synthase, putative	-0.878935	0.543769	6.83787	114.394	-8.81974	8.00856e-06	0.000205947
246601_at	1701	AT1G31710	copper amine oxidase, putative	-0.880701	0.543103	6.99448	127.511	-7.31447	3.74228e-05	0.000650621
247074_at	2174	AT5G66590	allergen V5/Tpx-1-related family protein	-0.884822	0.541554	9.12332	557.689	-10.382	1.99297e-06	7.70503e-05
249817_at	4917	AT5G23820	MD-2-related lipid recognition domain-containing protein / ML domain-containing protein	-0.885376	0.541346	7.91474	241.309	-10.7313	1.49644e-06	6.3094e-05
264827_at	19927	AT1G03390	transferase family protein	-0.887372	0.540598	5.57335	47.6152	-9.2467	5.37262e-06	0.000157207
251617_at	6717	AT3G58000	VQ motif-containing protein	-0.888208	0.540285	6.97948	126.192	-8.8416	7.84362e-06	0.000203557
257858_at	12958	AT3G12920	protein binding / zinc ion binding	-0.890313	0.539497	9.52292	735.673	-12.255	4.68109e-07	2.61139e-05
251575_at	6675	AT3G58120	bZIP61; transcription factor family protein	-0.892723	0.538597	7.62421	197.295	-8.49962	1.09155e-05	0.000256683
254111_at	9211	AT4G24890	ATPAP24/PAP24 (purple acid phosphatase 24); acid phosphatase/ protein serine/threonine phosphatase	-0.892878	0.538539	6.08699	67.9775	-8.03316	1.7433e-05	0.000364478
264175_at	19275	AT1G02050	chalcone and stilbene synthase family protein	-0.893748	0.538214	9.81888	903.189	-6.64319	8.04109e-05	0.0011514
247760_at	2860	AT5G59130	subtilase family protein	-0.895868	0.537424	6.11449	69.2859	-8.65529	9.37876e-06	0.000230062
248793_at	3893	AT5G47240	ATNUDT8 (Arabidopsis thaliana Nudix hydrolase homolog 8); hydrolase	-0.901157	0.535457	8.00533	256.947	-9.74767	3.42742e-06	0.00011265
256307_at	11407	AT1G30350	pectate lyase family protein	-0.902344	0.535017	8.23764	301.84	-6.70544	7.47382e-05	0.00109141
267560_at	22660	AT2G45580	CYP76C3 (cytochrome P450, family 76, subfamily C, polypeptide 3); oxygen binding	-0.902402	0.534995	6.22303	74.6998	-4.55467	0.00125979	0.00925626
252786_at	7886	AT3G42670	CHR38 (chromatin remodeling 38); ATP binding / DNA binding / helicase	-0.902726	0.534875	6.38537	83.5965	-7.82654	2.15962e-05	0.000426871
255773_at	10873	AT1G18590	SOT17; sulfotransferase family protein	-0.904903	0.534069	6.86953	116.932	-10.0479	2.64215e-06	9.43152e-05
262585_at	17685	AT1G15460	anion exchange family protein	-0.907222	0.533211	8.1348	281.074	-10.3241	2.09171e-06	7.96525e-05
266419_at	21519	AT2G38760	ANNAT3 (ANNEXIN 3, ANNEXIN ARABIDOPSIS 3); calcium ion binding / calcium-dependent phospholipid binding	-0.907816	0.532992	6.89899	119.345	-8.79945	8.16509e-06	0.000208796
248681_at	3781	AT5G48900	pectate lyase family protein	-0.908376	0.532784	9.54757	748.35	-10.3643	2.02259e-06	7.77997e-05
255876_at	10976	AT2G40480	similar to unknown protein [Arabidopsis thaliana] (TAIR:AT3G56270.1); similar to putative myosin heavy chain [Dendrobium grex Madame Thong-In] (GB:AAD20814.1); similar to Os07g0677900 [Oryza sativa (japonica cultivar-group)] (GB:NP_001060633.1); similar to Os03g0339700 [Oryza sativa (japonica cultivar-group)] (GB:NP_001050061.1); contains InterPro domain Protein of unknown function DUF827, plant;…	-0.911137	0.531766	7.30888	158.56	-11.2694	9.77247e-07	4.56783e-05
256062_at	11162	AT1G07090	similar to unknown protein [Arabidopsis thaliana] (TAIR:AT5G58500.1); similar to hypothetical protein [Oryza sativa (japonica cultivar-group)] (GB:BAB68109.1); contains InterPro domain Protein of unknown function DUF640; (InterPro:IPR006936)	-0.915661	0.530101	7.20726	147.775	-7.42649	3.31031e-05	0.000596431
253195_at	8295	AT4G35420	dihydroflavonol 4-reductase family / dihydrokaempferol 4-reductase family	-0.917721	0.529345	10.2706	1235.24	-4.77898	0.000910351	0.00726171
245089_at	189	AT2G45290	transketolase, putative	-0.919044	0.528859	7.26774	154.102	-7.2443	4.04399e-05	0.000690445
249920_at	5020	AT5G19260	similar to unknown protein [Arabidopsis thaliana] (TAIR:AT3G06020.1); similar to hypothetical protein 12 [Plantago major] (GB:CAJ34820.1)	-0.91944	0.528714	6.75832	108.257	-6.41443	0.000105643	0.00142166
246963_at	2063	AT5G24820	aspartyl protease family protein	-0.921027	0.528133	5.81814	56.42	-14.0746	1.36924e-07	1.10362e-05
260547_at	15647	AT2G43550	trypsin inhibitor, putative	-0.921604	0.527922	12.1802	4640.79	-15.6134	5.39846e-08	5.83596e-06
267440_at	22540	AT2G19070	transferase family protein	-0.924492	0.526866	9.88158	943.305	-8.40041	1.20376e-05	0.000275128
253721_at	8821	AT4G29250	transferase family protein	-0.926026	0.526306	7.3743	165.915	-7.13307	4.57807e-05	0.000758357
258552_at	13652	AT3G07010	pectate lyase family protein	-0.927443	0.525789	9.07058	537.671	-8.88918	7.49725e-06	0.000197931
253087_at	8187	AT4G36350	ATPAP25/PAP25 (purple acid phosphatase 25); acid phosphatase/ protein serine/threonine phosphatase	-0.928367	0.525453	8.24197	302.748	-4.64723	0.00110077	0.00833898
254685_at	9785	AT4G13790	auxin-responsive protein, putative	-0.92913	0.525175	7.60135	194.194	-4.80168	0.00088127	0.00708058
257267_at	12367	AT3G15030	TCP4 (TCP family transcription factor 4, maternal effect embryo arrest 35); transcription factor	-0.930275	0.524758	8.31503	318.473	-12.7986	3.18967e-07	1.96639e-05
259426_at	14526	AT1G01470	LEA14 (LATE EMBRYOGENESIS ABUNDANT 14)	-0.937361	0.522187	8.43652	346.454	-13.9784	1.45573e-07	1.13562e-05
248716_at	3816	AT5G48210	similar to unknown protein [Arabidopsis thaliana] (TAIR:AT3G42565.1)	-0.938643	0.521724	10.393	1344.67	-14.1534	1.30256e-07	1.06876e-05
248752_at	3852	AT5G47600	heat shock protein-related	-0.941683	0.520625	9.56265	756.216	-6.74633	7.12497e-05	0.00105396
252916_at	8016	AT4G38950	kinesin motor family protein	-0.957685	0.514883	7.3926	168.033	-11.9477	5.85463e-07	3.04895e-05
251598_at	6698	AT3G57600	DREB2F; AP2 domain-containing transcription factor, putative	-0.959567	0.514211	7.37559	166.064	-16.0763	4.14862e-08	4.95445e-06
263153_s_at	18253	AT1G54000;AT1G54010	[AT1G54000, myrosinase-associated protein, putative];[AT1G54010, myrosinase-associated protein, putative]	-0.959674	0.514173	7.79772	222.51	-14.1184	1.33174e-07	1.08489e-05
260773_at	15873	AT1G78440	ATGA2OX1 (GIBBERELLIN 2-OXIDASE 1); gibberellin 2-beta-dioxygenase	-0.96447	0.512467	5.61307	48.9443	-7.50439	3.04207e-05	0.00056095
264091_at	19191	AT1G79110	protein binding / zinc ion binding	-0.966303	0.511816	8.0558	266.096	-12.9391	2.89542e-07	1.83048e-05
250982_at	6082	AT5G03150	JKD (JACKDAW); zinc finger (C2H2 type) family protein	-0.966934	0.511592	5.9134	60.2712	-6.9525	5.61606e-05	0.000879823
249732_at	4832	AT5G24420	glucosamine/galactosamine-6-phosphate isomerase-related	-0.969607	0.510645	11.8436	3675.08	-12.6008	3.66112e-07	2.21513e-05
255645_at	10745	AT4G00880	auxin-responsive family protein	-0.972695	0.509553	6.94993	123.634	-7.85264	2.10148e-05	0.000417913
253240_at	8340	AT4G34510	KCS2 (3-ketoacyl-CoA synthase 2); acyltransferase	-0.975207	0.508667	7.0908	136.315	-4.67684	0.00105455	0.0080746
252200_at	7300	AT3G50280	transferase family protein	-0.977689	0.507793	7.80668	223.895	-12.0598	5.39276e-07	2.90853e-05
259719_at	14819	AT1G61070	LCR66/PDF2.4 (Low-molecular-weight cysteine-rich 66)	-0.979929	0.507005	6.58112	95.7448	-9.94166	2.89479e-06	0.00010075
259574_at	14674	AT1G35310	Bet v I allergen family protein	-0.980062	0.506958	9.55644	752.966	-4.17928	0.00220516	0.0143468
245538_at	638	AT4G15200	formin homology 2 domain-containing protein / FH2 domain-containing protein	-0.980219	0.506903	5.58081	47.8621	-8.55113	1.03784e-05	0.000247363
263599_at	18699	AT2G01830	WOL (CYTOKININ RESPONSE 1)	-0.982199	0.506207	7.22236	149.33	-9.6393	3.77117e-06	0.000121327
248889_at	3989	AT5G46230	similar to unknown protein [Arabidopsis thaliana] (TAIR:AT1G09310.1); similar to hypothetical protein [Oryza sativa (japonica cultivar-group)] (GB:BAC10818.1); similar to Os07g0119800 [Oryza sativa (japonica cultivar-group)] (GB:NP_001058773.1); similar to Os01g0210600 [Oryza sativa (japonica cultivar-group)] (GB:NP_001042369.1); contains InterPro domain Protein of unknown function DUF538; (Inter…	-0.987274	0.50443	6.52507	92.096	-8.25355	1.39375e-05	0.000307285
263133_at	18233	AT1G78450	SOUL heme-binding family protein	-0.987368	0.504397	5.88429	59.0675	-14.0021	1.4339e-07	1.12783e-05
260385_at	15485	AT1G74090	SOT18; sulfotransferase family protein	-0.992511	0.502602	9.78094	879.746	-10.4007	1.96233e-06	7.62533e-05
256099_at	11199	AT1G13710	CYP78A5 (cytochrome P450, family 78, subfamily A, polypeptide 5); oxygen binding	-0.994227	0.502005	8.59606	386.966	-11.803	6.51637e-07	3.2812e-05
263909_at	19009	AT2G36490	ROS1 (repressor of silencing1)	-0.996015	0.501383	8.10448	275.228	-14.1725	1.28702e-07	1.06124e-05
248368_at	3468	AT5G51950	glucose-methanol-choline (GMC) oxidoreductase family protein	-0.996621	0.501172	8.0853	271.593	-7.60306	2.73586e-05	0.000515743
255822_at	10922	AT2G40610	ATEXPA8 (ARABIDOPSIS THALIANA EXPANSIN A8)	-0.998864	0.500394	9.67524	817.596	-9.67631	3.64972e-06	0.000118421
259282_at	14382	AT3G11430	ATGPAT5/GPAT5 (GLYCEROL-3-PHOSPHATE ACYLTRANSFERASE 5); 1-acylglycerol-3-phosphate O-acyltransferase/ acyltransferase/ organic anion transporter	-1.00037	0.499871	7.13463	140.52	-4.29875	0.00184128	0.0124259
250576_at	5676	AT5G08250	cytochrome P450 family protein	-1.00135	0.499534	5.48745	44.8628	-9.89563	3.0124e-06	0.000103328
252063_at	7163	AT3G51590	LTP12 (LIPID TRANSFER PROTEIN 12); lipid binding	-1.00164	0.499431	12.2077	4730.41	-12.5404	3.82012e-07	2.29307e-05
251339_at	6439	AT3G60780	similar to unknown protein [Arabidopsis thaliana] (TAIR:AT2G45360.1); similar to Os02g0455400 [Oryza sativa (japonica cultivar-group)] (GB:NP_001046773.1); similar to unknown protein [Oryza sativa (japonica cultivar-group)] (GB:BAD19988.1); contains InterPro domain Protein of unknown function DUF1442; (InterPro:IPR009902)	-1.00203	0.499297	5.8517	57.7482	-6.93073	5.75763e-05	0.0008983
260038_at	15138	AT1G68875	unknown protein	-1.00963	0.496673	11.8606	3718.79	-8.60624	9.83579e-06	0.000238675
257021_at	12121	AT3G19710	BCAT4 (BRANCHED-CHAIN AMINOTRANSFERASE4); catalytic/ methionine-oxo-acid transaminase	-1.01376	0.495254	8.09338	273.117	-5.22974	0.000484438	0.00448641
256481_at	11581	AT1G33430	galactosyltransferase family protein	-1.01651	0.49431	10.7402	1710.48	-11.2028	1.02919e-06	4.72351e-05
260745_at	15845	AT1G78370	ATGSTU20 (Arabidopsis thaliana Glutathione S-transferase (class tau) 20); glutathione transferase	-1.02056	0.492925	11.8959	3810.86	-10.1284	2.46683e-06	8.97423e-05
254226_at	9326	AT4G23690	disease resistance-responsive family protein / dirigent family protein	-1.02099	0.492777	9.1527	569.165	-10.1242	2.47569e-06	8.98919e-05
250091_at	5191	AT5G17340	similar to unknown protein [Arabidopsis thaliana] (TAIR:AT3G03272.1); similar to M3.4 protein [Brassica napus] (GB:AAD24197.1)	-1.02615	0.491019	9.1799	579.995	-5.02089	0.000646543	0.00561601
248526_at	3626	AT5G50740	metal ion binding	-1.03006	0.489689	8.9391	490.837	-13.9752	1.45874e-07	1.13562e-05
250669_at	5769	AT5G06870	PGIP2 (POLYGALACTURONASE INHIBITING PROTEIN 2); protein binding	-1.03333	0.488582	10.0003	1024.25	-13.663	1.7845e-07	1.31078e-05
261033_at	16133	AT1G17380	similar to unknown protein [Arabidopsis thaliana] (TAIR:AT1G72450.1); similar to PnFL-2 [Ipomoea nil] (GB:AAG49896.1); similar to Os07g0615200 [Oryza sativa (japonica cultivar-group)] (GB:NP_001060268.1); similar to Os03g0402800 [Oryza sativa (japonica cultivar-group)] (GB:NP_001050322.1); contains InterPro domain ZIM; (InterPro:IPR010399)	-1.03564	0.487799	8.28042	310.925	-14.6527	9.55049e-08	8.81346e-06
259635_at	14735	AT1G56360	ATPAP6/PAP6 (purple acid phosphatase 6); acid phosphatase/ protein serine/threonine phosphatase	-1.03893	0.486688	8.10934	276.155	-4.86456	0.00080578	0.00659485
263063_s_at	18163	AT2G18150;AT2G18140	[AT2G18150, peroxidase, putative];[AT2G18140, peroxidase, putative]	-1.04112	0.485949	6.12874	69.9737	-8.55618	1.03274e-05	0.000246669
265261_at	20361	AT2G42990	GDSL-motif lipase/hydrolase family protein	-1.04381	0.485045	10.1863	1165.12	-8.17243	1.51259e-05	0.000329849
252612_at	7712	AT3G45160	unknown protein	-1.04826	0.48355	5.54788	46.782	-6.84814	6.33103e-05	0.000964425
264527_at	19627	AT1G30760	FAD-binding domain-containing protein	-1.05092	0.482659	5.34629	40.6812	-11.4081	8.78167e-07	4.24385e-05
259609_at	14709	AT1G52410	TSA1 (TSK-ASSOCIATING PROTEIN 1); calcium ion binding / protein binding	-1.05142	0.482494	10.3123	1271.49	-12.1858	4.92076e-07	2.71774e-05
256781_at	11881	AT3G13650	disease resistance response	-1.05256	0.48211	8.02975	261.334	-12.3274	4.44425e-07	2.53433e-05
263431_at	18531	AT2G22170	lipid-associated family protein	-1.05361	0.48176	9.51658	732.447	-13.6552	1.79359e-07	1.31127e-05
256060_at	11160	AT1G07050	FITNESS; CCT domain protein	-1.06499	0.477975	5.95551	62.0564	-16.1651	3.94754e-08	4.8665e-06
259744_at	14844	AT1G71160	beta-ketoacyl-CoA synthase family protein	-1.07454	0.474824	8.11675	277.577	-6.91017	5.89487e-05	0.00091533
256662_at	11762	AT3G11980	MS2 (MALE STERILITY 2)	-1.0749	0.474704	9.38112	666.807	-5.41375	0.000377597	0.0037173
262949_at	18049	AT1G75790	SKS18 (SKU5 Similar 18); copper ion binding / pectinesterase	-1.07658	0.47415	8.04356	263.847	-8.87958	7.56578e-06	0.000198401
259987_at	15087	AT1G75030	ATLP-3 (Arabidopsis thaumatin-like protein 3)	-1.07787	0.473727	10.1775	1158.05	-4.78605	0.00090119	0.00721015
259680_at	14780	AT1G77690	amino acid permease, putative	-1.08005	0.473012	7.92026	242.235	-12.3496	4.37406e-07	2.50684e-05
257191_at	12291	AT3G13175	similar to unknown protein [Arabidopsis thaliana] (TAIR:AT4G16400.1)	-1.08154	0.472523	8.54074	372.407	-12.0724	5.34321e-07	2.90187e-05
246569_at	1669	AT5G14980	esterase/lipase/thioesterase family protein	-1.08671	0.470835	6.64938	100.384	-8.63776	9.53933e-06	0.000233218
262819_at	17919	AT1G11600	CYP77B1 (cytochrome P450, family 77, subfamily B, polypeptide 1); oxygen binding	-1.08692	0.470765	8.62615	395.12	-10.3461	2.05358e-06	7.85944e-05
250561_at	5661	AT5G08030	glycerophosphoryl diester phosphodiesterase family protein	-1.09127	0.469349	7.21682	148.758	-6.21716	0.000134384	0.00172208
246002_at	1102	AT5G20740	invertase/pectin methylesterase inhibitor family protein	-1.09152	0.469268	11.1577	2284.61	-12.2605	4.66272e-07	2.61139e-05
261226_at	16326	AT1G20190	ATEXPA11 (ARABIDOPSIS THALIANA EXPANSIN A11)	-1.09396	0.468475	7.35476	163.683	-7.12338	4.62808e-05	0.000764253
261913_at	17013	AT1G65860	FMO-GSOX1; flavin-containing monooxygenase family protein / FMO family protein	-1.09851	0.466998	6.27835	77.6197	-9.15388	5.8521e-06	0.000166235
247639_s_at	2739	AT5G60500;AT5G60510	[AT5G60500, undecaprenyl pyrophosphate synthetase family protein / UPP synthetase family protein];[AT5G60510, undecaprenyl pyrophosphate synthetase family protein / UPP synthetase family protein]	-1.09978	0.466588	8.18813	291.657	-14.287	1.19766e-07	1.01183e-05
260788_at	15888	AT1G06260	cysteine proteinase, putative	-1.1066	0.464389	10.6777	1637.97	-11.011	1.19641e-06	5.31971e-05
253772_at	8872	AT4G28395	ATA7 (Arabidopsis thaliana anther 7)	-1.10681	0.46432	10.7458	1717.13	-16.3559	3.55069e-08	4.49949e-06
264923_s_at	20023	AT1G65970;AT1G60740	[AT1G65970, TPX2 (THIOREDOXIN-DEPENDENT PEROXIDASE 2); antioxidant];[AT1G60740, peroxiredoxin type 2, putative]	-1.11219	0.462592	8.44167	347.694	-4.96902	0.000695263	0.00592858
266708_at	21808	AT2G03200	aspartyl protease family protein	-1.11246	0.462506	8.26318	307.232	-7.3135	3.74628e-05	0.000650819
246416_at	1516	AT5G16920	similar to unknown protein [Arabidopsis thaliana] (TAIR:AT5G26730.1); similar to Os12g0233900 [Oryza sativa (japonica cultivar-group)] (GB:NP_001066453.1); contains InterPro domain Beta-Ig-H3/fasciclin; (InterPro:IPR000782)	-1.11384	0.462062	9.76848	872.176	-8.50495	1.08585e-05	0.000256093
252035_at	7135	AT3G52160	beta-ketoacyl-CoA synthase family protein	-1.11637	0.461253	9.17836	579.378	-10.673	1.56889e-06	6.51845e-05
261826_at	16926	AT1G11580	pectin methylesterase, putative	-1.12086	0.459821	8.00372	256.662	-17.4368	1.98999e-08	3.1522e-06
255956_at	11056	AT1G22015	DD46; transferase, transferring hexosyl groups	-1.12212	0.459419	7.77067	218.375	-11.8701	6.19975e-07	3.17789e-05
267595_at	22695	AT2G32990	glycosyl hydrolase family 9 protein	-1.12281	0.4592	6.26055	76.668	-12.0023	5.62436e-07	2.99048e-05
254915_s_at	10015	AT4G11320;AT4G11310	[AT4G11320, cysteine proteinase, putative];[AT4G11310, RD21 (RESPONSIVE TO DEHYDRATION 21); cysteine-type peptidase]	-1.13003	0.456906	9.41088	680.702	-14.4162	1.10495e-07	9.65668e-06
260007_at	15107	AT1G67870	glycine-rich protein	-1.13139	0.456477	9.07688	540.022	-10.5313	1.76143e-06	7.07364e-05
245488_at	588	AT4G16270	peroxidase 40 (PER40) (P40)	-1.13277	0.45604	8.62033	393.529	-7.4806	3.12138e-05	0.00056959
265127_at	20227	AT1G55560	SKS14 (SKU5 Similar 14); copper ion binding / oxidoreductase	-1.13713	0.454664	6.77091	109.206	-8.94924	7.08375e-06	0.000191219
257220_at	12320	AT3G27810	MYB21 (MYB DOMAIN PROTEIN 21); DNA binding / transcription factor	-1.1451	0.452157	9.35688	655.695	-6.72642	7.29258e-05	0.0010718
254090_at	9190	AT4G25010	nodulin MtN3 family protein	-1.15356	0.449514	7.53433	185.378	-7.2366	4.0787e-05	0.000694811
259975_at	15075	AT1G76470	cinnamoyl-CoA reductase	-1.16456	0.446101	8.43757	346.707	-7.66813	2.55242e-05	0.000489249
248761_at	3861	AT5G47635	similar to unknown protein [Arabidopsis thaliana] (TAIR:AT2G40113.1); similar to hypothetical protein 31.t00008 [Brassica oleracea] (GB:ABD65108.1)	-1.16519	0.445906	7.13509	140.564	-10.5077	1.79607e-06	7.14979e-05
260228_at	15328	AT1G74540	CYP98A8 (cytochrome P450, family 98, subfamily A, polypeptide 8); oxygen binding	-1.16869	0.444826	9.32718	642.336	-13.0993	2.59579e-07	1.71127e-05
253879_s_at	8979	AT4G27560;AT4G27570	[AT4G27560, glycosyltransferase family protein];[AT4G27570, glycosyltransferase family protein]	-1.17065	0.44422	9.77869	878.374	-16.5831	3.13461e-08	4.157e-06
261096_at	16196	AT1G62940	4-coumarate--CoA ligase family protein / 4-coumaroyl-CoA synthase family protein	-1.17299	0.443501	8.68429	411.369	-5.69134	0.000261634	0.0028405
259165_at	14265	AT3G01470	ATHB-1 (Homeobox-leucine zipper protein HAT5); transcription factor	-1.17974	0.441433	8.22295	298.783	-16.4618	3.34963e-08	4.36601e-06
260260_at	15360	AT1G68540	oxidoreductase family protein	-1.18514	0.439782	9.80986	897.556	-6.54179	9.06788e-05	0.00126201
257570_at	12670	AT3G13662	disease resistance-responsive protein-related / dirigent protein-related	-1.1883	0.438819	5.94523	61.616	-15.0086	7.70051e-08	7.60384e-06
246095_at	1195	AT5G19310	homeotic gene regulator, putative	-1.19133	0.437898	6.93361	122.243	-8.56925	1.01965e-05	0.000244052
246418_at	1518	AT5G16960	NADP-dependent oxidoreductase, putative	-1.19431	0.436996	10.2805	1243.73	-14.7174	9.18101e-08	8.65367e-06
266766_at	21866	AT2G46880	ATPAP14/PAP14; acid phosphatase/ protein serine/threonine phosphatase	-1.19469	0.43688	6.62443	98.6623	-8.29258	1.34025e-05	0.000300011
267129_at	22229	AT2G23380	CLF (CURLY LEAF); Polycomb group factor	-1.1967	0.436273	6.50328	90.7157	-11.2535	9.89386e-07	4.59631e-05
252780_at	7880	AT3G42960	ATA1 (ARABIDOPSIS TAPETUM 1); oxidoreductase	-1.20203	0.434664	9.37891	665.783	-9.04405	6.48098e-06	0.000180723
257671_at	12771	AT3G20450	similar to unknown protein [Arabidopsis thaliana] (TAIR:AT1G11905.1); similar to unknown protein [Oryza sativa (japonica cultivar-group)] (GB:BAD69146.1); similar to Os06g0367500 [Oryza sativa (japonica cultivar-group)] (GB:NP_001057612.1); similar to Os05g0272900 [Oryza sativa (japonica cultivar-group)] (GB:NP_001055067.1); contains domain BCR-ASSOCIATED PROTEIN, BAP (PTHR12701:SF1); contains do…	-1.2048	0.433829	8.84178	458.818	-17.233	2.2137e-08	3.37602e-06
254862_at	9962	AT4G12030	BAT5; bile acid:sodium symporter family protein	-1.20567	0.433568	7.20882	147.935	-12.1524	5.04123e-07	2.76448e-05
248863_at	3963	AT5G46750	AGD8 (ARF-GAP DOMAIN 8); DNA binding	-1.21104	0.431956	10.3775	1330.24	-17.3209	2.11405e-08	3.30284e-06
266395_at	21495	AT2G43100	IPMI LSU1; aconitase C-terminal domain-containing protein	-1.21585	0.43052	8.61255	391.414	-10.4491	1.88512e-06	7.41243e-05
254465_at	9565	AT4G20420	tapetum-specific protein-related	-1.25024	0.420379	9.78087	879.702	-5.42471	0.000372092	0.00367579
265263_at	20363	AT2G42940	AHL16; AT-Hook DNA-binding family protein	-1.26363	0.416495	7.75879	216.585	-9.88821	3.03184e-06	0.000103838
256297_at	11397	AT1G69500	oxygen binding	-1.27099	0.414374	8.98273	505.906	-5.52075	0.000327386	0.00336231
265121_at	20221	AT1G62560	FMO-GSOX3; flavin-containing monooxygenase family protein / FMO family protein	-1.2748	0.413282	6.73552	106.56	-11.308	9.48532e-07	4.49813e-05
248864_at	3964	AT5G46760	MYC3; basic helix-loop-helix (bHLH) family protein	-1.27682	0.412704	9.58124	766.022	-18.5992	1.10764e-08	2.17804e-06
254687_at	9787	AT4G13770	CYP83A1 (CYTOCHROME P450 83A1); oxygen binding	-1.27775	0.412439	10.5738	1524.19	-17.6044	1.82475e-08	2.91067e-06
249349_at	4449	AT5G40350	MYB24 (myb domain protein 24); DNA binding / transcription factor	-1.28169	0.411314	6.7219	105.558	-8.9466	7.10135e-06	0.000191262
261051_at	16151	AT1G01280	CYP703A2 (cytochrome P450, family 703, subfamily A, polypeptide 2); oxygen binding	-1.2881	0.40949	8.40944	340.012	-6.21652	0.000134491	0.00172248
252870_at	7970	AT4G39940	AKN2 (APS-KINASE 2); ATP binding / kinase/ transferase, transferring phosphorus-containing groups	-1.29088	0.408702	9.16307	573.271	-16.6439	3.03272e-08	4.11764e-06
248643_at	3743	AT5G49130	MATE efflux family protein	-1.30121	0.405785	7.47822	178.307	-12.4553	4.05689e-07	2.37685e-05
264906_at	20006	AT2G17270	mitochondrial substrate carrier family protein	-1.31179	0.402821	6.46673	88.4462	-15.0777	7.3893e-08	7.32826e-06
257183_at	12283	AT3G13220	ABC transporter family protein	-1.31645	0.401521	7.90648	239.932	-6.48613	9.69151e-05	0.0013293
252114_at	7214	AT3G51450	strictosidine synthase family protein	-1.32493	0.399169	7.90995	240.51	-13.4382	2.06854e-07	1.45543e-05
245622_at	722	AT4G14080	MEE48 (maternal effect embryo arrest 48); hydrolase, hydrolyzing O-glycosyl compounds	-1.33615	0.396076	10.3542	1308.95	-6.16897	0.000142628	0.00180441
249761_at	4861	AT5G23970	transferase family protein	-1.34452	0.393786	7.46717	176.946	-11.9339	5.91438e-07	3.06622e-05
248841_at	3941	AT5G46740	UBP21 (UBIQUITIN-SPECIFIC PROTEASE 21); ubiquitin-specific protease	-1.35308	0.391455	8.28646	312.228	-16.4789	3.31831e-08	4.35004e-06
254338_s_at	9438	AT4G22080;AT4G22090	[AT4G22080, pectate lyase family protein];[AT4G22090, pectate lyase family protein]	-1.36495	0.388247	7.10241	137.416	-5.21522	0.00049416	0.00455979
253627_at	8727	AT4G30650	hydrophobic protein, putative / low temperature and salt responsive protein, putative	-1.36672	0.387772	9.50071	724.435	-16.1651	3.94742e-08	4.8665e-06
253222_at	8322	AT4G34850	chalcone and stilbene synthase family protein	-1.36892	0.387181	9.6457	801.022	-7.11095	4.69316e-05	0.000767899
259753_at	14853	AT1G71050	heavy-metal-associated domain-containing protein / copper chaperone (CCH)-related	-1.3737	0.385901	7.84455	229.85	-14.2831	1.20057e-07	1.01183e-05
248350_at	3450	AT5G52160	protease inhibitor/seed storage/lipid transfer protein (LTP) family protein	-1.37453	0.385677	6.92	121.095	-6.85004	6.31713e-05	0.000963838
247758_at	2858	AT5G59120	subtilase family protein	-1.38324	0.383357	9.66602	812.383	-11.2996	9.54672e-07	4.5085e-05
259383_at	14483	AT3G16470	JR1 (Jacalin lectin family protein)	-1.39001	0.381561	12.039	4208.16	-18.2868	1.29203e-08	2.36228e-06
260621_at	15721	AT1G08065	carbonate dehydratase/ zinc ion binding	-1.39398	0.380514	8.28114	311.079	-6.58138	8.65093e-05	0.00121807
251524_at	6624	AT3G58990	IPMI SSU3; aconitase C-terminal domain-containing protein	-1.41508	0.37499	8.54282	372.945	-19.044	8.93321e-09	1.86481e-06
249540_at	4640	AT5G38120	4-coumarate--CoA ligase family protein / 4-coumaroyl-CoA synthase family protein	-1.41793	0.374249	8.1482	283.695	-8.02018	1.76668e-05	0.000368354
254234_at	9334	AT4G23680	major latex protein-related / MLP-related	-1.42055	0.373571	10.7336	1702.73	-22.9625	1.61587e-09	6.04229e-07
247462_at	2562	AT5G62080	protease inhibitor/seed storage/lipid transfer protein (LTP) family protein	-1.42612	0.372131	10.8907	1898.56	-10.5692	1.70756e-06	6.91819e-05
250619_at	5719	AT5G07230	protease inhibitor/seed storage/lipid transfer protein (LTP) family protein	-1.43317	0.370317	10.9117	1926.46	-9.36799	4.80987e-06	0.000145648
266326_at	21426	AT2G46650	B5 #1 (cytochrome b5 family protein #1); heme binding / transition metal ion binding	-1.44723	0.366726	9.12778	559.416	-20.8729	3.87021e-09	1.02651e-06
258851_at	13951	AT3G03190	ATGSTF11 (GLUTATHIONE S-TRANSFERASE F11); glutathione transferase	-1.46077	0.3633	7.27124	154.476	-10.3053	2.12479e-06	8.0229e-05
260001_at	15101	AT1G67990	caffeoyl-CoA 3-O-methyltransferase, putative	-1.46732	0.361655	11.3271	2569.2	-19.7215	6.4966e-09	1.48188e-06
247814_at	2914	AT5G58310	hydrolase, alpha/beta fold family protein	-1.47485	0.35977	8.09904	274.191	-11.1184	1.09942e-06	4.99559e-05
250633_at	5733	AT5G07460	PMSR2 (PEPTIDEMETHIONINE SULFOXIDE REDUCTASE 2); protein-methionine-S-oxide reductase	-1.50054	0.353422	7.85392	231.349	-9.99416	2.76679e-06	9.75433e-05
262115_at	17215	AT1G02813	similar to unknown protein [Arabidopsis thaliana] (TAIR:AT4G02360.1); similar to Os05g0362300 [Oryza sativa (japonica cultivar-group)] (GB:NP_001055314.1); similar to Protein of unknown function, DUF538 [Oryza sativa (japonica cultivar-group)] (GB:AAX95409.1); similar to Os05g0362500 [Oryza sativa (japonica cultivar-group)] (GB:NP_001055315.1); contains InterPro domain Protein of unknown function…	-1.50077	0.353364	9.7542	863.585	-12.8305	3.11996e-07	1.93914e-05
261264_at	16364	AT1G26710	similar to unknown protein [Arabidopsis thaliana] (TAIR:AT1G26720.1)	-1.52254	0.348074	7.47281	177.639	-20.0109	5.68821e-09	1.33761e-06
256509_at	11609	AT1G75300	isoflavone reductase, putative	-1.5383	0.34429	6.98262	126.467	-11.9526	5.8336e-07	3.04895e-05
264430_at	19530	AT1G61680	terpene synthase/cyclase family protein	-1.55371	0.340633	7.02732	130.447	-9.89612	3.01112e-06	0.000103328
259063_at	14163	AT3G07450	protease inhibitor/seed storage/lipid transfer protein (LTP) family protein	-1.57018	0.336765	9.55844	754.01	-10.0605	2.61375e-06	9.34476e-05
267317_at	22417	AT2G34700	pollen Ole e 1 allergen and extensin family protein	-1.61033	0.327523	7.35553	163.771	-17.6338	1.79734e-08	2.90354e-06
251595_at	6695	AT3G57620	glyoxal oxidase-related	-1.61515	0.326431	8.20627	295.347	-12.9271	2.91928e-07	1.8309e-05
266516_at	21616	AT2G47880	glutaredoxin family protein	-1.62623	0.323934	6.11077	69.1075	-10.4371	1.90391e-06	7.44908e-05
260022_at	15122	AT1G30020;AT1G30010	[AT1G30020, similar to unknown protein [Arabidopsis thaliana] (TAIR:AT5G46230.1); similar to hypothetical protein [Oryza sativa (japonica cultivar-group)] (GB:BAC10815.1); similar to Os01g0210600 [Oryza sativa (japonica cultivar-group)] (GB:NP_001042369.1); similar to hypothetical protein [Oryza sativa (japonica cultivar-group)] (GB:BAC15900.1); contains InterPro domain Protein of unknown functio…	-1.64283	0.320227	10.2135	1187.3	-21.0251	3.62164e-09	9.71879e-07
264052_at	19152	AT2G22330	CYP79B3 (cytochrome P450, family 79, subfamily B, polypeptide 3); oxygen binding	-1.65975	0.316494	6.82073	113.043	-13.4535	2.04776e-07	1.45543e-05
263495_at	18595	AT2G42530	cold-responsive protein / cold-regulated protein (cor15b)	-1.69455	0.308951	9.92493	972.077	-17.0007	2.50317e-08	3.6837e-06
252090_at	7190	AT3G52130	protease inhibitor/seed storage/lipid transfer protein (LTP) family protein	-1.70397	0.306941	9.70208	832.945	-8.60191	9.87729e-06	0.000239427
252102_at	7202	AT3G50970	LTI30/XERO2 (LOW TEMPERATURE-INDUCED 30)	-1.73092	0.301261	7.00729	128.649	-22.0887	2.30574e-09	7.30471e-07
245537_at	637	no_match	no_match	-1.78776	0.289621	5.70258	52.0771	-11.3807	8.9684e-07	4.30672e-05
257170_at	12270	AT3G23770	glycosyl hydrolase family 17 protein	-1.81457	0.284289	8.29182	313.391	-7.24863	4.02466e-05	0.000688174
253641_at	8741	AT4G29980	similar to unknown protein [Arabidopsis thaliana] (TAIR:AT1G30800.1); contains domain FAS1 domain (SSF82153)	-1.82402	0.282434	8.31945	319.45	-23.3201	1.40236e-09	5.49706e-07
259802_at	14902	AT1G72260	THI2.1 (THIONIN 2.1); toxin receptor binding	-1.8365	0.28	10.6105	1563.48	-8.89775	7.43666e-06	0.000197555
263497_at	18597	AT2G42540	COR15A (COLD-REGULATED 15A)	-1.85544	0.276348	9.98963	1016.66	-27.2166	3.38816e-10	2.00841e-07
265984_at	21084	AT2G24210	TPS10 (TERPENE SYNTHASE 10); myrcene/(E)-beta-ocimene synthase	-1.88524	0.270699	6.99137	127.237	-6.7717	6.91743e-05	0.00103196
259878_at	14978	AT1G76790	O-methyltransferase family 2 protein	-1.92779	0.262831	7.19181	146.201	-14.6209	9.73831e-08	8.81346e-06
248337_at	3437	AT5G52310	COR78 (COLD REGULATED 78)	-1.94033	0.260557	9.37205	662.625	-15.3235	6.38981e-08	6.50677e-06
264899_at	19999	AT1G23130	Bet v I allergen family protein	-1.94689	0.259374	8.66289	405.313	-14.6147	9.77556e-08	8.81346e-06
258897_at	13997	AT3G05730	Encodes a defensin-like (DEFL) family protein.	-2.05388	0.240836	6.08362	67.8191	-24.5005	8.91228e-10	3.76461e-07
266989_at	22089	AT2G39330	jacalin lectin family protein	-2.07427	0.237456	9.17621	578.516	-17.3855	2.04391e-08	3.21528e-06
260178_at	15278	AT1G70720	invertase/pectin methylesterase inhibitor family protein	-2.16743	0.222607	8.56901	379.776	-19.2813	7.98068e-09	1.69359e-06
254907_at	10007	AT4G11190	disease resistance-responsive family protein / dirigent family protein	-2.19245	0.218779	6.50387	90.7526	-16.7451	2.87092e-08	4.01752e-06
245275_at	375	AT4G15210	ATBETA-AMY (BETA-AMYLASE); beta-amylase	-2.65389	0.158891	8.8061	447.61	-15.3517	6.28508e-08	6.48482e-06
254452_at	9552	AT4G21100	DDB1B (DAMAGED DNA BINDING PROTEIN 1 B)	-3.67946	0.0780498	6.36248	82.2805	-37.79	1.63311e-11	2.52424e-08
